# Supplementary material for: Protonated Chiral 1,2-Diamine Organocatalysts for N-Selective Nitroso Aldol Reaction
Source: MDPI journal article supplement (doi:10.3390/catal12040435), 2022-04-13
Supplement: s1 [file s1]

# Protonated Chiral 1,2-Diamine Organocatalysts for *N*-Selective Nitroso-Aldol Reaction

*Jae Ho Shim,\* Ji Yeon Lee, Hyeon Soo Kim and Deok-Chan Ha*

*Department of Anatomy, Korea University College of Medicine, 46, Gaeunsa 2-gil, Seongbuk-gu, Seoul, 02842, Republic of Korea*

*E-mail: shimjh3000@korea.ac.kr*

*Department of Chemistry, Korea University, 145 Anam-ro Seongbuk-gu, Seoul 02841, Korea*

*E-mail: dechha@korea.ac.kr*

## Supporting Information

### Table of Contents

|                                                                                       |          |
|---------------------------------------------------------------------------------------|----------|
| Additional test results for optimization conditions.....                              | S-2      |
| Compound Characterization Data .....                                                  | S-3-6    |
| References .....                                                                      | S-7      |
| Copy of catalysts and products Data ( <sup>1</sup> H, <sup>13</sup> C NMR, MASS)..... | S-8-19   |
| Copy of support table data ( <sup>1</sup> H NMR, HPLC Chromatograms).....             | S-20-30  |
| Computational results of DFT Calculations for all calculated structures.....          | S-31-146 |

## Additional test results for optimization conditions

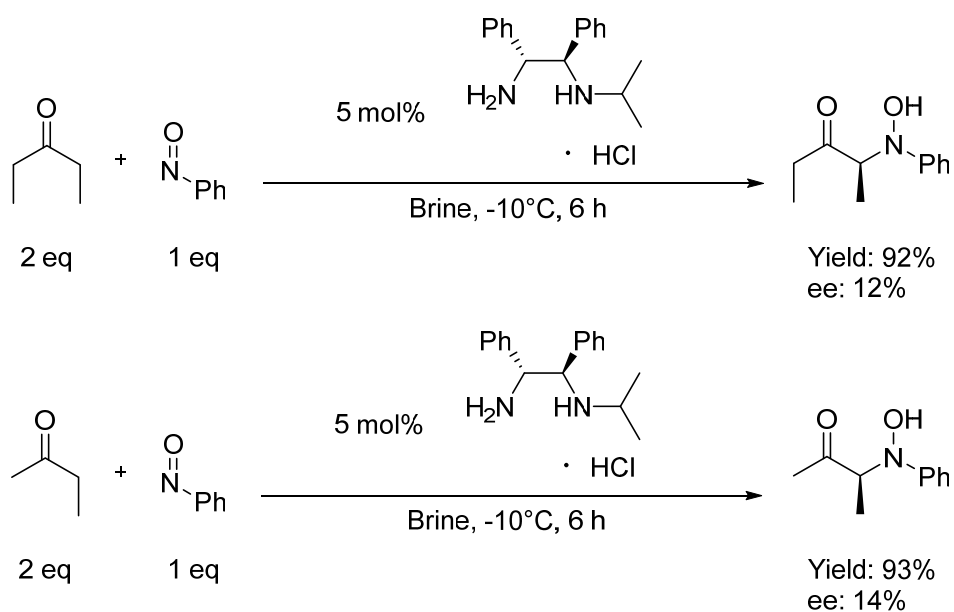

**Figure S1.** Results to changes in ketone types under optimized experimental conditions.

## Compound characterization data

### (1*R*,2*R*)-*N*-isopropyl-1,2-diphenyl ethylenediamine(1a)<sup>1</sup>

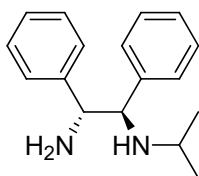

$[\alpha]_D^{25} +24.5^\circ$  ( $c = 5.1$ ,  $\text{CHCl}_3$ ), IR (KBr): 3378, 3023, 2958, 1609, 1454, 767, 718  $\text{cm}^{-1}$ ;  $^1\text{H}$  NMR (300 MHz,  $\text{CDCl}_3$ )  $\delta$  7.21 – 7.07 (m, 10H), 3.96 (d, 1H,  $J = 7.5$  Hz), 3.79 (d, 1H,  $J = 7.2$  Hz), 2.60 – 2.47 (m, 1H), 1.74 (s, 3H), 0.95 (d, 3H,  $J = 2.7$  Hz), 0.93 (d, 3H,  $J = 2.7$  Hz);  $^{13}\text{C}$  NMR (75 MHz,  $\text{CDCl}_3$ )  $\delta$  143.3, 141.9, 127.7 (2C), 127.7 (2C), 127.5 (2C), 126.9 (2C), 126.6, 126.5, 66.8, 61.8, 45.6, 24.3, 21.7, HRMS (FAB+) for  $\text{C}_{17}\text{H}_{23}\text{N}_2$   $[\text{M}+\text{H}]^+$ , Calcd: 255.1861, Found: 255.1863

### (1*R*,2*R*)-*N*-(3-pentyl)-1,2-diphenyl ethylenediamine(1b)<sup>1</sup>

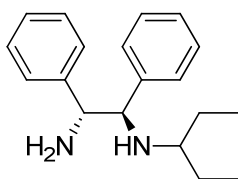

$[\alpha]_D^{25} +9.4$  ( $c = 6.3$ ,  $\text{CHCl}_3$ ), IR (KBr): 3374, 3031, 2953, 1605, 1458, 767, 702  $\text{cm}^{-1}$ ;  $^1\text{H}$  NMR (400 MHz,  $\text{CDCl}_3$ )  $\delta$  7.18 – 7.09 (m, 10H), 3.95 (d, 1H,  $J = 6.8$  Hz), 3.77 (d, 1H,  $J = 6.4$  Hz), 2.21 – 2.16 (m, 1H), 1.71 (s, 3H), 1.37 – 1.19 (m, 4H), 0.76 (t, 3H,  $J = 7.6$  Hz), 0.68 (t, 3H,  $J = 7.6$  Hz);  $^{13}\text{C}$  NMR (100 MHz,  $\text{CDCl}_3$ )  $\delta$  143.5, 142.1, 127.8 (2C), 127.7 (2C), 126.9 (2C), 126.6 (2C), 126.5 (2C), 66.6, 62.0, 56.1, 26.6, 24.1, 10.2, 8.2; HRMS (FAB+) for  $\text{C}_{19}\text{H}_{27}\text{N}_2$   $[\text{M}+\text{H}]^+$ , Calcd: 283.2174, Found: 283.2176

**(1*R*,2*R*)-*N*-(4-heptyl)-1,2-diphenyl ethylenediamine(1c)<sup>1</sup>**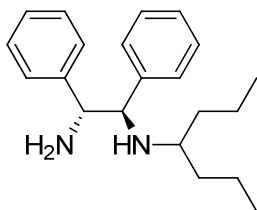

$[\alpha]_D^{25} +16.7$  ( $c = 17.3$ ,  $\text{CHCl}_3$ ), IR (KBr): 3382, 3023, 2953, 1597, 1450, 759, 710  $\text{cm}^{-1}$ ;  $^1\text{H}$  NMR (400 MHz,  $\text{CDCl}_3$ )  $\delta$  7.19 – 7.10 (m, 10H), 3.95 (d, 1H,  $J = 7.2$  Hz), 3.78 (d, 1H,  $J = 7.2$  Hz), 2.30 – 2.24 (m, 1H), 1.69 (s, 3H), 1.33 – 1.07 (m, 8H), 0.80 (t, 3H,  $J = 6.8$  Hz), 0.74 (t, 3H,  $J = 6.4$  Hz);  $^{13}\text{C}$  NMR (100 MHz,  $\text{CDCl}_3$ )  $\delta$  143.6, 142.3, 127.9 (2C), 127.8 (2C), 127.7 (2C), 126.9 (2C), 126.7, 126.6, 66.8, 62.0, 53.6, 37.2, 35.2, 18.9, 17.6, 14.4, 14.1; HRMS (FAB+) for  $\text{C}_{21}\text{H}_{31}\text{N}_2$   $[\text{M}+\text{H}]^+$ , Calcd: 311.2487, Found: 311.2480

**(1*R*,2*R*)-*N*-(5-nonyl)-1,2-diphenyl ethylenediamine(1d)<sup>1</sup>**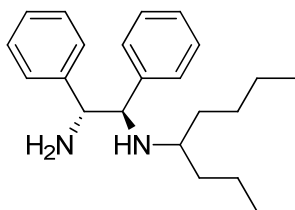

$[\alpha]_D^{25} -4.1$  ( $c = 8.5$ ,  $\text{CHCl}_3$ ), IR (KBr): 3370, 3031, 2925, 1601, 1458, 767, 702  $\text{cm}^{-1}$ ;  $^1\text{H}$  NMR (400 MHz,  $\text{CDCl}_3$ )  $\delta$  7.24 – 7.10 (m, 10H), 3.96 (d, 1H,  $J = 6.8$  Hz), 3.78 (d, 1H,  $J = 6.8$  Hz), 2.29 – 2.23 (m, 1H), 1.74 (s, 3H), 1.31 – 0.99 (m, 12H), 0.83 (t, 3H,  $J = 6.8$  Hz), 0.80 (t, 3H,  $J = 6.8$  Hz);  $^{13}\text{C}$  NMR (100 MHz,  $\text{CDCl}_3$ )  $\delta$  143.5, 142.2, /126.6, 126.6, 66.6, 61.9, 53.8, 34.4, 32.2, 27.9, 26.3, 23.0, 22.7, 14.0, 13.9; HRMS (FAB+) for  $\text{C}_{23}\text{H}_{35}\text{N}_2$   $[\text{M}+\text{H}]^+$ , Calcd: 339.2800, Found: 339.2806

**(1*R*,2*R*)-*N*-(cyclohexyl)-1,2-diphenyl ethylenediamine(1e)<sup>1</sup>**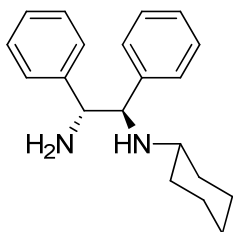

$[\alpha]_D^{25} +14.8$  ( $c = 31.8$ ,  $\text{CHCl}_3$ ), IR (KBr): 3362, 3027, 2933, 2847, 1609, 1458, 751, 706  $\text{cm}^{-1}$ ;  $^1\text{H}$  NMR (300 MHz,  $\text{CDCl}_3$ )  $\delta$  7.23 – 7.10 (m, 10H), 3.95 (d, 1H,  $J = 6.9$  Hz), 3.85 (d, 1H,  $J = 6.9$  Hz), 2.23 – 2.16 (m, 1H), 1.69 (s, 3H), 1.88 – 1.47 (m, 5H), 1.10 – 0.90 (m, 5H);  $^{13}\text{C}$  NMR (100 MHz,  $\text{CDCl}_3$ )  $\delta$  143.4, 142.2, 127.8 (2C), 127.7 (2C), 127.5 (2C), 126.9 (2C), 126.6, 126.5, 66.1, 61.9, 53.3, 34.7, 32.4, 26.0, 24.9, 24.4; HRMS (FAB<sup>+</sup>) for  $\text{C}_{20}\text{H}_{27}\text{N}_2$   $[\text{M}+\text{H}]^+$ , Calcd: 295.2174, Found: 295.2178

**(S)-2-(N-Phenyl hydroxyamino)-cyclohexanone(2a)<sup>2</sup>**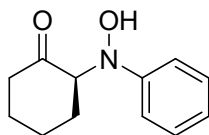

$[\alpha]_D^{25} +189.2$  ( $c = 9.8$ ,  $\text{CHCl}_3$ ), IR (KBr) : 3398, 3058, 2937, 1712, 1598, 1492, 1448, 1400, 1290, 1122, 935  $\text{cm}^{-1}$ ;  $^1\text{H}$  NMR (300 MHz,  $\text{CDCl}_3$ )  $\delta$  7.26 (t, 2H,  $J = 8.4$  Hz, Ar- $H$ ), 7.05 (d, 2H,  $J = 7.5$  Hz, Ar- $H$ ), 6.94 (t, 1H,  $J = 7.2$  Hz, Ar- $H$ ), 6.27 (s, 1H, OH), 4.23 (t, 1H,  $J = 9.6$  Hz, CH), 1.63 – 2.58 (m, 8H, eight proton of  $\text{CH}_2$ );  $^{13}\text{C}$  NMR (75 MHz,  $\text{CDCl}_3$ )  $\delta$  209.7, 150.1, 128.6 (2C), 121.6, 115.9 (2C), 72.5, 42.0, 27.8, 27.2, 24.3; HRMS (FAB<sup>+</sup>) for  $\text{C}_{12}\text{H}_{15}\text{NO}_2$   $[\text{M}]^+$ , Calcd 205.1103, Found 205.1106; Enantiomeric excess was determined by HPLC with a Chiralpak AD-H column (97.6:2.4 hexane:2-propanol), 1.0 mL/min; major enantiomer  $t_r = 42.5$  min, minor enantiomer  $t_r = 50.3$  min.

## References

1. Shim, J.H.; Kim, M.J.; Lee, J.Y.; Kim, K.H.; Ha, D.C. Organocatalytic Asymmetric Aldol Reaction Using Protonated Chiral 1,2-Diamines. *Tetrahedron Lett.* **2020**, *61*, 152295.
2. Momiyama, N.; Yamamoto, H. Brønsted Acid Catalysis of Achiral Enamine for Regio- and Enantioselective Nitroso Aldol Synthesis. *J. Am. Chem. Soc.* **2005**, *127*, 4, 1080–1081.
3. Li, Y.; Zhang, L.; Yan, N.; Meng, X.; Zhao, Y. Acid/Base-Co-catalyzed Direct Oxidativea-Amination of CyclicKetones: Using Molecular Oxygen as the Oxidant. *Adv. Synth. Catal.* **2018**, *360*, 455–461.

## Copy of catalysts and products data ( $^1\text{H}$ , $^{13}\text{C}$ NMR, HR-MS)

### $^1\text{H}$ NMR(1a)

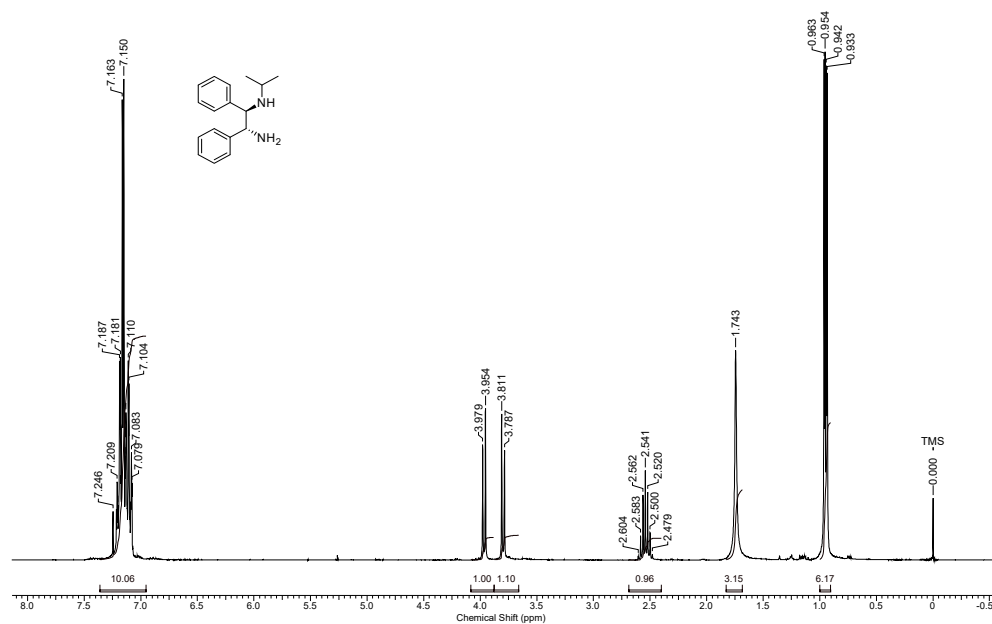

### $^{13}\text{C}$ NMR(1a)

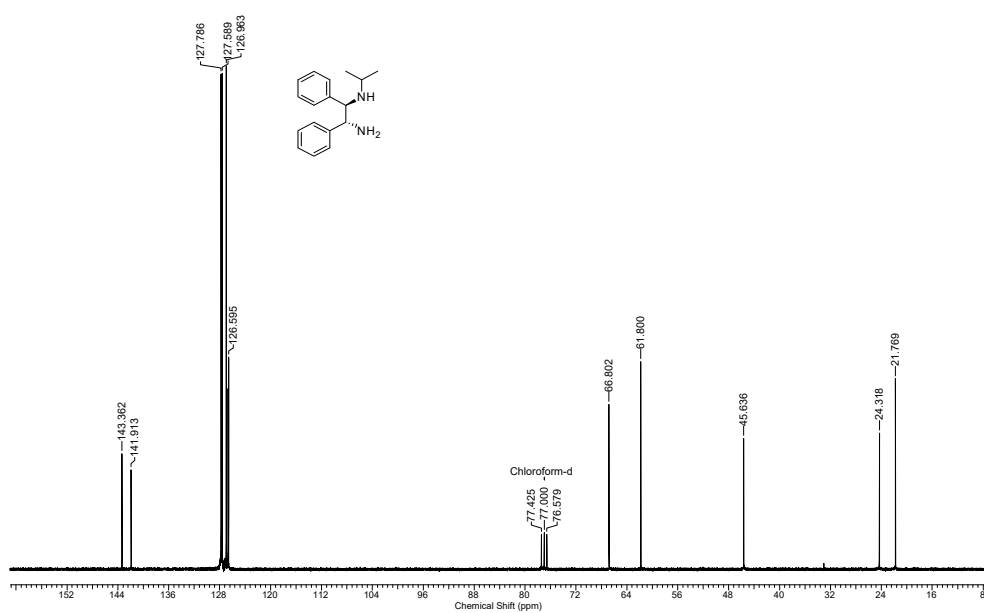



**HR-MS(1a)**

Note : in MC with NBA  
Inlet : Direct Ion Mode : FAB+  
RT : 2.52 min Scan#: 28  
Elements : C 17/0, H 23/0, N 2/0  
Mass Tolerance : 5ppm, 5mmu if m/z > 1000  
Unsaturation (U.S.) : 0.0 - 100.0

| Observed m/z | Int% | Err[ppm / mmu] | U.S. | Composition   |
|--------------|------|----------------|------|---------------|
| 255.1863     | 58.9 | +0.8 / +0.2    | 7.5  | C 17 H 23 N 2 |

**$^1\text{H}$  NMR(1b)**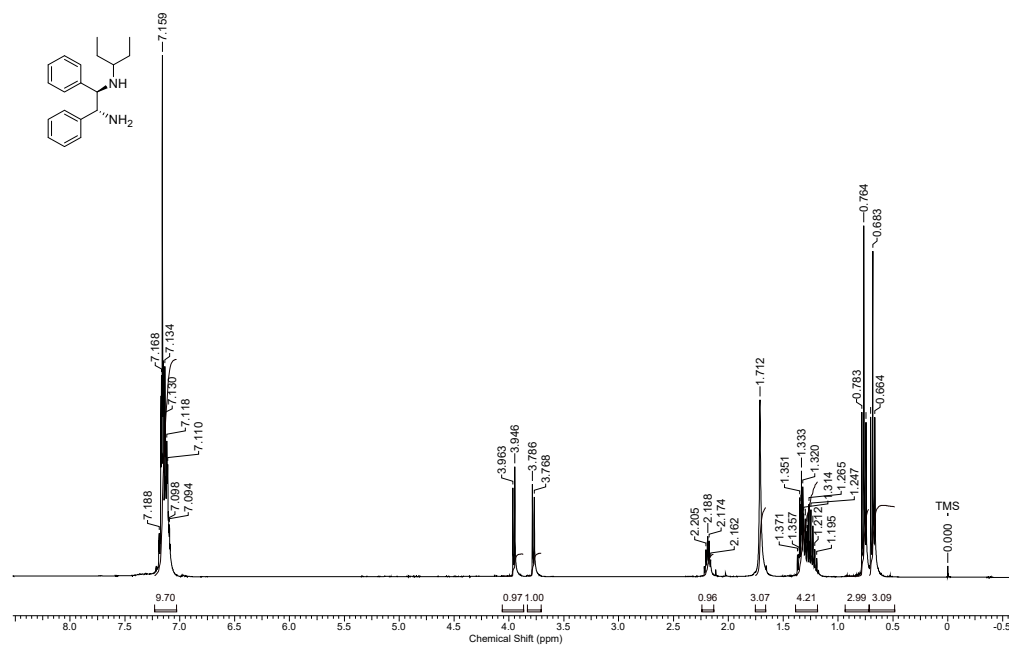 **$^{13}\text{C}$  NMR(1b)**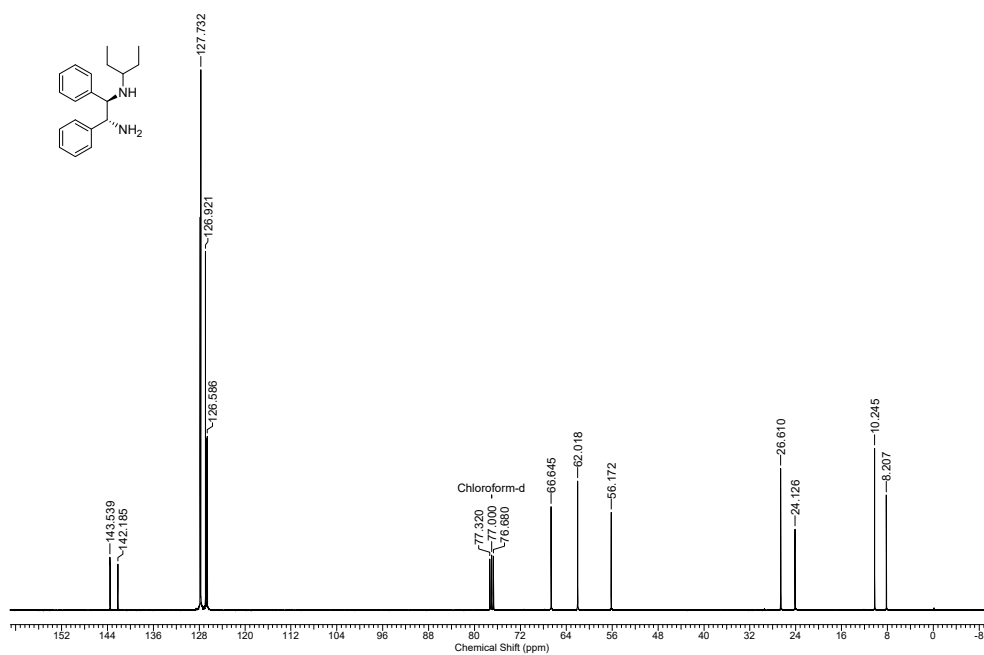

## HR-MS(1b)

Note : in MC with NBA  
Inlet : Direct Ion Mode : FAB+  
RT : 0.75 min Scan#: 10  
Elements : C 19/0, H 27/0, N 2/0  
Mass Tolerance : 20ppm, 5mmu if m/z > 250  
Unsaturation (U.S.) : 0.0 - 100.0

| Observed m/z | Int%  | Err[ppm / mmu] | U.S. | Composition   |
|--------------|-------|----------------|------|---------------|
| 283.2176     | 100.0 | +0.5 / +0.1    | 7.5  | C 19 H 27 N 2 |

Chemical structure of (S)-1-(1-((S)-1-aminopropyl)-2-phenylethyl)-2-phenylethylamine:

CC[C@H](N)[C@@H](c1ccccc1)[C@H](Nc2ccccc2)Cc3ccccc3

<sup>1</sup>H NMR spectrum (400 MHz, CDCl<sub>3</sub>) showing peaks (ppm) and integrations:

| Chemical Shift (ppm)                                                 | Integration |
|----------------------------------------------------------------------|-------------|
| 7.169, 7.162, 7.135, 7.116, 7.122                                    | 9.65        |
| 7.237, 7.198                                                         |             |
| 3.968, 3.950, 3.794, 3.776                                           | 1.13, 1.13  |
| 2.287, 2.275, 2.262, 2.247                                           | 1.13        |
| 1.690                                                                | 3.00        |
| 1.295, 1.284, 1.338, 1.327, 1.262, 1.229, 1.127, 1.108, 1.070, 1.088 | 6.27        |
| 0.825, 0.724, 0.742, 0.806                                           | 3.19, 3.21  |
| 0.000 (TMS)                                                          |             |

CC(C)C[C@H](N)[C@@H](N)Cc1ccccc1  

Chemical Shift (ppm): 142.327, 143.628, 126.646, 126.981, 127.836, 77.000, 76.688, 77.320, 66.831, 62.033, 53.665, 37.225, 35.232, 18.966, 17.669, 14.173, 14.478.

Solvent: Chloroform-d

## HR-MS(1c)

Note : in MC with NBA  
Inlet : Direct Ion Mode : FAB+  
RT : 1.75 min Scan#: 22  
Elements : C 20/0, H 27/0, N 2/0  
Mass Tolerance : 5ppm, 5mmu if m/z > 1000  
Unsaturation (U.S.) : 0.0 - 100.0

| Observed m/z | Int%  | Err[ppm / mmu] | U.S. | Composition   |
|--------------|-------|----------------|------|---------------|
| 295.2178     | 100.0 | +1.4 / +0.4    | 8.5  | C 20 H 27 N 2 |

**$^1\text{H}$  NMR(1d)**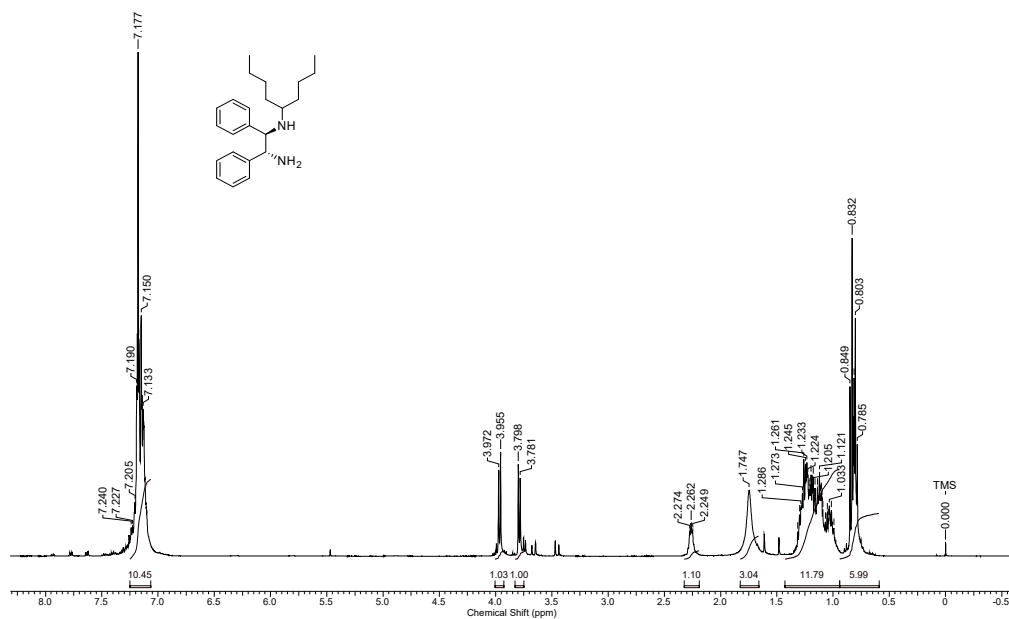 **$^{13}\text{C}$  NMR(1d)**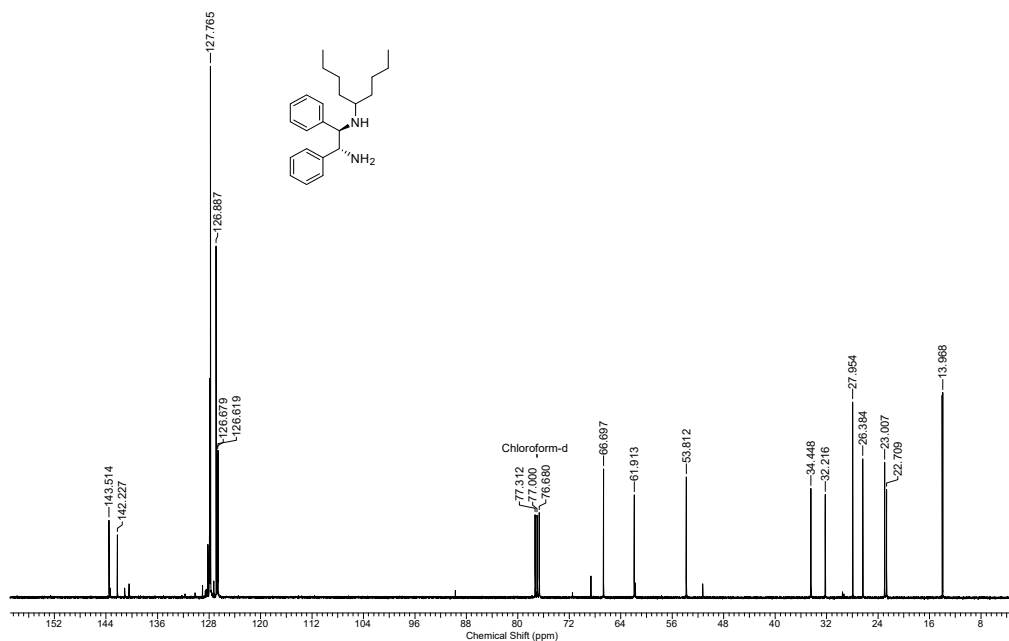

**HR-MS(1d)**

Note : in MC with NBA

Inlet : Direct

Ion Mode : FAB+

RT : 1.96 min

Scan#: 26

Elements : C 23/0, H 35/0, N 2/0

Mass Tolerance : 20ppm, 50mmu if m/z &gt; 2500

Unsaturation (U.S.) : 0.0 - 100.0

| Observed m/z | Int%  | Err[ppm / mmu] | U.S. | Composition   |
|--------------|-------|----------------|------|---------------|
| 339.2806     | 100.0 | +1.6 / +0.6    | 7.5  | C 23 H 35 N 2 |

**$^1\text{H}$  NMR(1e)**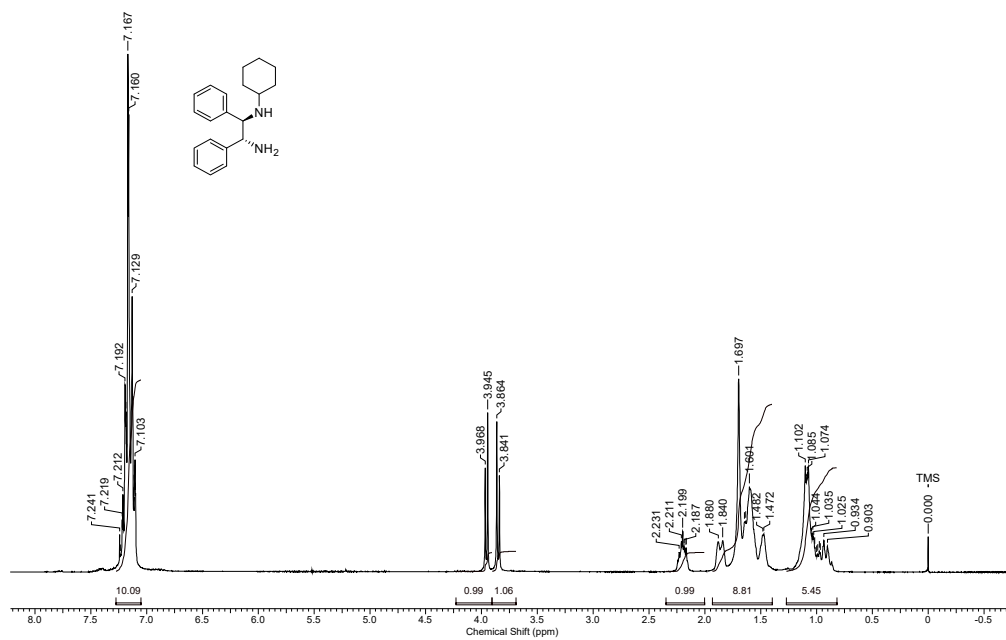 **$^{13}\text{C}$  NMR(1e)**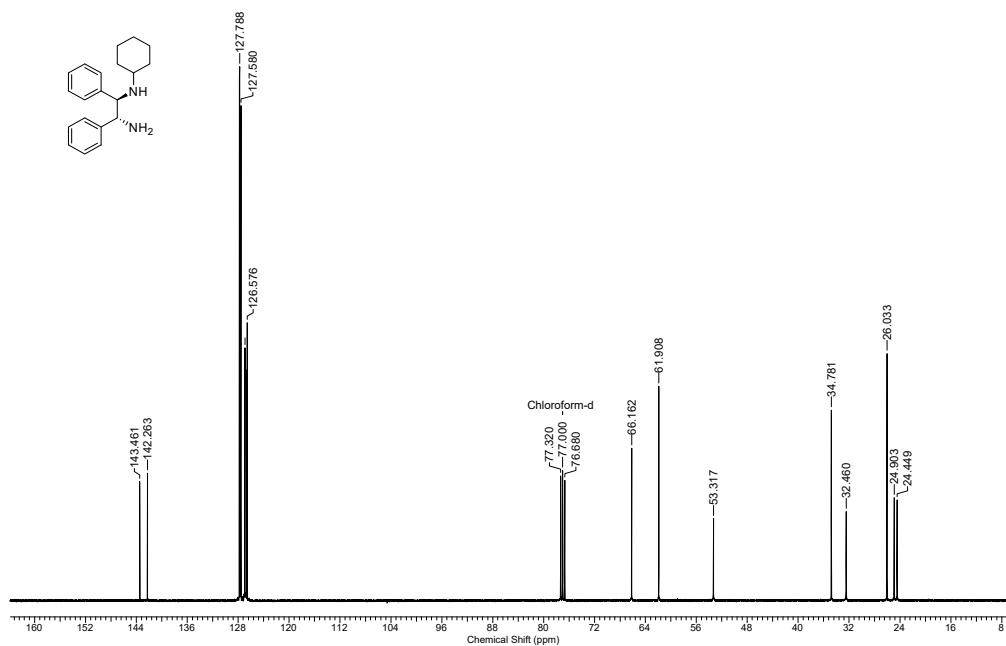



**HR-MS(1e)**

Note : in MC with NBA

Inlet : Direct

Ion Mode : FAB+

RT : 1.75 min

Scan#: 22

Elements : C 20/0, H 27/0, N 2/0

Mass Tolerance : 5ppm, 5mmu if m/z > 1000

Unsaturation (U.S.) : 0.0 - 100.0

| Observed m/z | Int%  | Err [ppm / mmu] | U.S. | Composition   |
|--------------|-------|-----------------|------|---------------|
| 295.2178     | 100.0 | +1.4 / +0.4     | 8.5  | C 20 H 27 N 2 |

**$^1\text{H}$  NMR(2a)**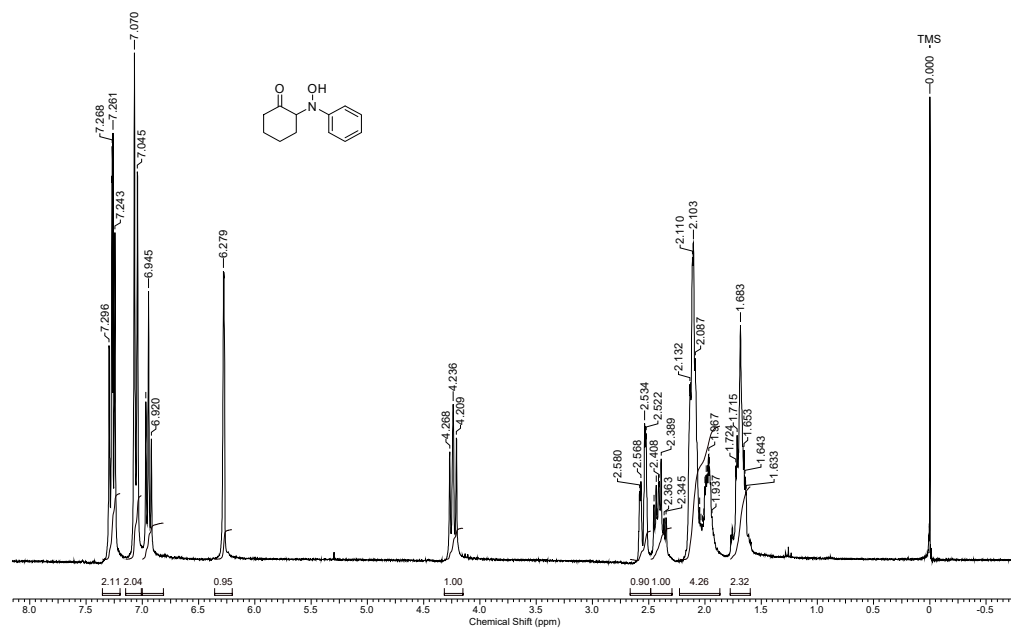 **$^{13}\text{C}$  NMR(2a)**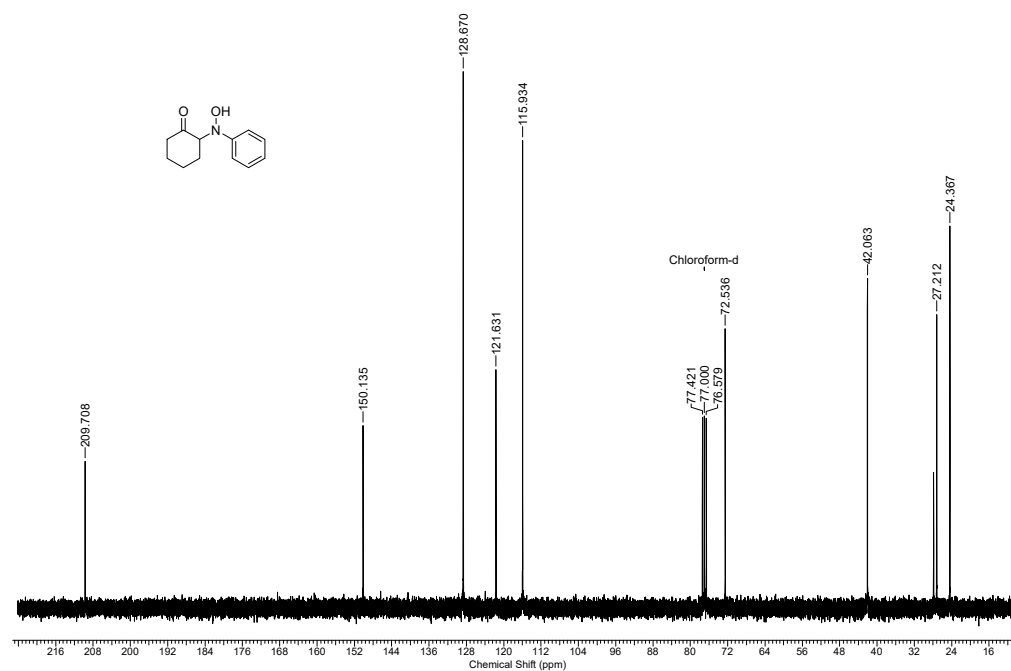

**HR-MS(2a)**

Note : in with MC

Inlet : Direct

Ion Mode : FAB+

RT : 3.10 min

Scan#: 33

Elements : C 12/0, H 15/0, O 2/0, N 1/0

Mass Tolerance : 20ppm, 50mmu if m/z &gt; 2500

Unsaturation (U.S.) : 0.0 - 100.0

|               |             |      |    |    |   |   |
|---------------|-------------|------|----|----|---|---|
| Observed m/z  | Int%        |      |    |    |   |   |
| 205.1106      | 18.2        |      |    |    |   |   |
| Estimated m/z | Error [ppm] | U.S. | C  | H  | O | N |
| 205.1103      | +1.7        | 6.0  | 12 | 15 | 2 | 1 |

### Copy of table data (HPLC Chromatograms)

#### 2-(*N*-Phenyl hydroxyamino)-cyclohexanone (racemic)

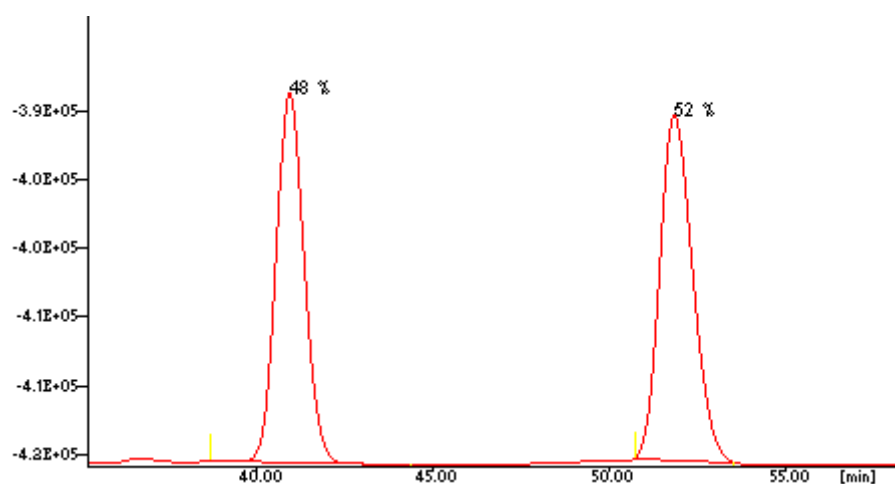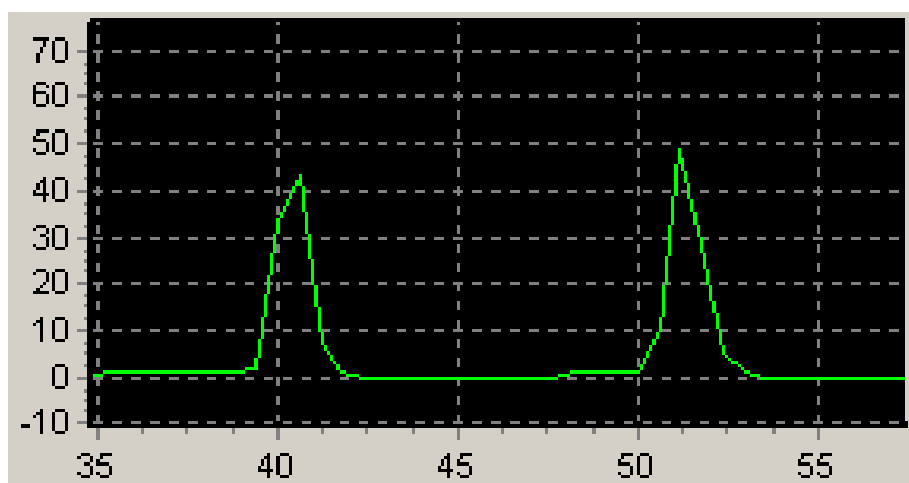

| Peak Name | RT (min) | % Area | ee (%) |
|-----------|----------|--------|--------|
| (S)       | 40.95    | 48     | -      |
| (R)       | 51.85    | 52     |        |

**(Table 1, entry 1)**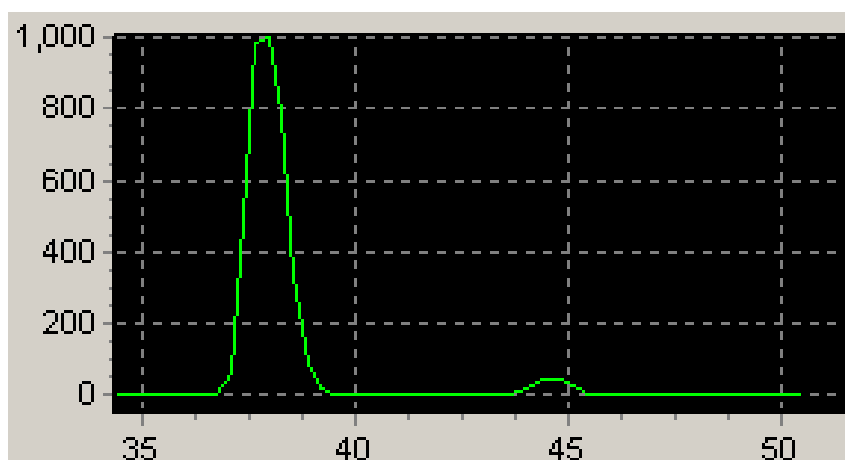

| Peak Name | RT (min) | % Area | ee (%) |
|-----------|----------|--------|--------|
| (S)       | 38.29    | 97     | 94     |
| (R)       | 44.60    | 3      |        |

**(Table 1, entry 2)**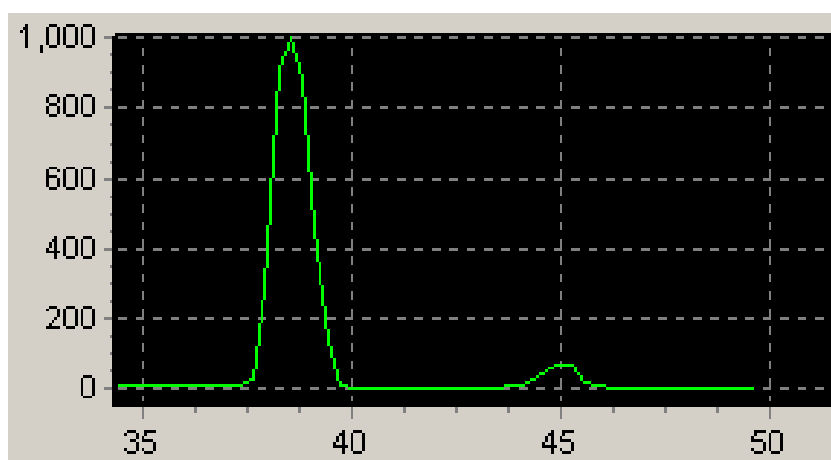

| Peak Name | RT (min) | % Area | ee (%) |
|-----------|----------|--------|--------|
| (S)       | 38.87    | 95.5   | 91     |
| (R)       | 45.38    | 4.5    |        |

(Table 1, entry 3)

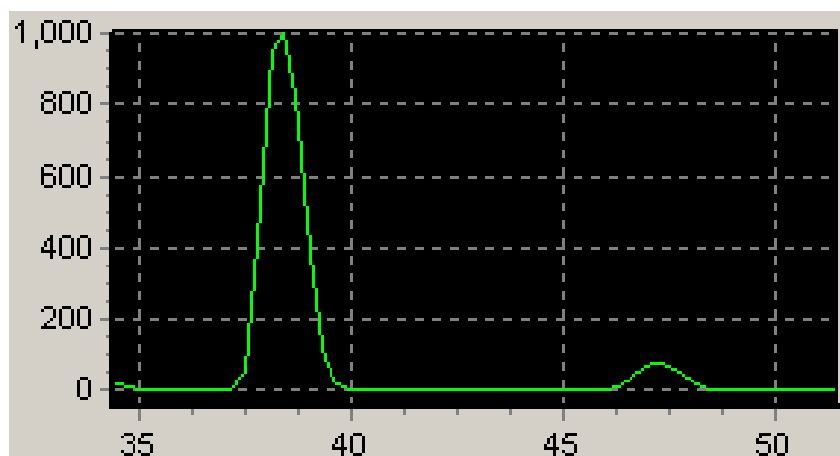

| Peak Name | RT (min) | % Area | ee (%) |
|-----------|----------|--------|--------|
| (S)       | 38.95    | 95     | 90     |
| (R)       | 47.56    | 5      |        |

(Table 1, entry 4)

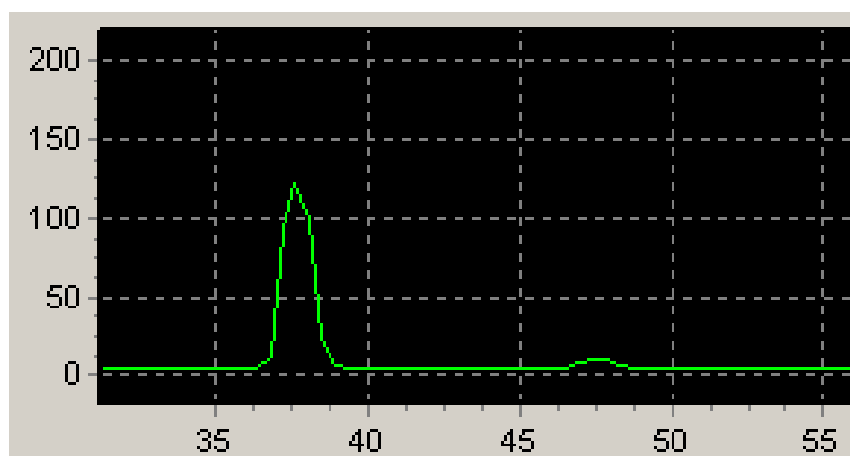

| Peak Name | RT (min) | % Area | ee (%) |
|-----------|----------|--------|--------|
| (S)       | 38.19    | 95     | 90     |
| (R)       | 48.14    | 5      |        |

**(Table 1, entry 5)**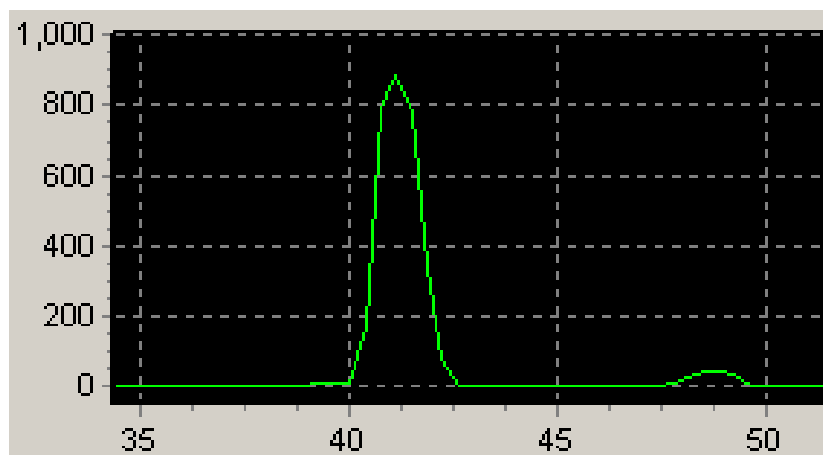

| Peak Name | RT (min) | % Area | ee (%) |
|-----------|----------|--------|--------|
| (S)       | 41.23    | 96     | 92     |
| (R)       | 49.12    | 4      |        |

**(Table 1, entry 6)**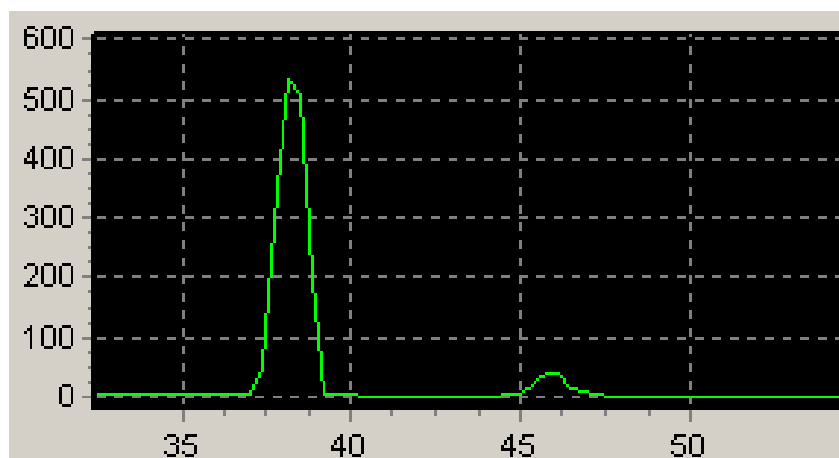

| Peak Name | RT (min) | % Area | ee (%) |
|-----------|----------|--------|--------|
| (S)       | 38.86    | 90.5   | 81     |
| (R)       | 46.05    | 9.5    |        |

(Table 1, entry 7)

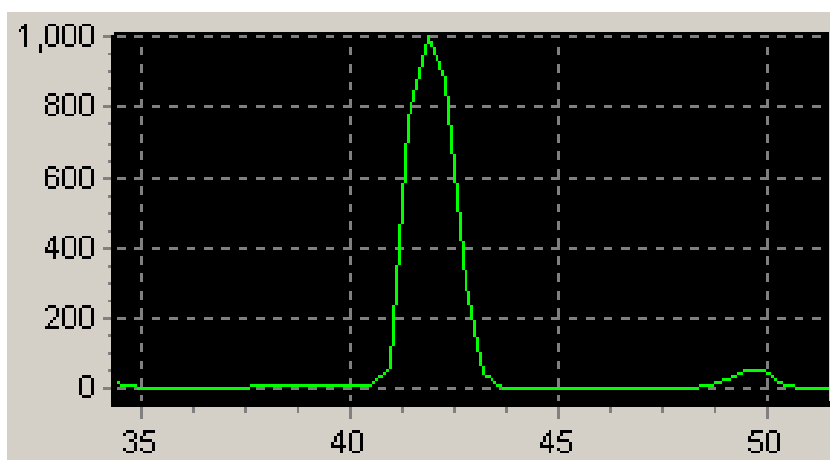

| Peak Name | RT (min) | % Area | ee (%) |
|-----------|----------|--------|--------|
| (S)       | 42.53    | 97     | 94     |
| (R)       | 49.24    | 3      |        |

(Table 1, entry 8)

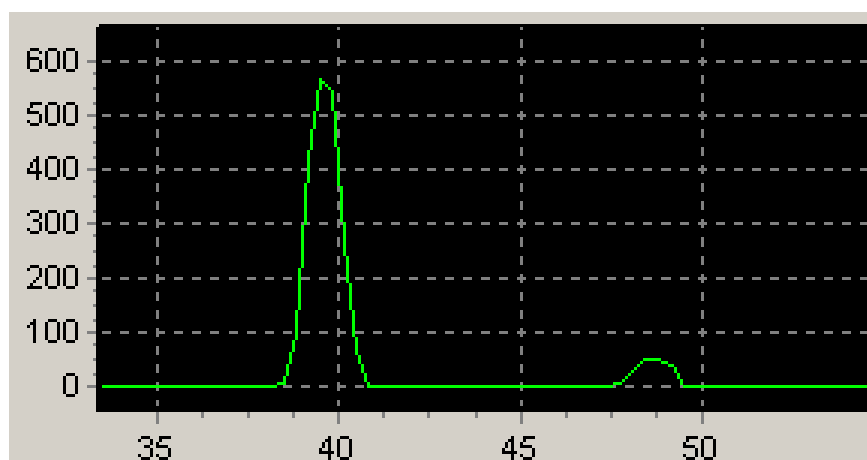

| Peak Name | RT (min) | % Area | ee (%) |
|-----------|----------|--------|--------|
| (S)       | 39.19    | 93     | 86     |
| (R)       | 48.86    | 7      |        |



**(Table 2, entry 1)**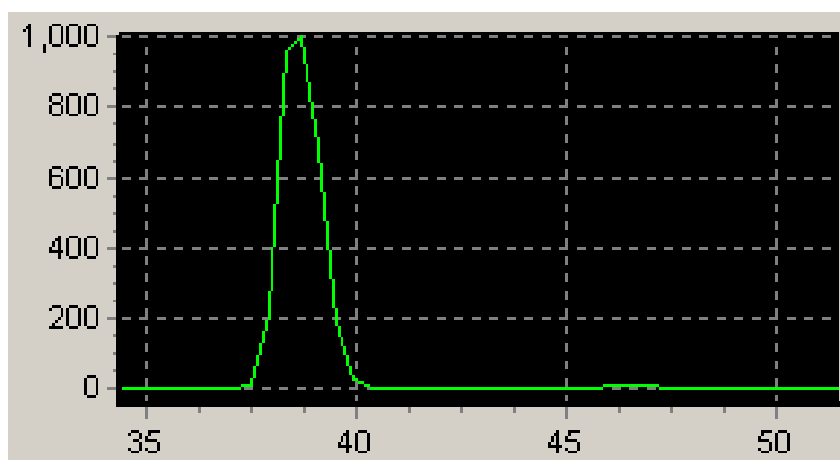

| Peak Name | RT (min) | % Area | ee (%) |
|-----------|----------|--------|--------|
| (S)       | 39.18    | 99.5   | 99     |
| (R)       | 46.84    | 0.5    |        |

**(Table 2, entry 3)**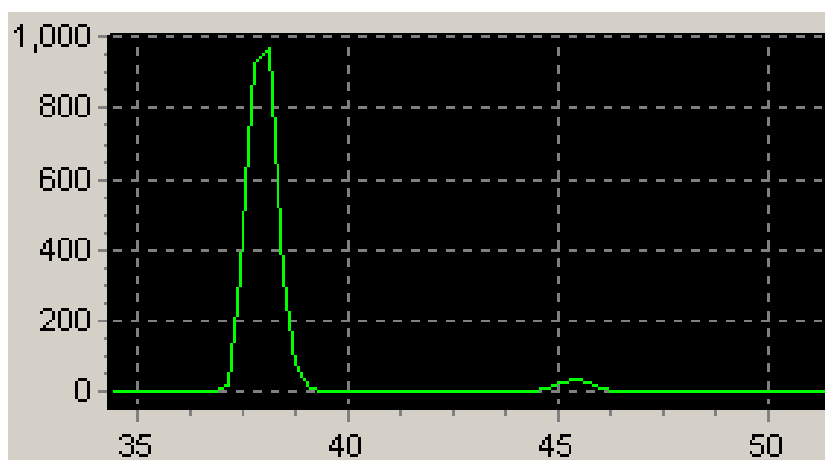

| Peak Name | RT (min) | % Area | ee (%) |
|-----------|----------|--------|--------|
| (S)       | 38.82    | 98     | 96     |
| (R)       | 45.34    | 2      |        |

**(Table 2, entry 4)**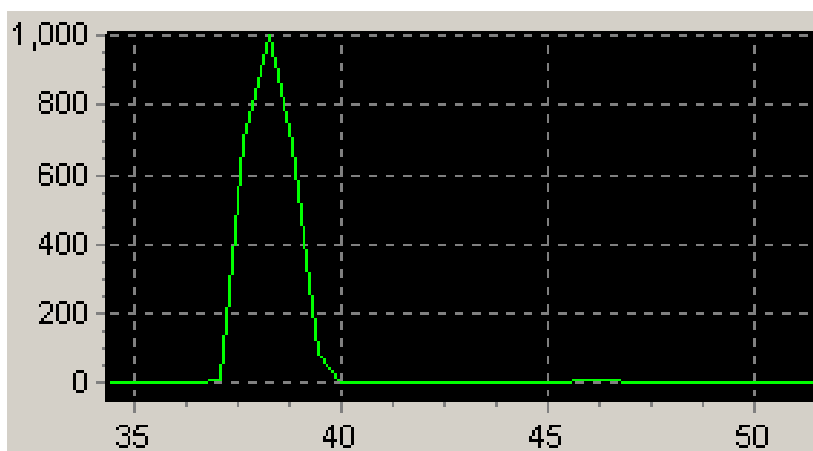

| Peak Name | RT (min) | % Area | ee (%) |
|-----------|----------|--------|--------|
| (S)       | 38.81    | 99     | 98     |
| (R)       | 46.51    | 1      |        |

**(Table 2, entry 5)**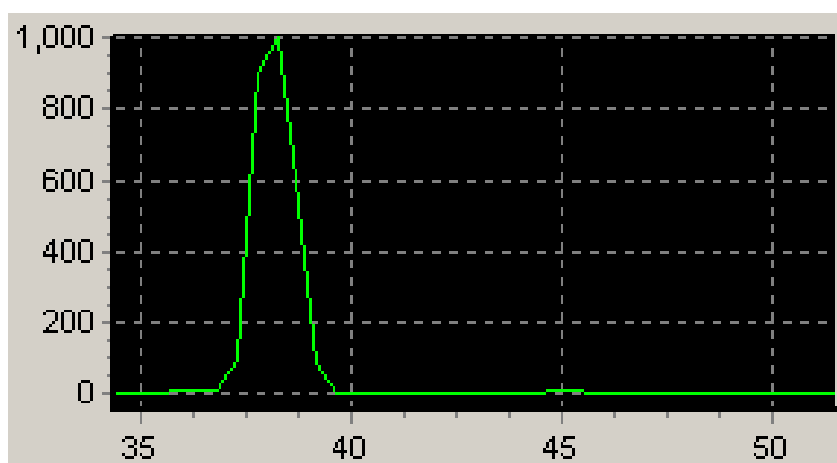

| Peak Name | RT (min) | % Area | ee (%) |
|-----------|----------|--------|--------|
| (S)       | 38.88    | 99     | 98     |
| (R)       | 45.02    | 1      |        |

**(Table 3, entry 1)**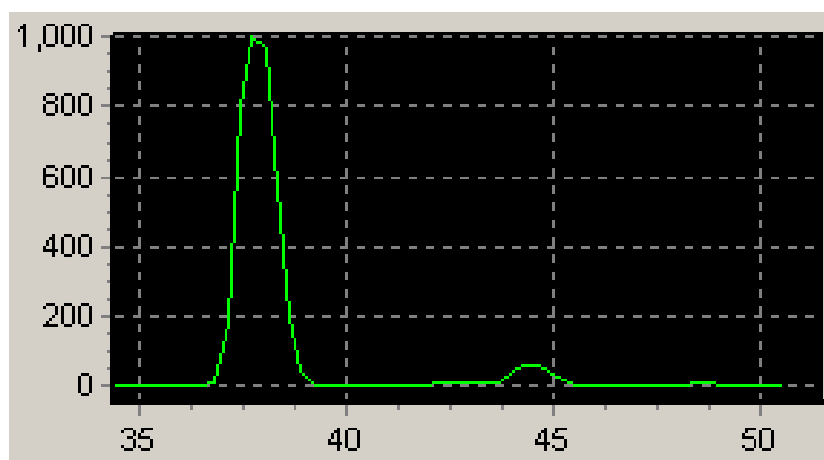

| Peak Name | RT (min) | % Area | ee (%) |
|-----------|----------|--------|--------|
| (S)       | 38.11    | 96     | 92     |
| (R)       | 44.74    | 4      |        |

**(Table 3, entry 2)**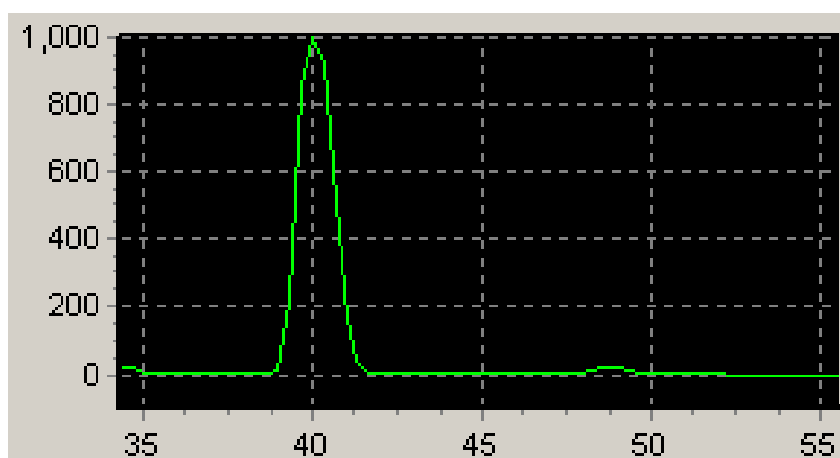

| Peak Name | RT (min) | % Area | ee (%) |
|-----------|----------|--------|--------|
| (S)       | 40.03    | 99     | 98     |
| (R)       | 49.02    | 1      |        |

**(Table 3, entry 3)**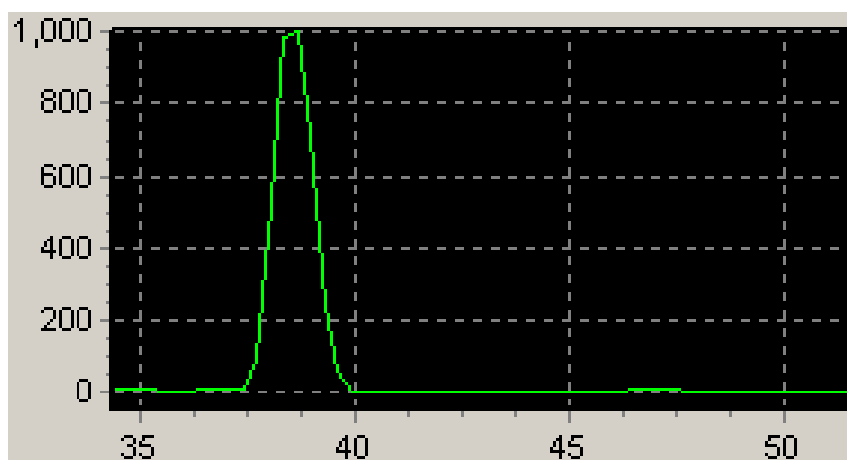

| Peak Name | RT (min) | % Area | ee (%) |
|-----------|----------|--------|--------|
| (S)       | 39.10    | 99.5   | 99     |
| (R)       | 47.12    | 0.5    |        |

**(Table 3, entry 4)**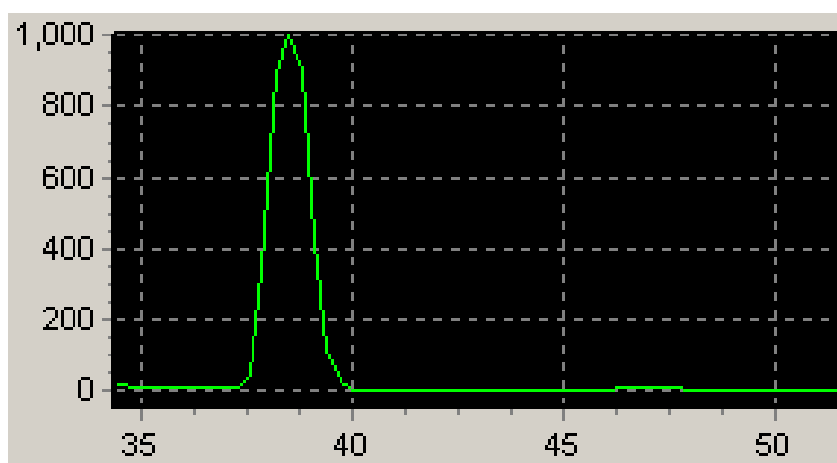

| Peak Name | RT (min) | % Area | ee (%) |
|-----------|----------|--------|--------|
| (S)       | 38.84    | 99.5   | 99     |
| (R)       | 46.24    | 0.5    |        |

(Table 3, entry 5)

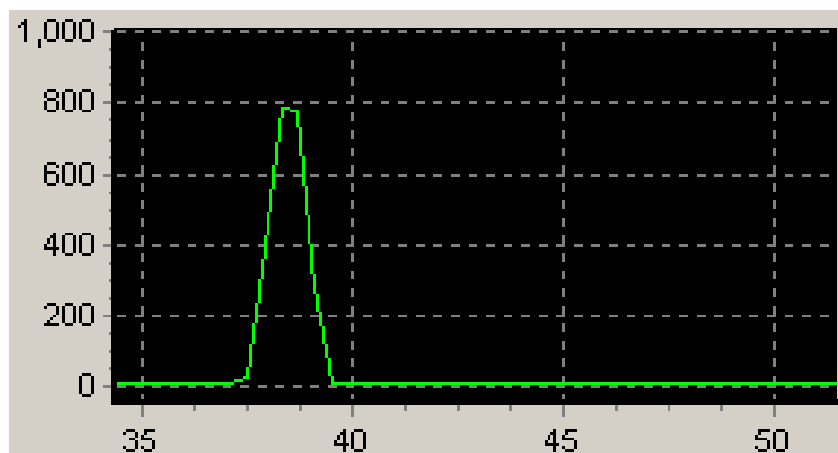

| Peak Name | RT (min) | % Area | ee (%) |
|-----------|----------|--------|--------|
| (S)       | 38.75    | >99.5  | >99.5  |
| (R)       |          |        |        |

(Table 3, entry 6)

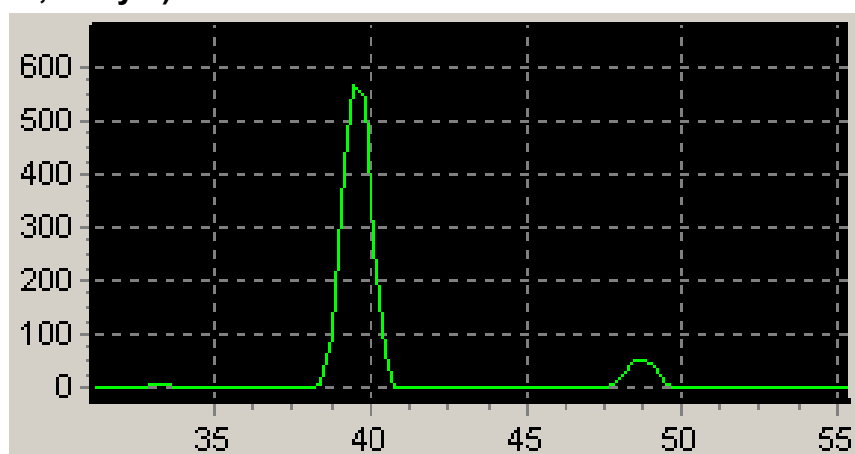

| Peak Name | RT (min) | % Area | ee (%) |
|-----------|----------|--------|--------|
| (S)       | 39.29    | 91     | 82     |
| (R)       | 48.85    | 9      |        |

(Table 3, entry 7)

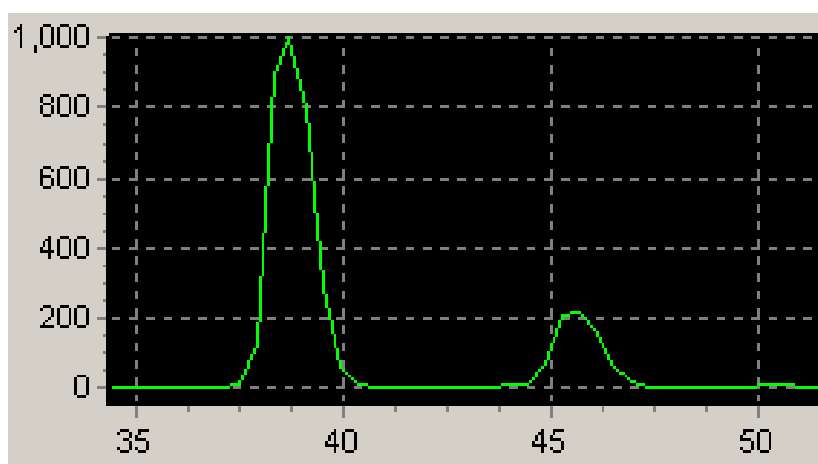

| Peak Name | RT (min) | % Area | ee (%) |
|-----------|----------|--------|--------|
| (S)       | 39.01    | 90     | 80     |
| (R)       | 45.65    | 10     |        |

(Table 3, entry 8)

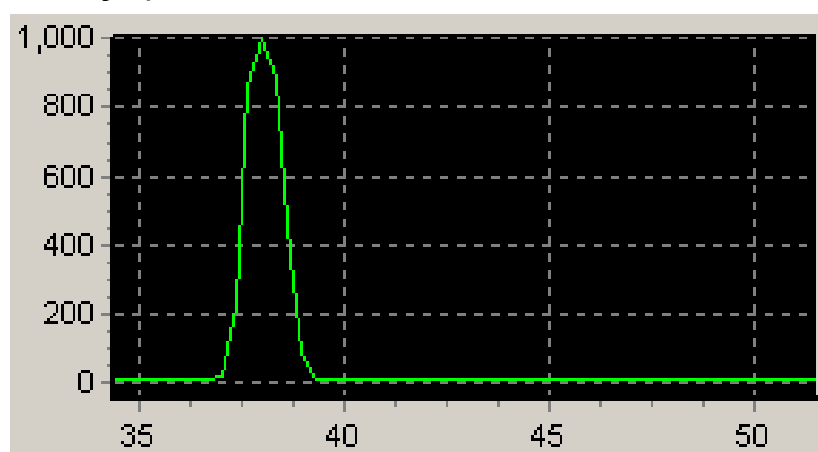

| Peak Name | RT (min) | % Area | ee (%) |
|-----------|----------|--------|--------|
| (S)       | 38.45    | >99.5  | >99.5  |
| (R)       |          |        |        |

### Computational results of DFT Calculations for all calculated

structures.

**Figure 4.**

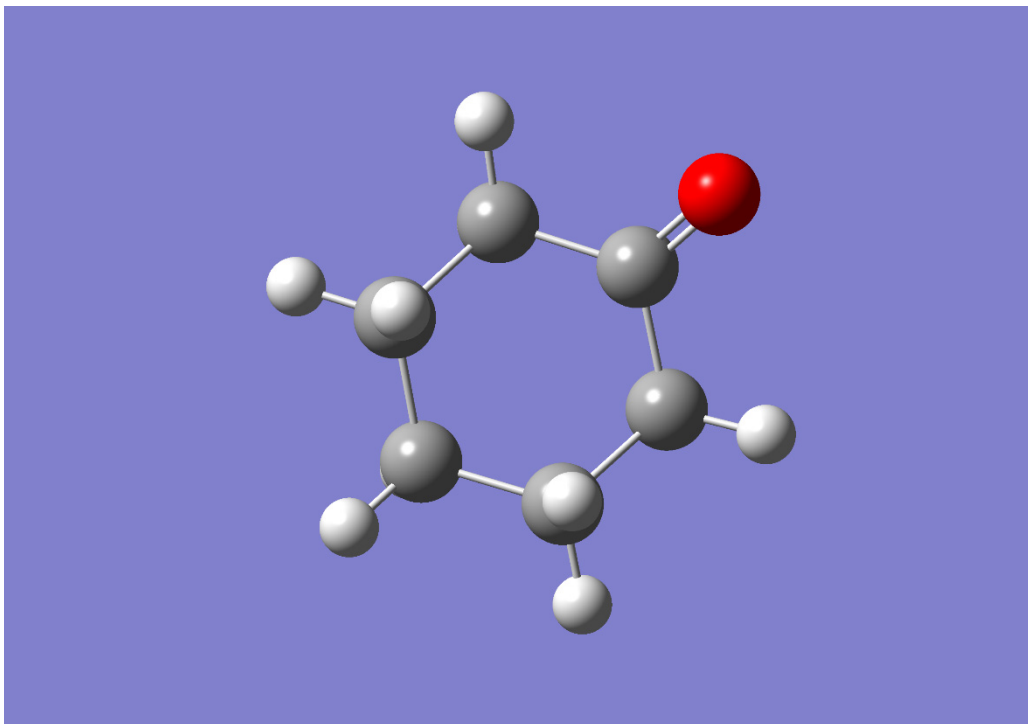

**Cyclohexanone-gas(1)**

Temperature = 298.15 Kelvin

Pressure = 1 atm

Frequencies scaled by = 1

Electronic Energy (EE) = -308.19162 Hartree

Zero-point Energy Correction = 0.162365 Hartree

Thermal Correction to Energy = 0.168434 Hartree

Thermal Correction to Enthalpy = 0.169378 Hartree

Thermal Correction to Free Energy = 0.132343 Hartree

EE + Zero-point Energy = -308.02926 Hartree

EE + Thermal Energy Correction = -308.02319 Hartree

EE + Thermal Enthalpy Correction = -308.02224 Hartree

EE + Thermal Free Energy Correction = -308.05928 Hartree

E (Thermal) = 105.694 kcal/mol

Heat Capacity (Cv) = 22.782 cal/mol-kelvin

Entropy (S) = 77.947 cal/mol-kelvin

Symbolic Z-matrix:

Charge = 0 Multiplicity = 1

|   |          |          |          |
|---|----------|----------|----------|
| C | -0.18033 | 1.02034  | 1.26399  |
| C | -0.87411 | 1.5609   | 0.       |
| C | -0.18033 | 1.02034  | -1.26399 |
| C | -0.18033 | -0.52675 | -1.26995 |
| C | 0.44993  | -1.06087 | 0.       |
| C | -0.18033 | -0.52675 | 1.26995  |
| H | -0.67881 | 1.38437  | -2.1547  |
| H | -1.9161  | 1.25379  | 0.       |
| H | -0.85159 | 2.64511  | 0.       |
| H | 0.84421  | 1.37736  | 1.29194  |
| H | -0.67881 | 1.38437  | 2.1547   |
| H | -1.20747 | -0.87863 | -1.31895 |
| H | 0.36312  | -0.91763 | -2.11915 |
| H | -1.20747 | -0.87863 | 1.31895  |
| H | 0.36312  | -0.91763 | 2.11915  |
| H | 0.84421  | 1.37736  | -1.29194 |
| O | 1.37483  | -1.84414 | 0.       |

**Cyclohexanone-water(1)**



Temperature = 298.15 Kelvin

Pressure = 1 atm

Frequencies scaled by = 1

Electronic Energy (EE) = -308.19847 Hartree

Zero-point Energy Correction = 0.162138 Hartree

Thermal Correction to Energy = 0.168209 Hartree

Thermal Correction to Enthalpy = 0.169153 Hartree

Thermal Correction to Free Energy = 0.132108 Hartree

EE + Zero-point Energy = -308.03634 Hartree

EE + Thermal Energy Correction = -308.03026 Hartree

EE + Thermal Enthalpy Correction = -308.02932 Hartree

EE + Thermal Free Energy Correction = -308.06637 Hartree

E (Thermal) = 105.553 kcal/mol

Heat Capacity (Cv) = 22.803 cal/mol-kelvin

Entropy (S) = 77.967 cal/mol-kelvin

Symbolic Z-matrix:

Charge = 0 Multiplicity = 1

|   |          |          |          |
|---|----------|----------|----------|
| C | -0.18033 | 1.02034  | 1.26399  |
| C | -0.87411 | 1.5609   | 0.       |
| C | -0.18033 | 1.02034  | -1.26399 |
| C | -0.18033 | -0.52675 | -1.26995 |
| C | 0.44993  | -1.06087 | 0.       |
| C | -0.18033 | -0.52675 | 1.26995  |
| H | -0.67881 | 1.38437  | -2.1547  |
| H | -1.9161  | 1.25379  | 0.       |
| H | -0.85159 | 2.64511  | 0.       |

---

|   |          |          |          |
|---|----------|----------|----------|
| H | 0.84421  | 1.37736  | 1.29194  |
| H | -0.67881 | 1.38437  | 2.1547   |
| H | -1.20747 | -0.87863 | -1.31895 |
| H | 0.36312  | -0.91763 | -2.11915 |
| H | -1.20747 | -0.87863 | 1.31895  |
| H | 0.36312  | -0.91763 | 2.11915  |
| H | 0.84421  | 1.37736  | -1.29194 |
| O | 1.37483  | -1.84414 | 0.       |

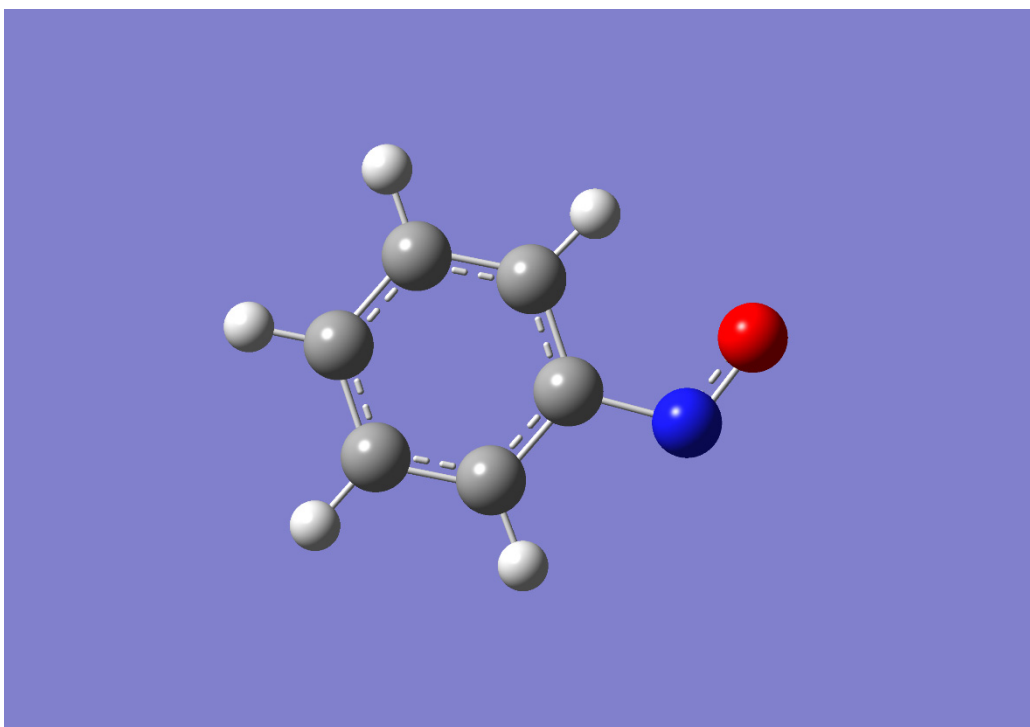**Nitrosobenzene-gas(2)**

Temperature = 298.15 Kelvin

Pressure = 1 atm

Frequencies scaled by = 1

Electronic Energy (EE) = -359.53313 Hartree

Zero-point Energy Correction = 0.097794 Hartree

Thermal Correction to Energy = 0.103841 Hartree

Thermal Correction to Enthalpy = 0.104785 Hartree

Thermal Correction to Free Energy = 0.067536 Hartree

EE + Zero-point Energy = -359.43533 Hartree

EE + Thermal Energy Correction = -359.42929 Hartree

EE + Thermal Enthalpy Correction = -359.42834 Hartree

EE + Thermal Free Energy Correction = -359.46559 Hartree

E (Thermal) = 65.161 kcal/mol

Heat Capacity (Cv) = 22.921 cal/mol-kelvin

Entropy (S) = 78.398 cal/mol-kelvin

Symbolic Z-matrix:

Charge = 0 Multiplicity = 1

|   |          |          |          |
|---|----------|----------|----------|
| O | 2.74053  | 0.37856  | -0.00008 |
| C | 0.55208  | -0.25309 | -0.00001 |
| C | -0.36713 | -1.30821 | 0.00002  |
| C | 0.11304  | 1.07824  | -0.00001 |
| C | -1.73353 | -1.03397 | 0.00005  |
| H | 0.00617  | -2.32465 | 0.00001  |
| C | -1.24751 | 1.35223  | 0.00003  |
| H | 0.86379  | 1.85631  | -0.00003 |
| C | -2.172   | 0.29466  | 0.00006  |
| H | -2.45182 | -1.84403 | 0.00008  |
| H | -1.59825 | 2.37688  | 0.00003  |
| H | -3.2337  | 0.51064  | 0.00009  |
| N | 1.9457   | -0.6261  | -0.00005 |

**Nitrosobenzene-water(2)**

Temperature = 298.15 Kelvin

Pressure = 1 atm

Frequencies scaled by = 1

Electronic Energy (EE) = -359.5391 Hartree

Zero-point Energy Correction = 0.097803 Hartree

Thermal Correction to Energy = 0.103851 Hartree

Thermal Correction to Enthalpy = 0.104795 Hartree

Thermal Correction to Free Energy = 0.06754 Hartree

EE + Zero-point Energy = -359.4413 Hartree

EE + Thermal Energy Correction = -359.43525 Hartree

EE + Thermal Enthalpy Correction = -359.43431 Hartree

EE + Thermal Free Energy Correction = -359.47156 Hartree

E (Thermal) = 65.167 kcal/mol

Heat Capacity (Cv) = 22.923 cal/mol-kelvin

Entropy (S) = 78.41 cal/mol-kelvin

Symbolic Z-matrix:

Charge = 0 Multiplicity = 1

|   |          |          |          |
|---|----------|----------|----------|
| O | 2.74053  | 0.37856  | -0.00008 |
| C | 0.55208  | -0.25309 | -0.00001 |
| C | -0.36713 | -1.30821 | 0.00002  |
| C | 0.11304  | 1.07824  | -0.00001 |
| C | -1.73353 | -1.03397 | 0.00005  |
| H | 0.00617  | -2.32465 | 0.00001  |
| C | -1.24751 | 1.35223  | 0.00003  |
| H | 0.86379  | 1.85631  | -0.00003 |

---

|   |          |          |          |
|---|----------|----------|----------|
| C | -2.172   | 0.29466  | 0.00006  |
| H | -2.45182 | -1.84403 | 0.00008  |
| H | -1.59825 | 2.37688  | 0.00003  |
| H | -3.2337  | 0.51064  | 0.00009  |
| N | 1.9457   | -0.6261  | -0.00005 |

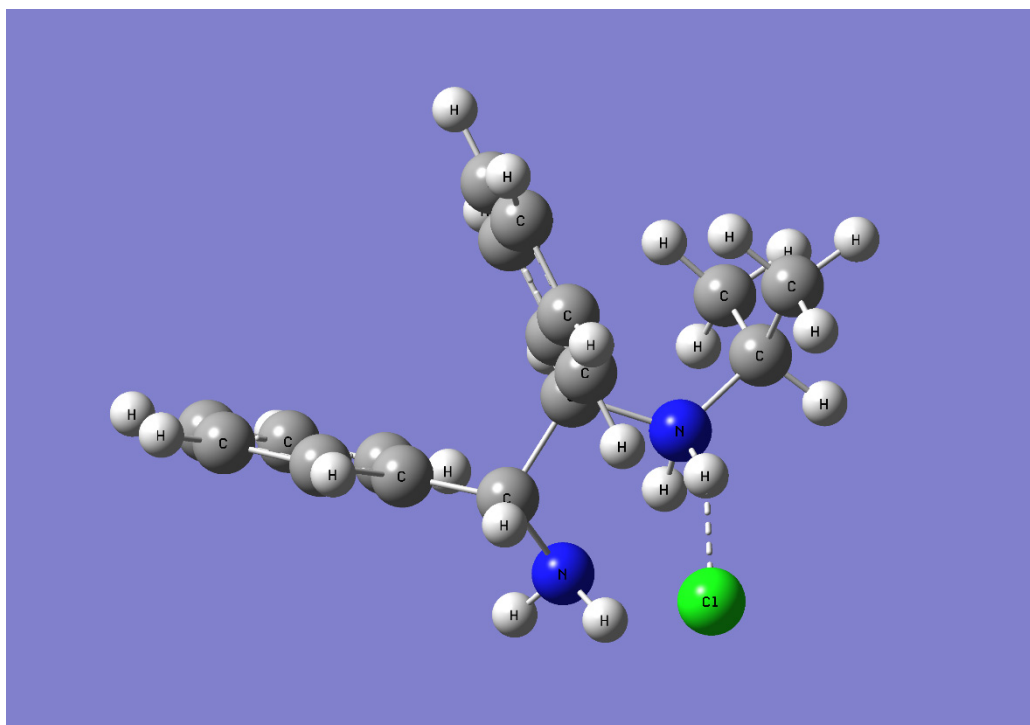**1a cat.-gas(3)**

Temperature = 298.15 Kelvin

Pressure = 1 atm

Frequencies scaled by = 1

Electronic Energy (EE) = -1224.9946 Hartree

Zero-point Energy Correction = 0.375214 Hartree

Thermal Correction to Energy = 0.394746 Hartree

Thermal Correction to Enthalpy = 0.395691 Hartree

Thermal Correction to Free Energy = 0.325221 Hartree

EE + Zero-point Energy = -1224.6194 Hartree

EE + Thermal Energy Correction = -1224.5999 Hartree

EE + Thermal Enthalpy Correction = -1224.599 Hartree

EE + Thermal Free Energy Correction = -1224.6694 Hartree

E (Thermal) = 247.707 kcal/mol

Heat Capacity (Cv) = 74.696 cal/mol-kelvin

Entropy (S) = 148.317 cal/mol-kelvin

Symbolic Z-matrix:

Charge = 0 Multiplicity = 1

|   |          |          |          |
|---|----------|----------|----------|
| C | -0.63346 | -0.98793 | 0.89695  |
| C | 0.29211  | -0.50444 | -0.28498 |
| N | 1.62729  | -1.19101 | -0.01139 |
| N | -0.29163 | -2.42775 | 1.13926  |
| H | -0.86115 | -3.06466 | 0.57262  |
| H | -0.33839 | -0.43525 | 1.79239  |
| H | -0.08851 | -0.93515 | -1.21245 |
| C | 0.33749  | 1.00418  | -0.39667 |
| C | -0.38065 | 1.62391  | -1.43022 |
| C | 1.014    | 1.80085  | 0.53985  |
| C | -0.42464 | 3.01623  | -1.52998 |
| H | -0.90973 | 1.01539  | -2.15537 |
| C | 0.97302  | 3.19337  | 0.43303  |
| H | 1.60236  | 1.34576  | 1.33053  |
| C | 0.25292  | 3.80516  | -0.59708 |
| H | -0.98349 | 3.48079  | -2.3338  |
| H | 1.5064   | 3.80001  | 1.15576  |
| H | 0.22336  | 4.88573  | -0.6737  |
| C | -2.09896 | -0.72142 | 0.59461  |
| C | -2.82463 | 0.18975  | 1.37243  |
| C | -2.74726 | -1.38616 | -0.45795 |



---

|    |          |          |          |
|----|----------|----------|----------|
| C  | -4.17461 | 0.43425  | 1.10593  |
| H  | -2.33211 | 0.70905  | 2.18717  |
| C  | -4.09622 | -1.14413 | -0.72358 |
| H  | -2.20521 | -2.09397 | -1.0771  |
| C  | -4.81349 | -0.23266 | 0.0579   |
| H  | -4.72403 | 1.14189  | 1.71566  |
| H  | -4.58569 | -1.66412 | -1.53867 |
| H  | -5.86035 | -0.04497 | -0.1495  |
| C  | 2.52351  | -1.54653 | -1.20242 |
| C  | 3.02007  | -0.27519 | -1.90367 |
| C  | 1.81059  | -2.51664 | -2.15457 |
| H  | 2.19129  | 0.2637   | -2.37057 |
| H  | 3.51833  | 0.3877   | -1.1897  |
| H  | 0.99691  | -2.02419 | -2.69563 |
| H  | 2.53493  | -2.876   | -2.8921  |
| H  | 3.3711   | -2.05663 | -0.73359 |
| Cl | 3.59864  | -0.09687 | 2.20182  |
| H  | 2.21708  | -0.67685 | 0.70155  |
| H  | 1.24181  | -2.07747 | 0.48897  |
| H  | 3.7381   | -0.55682 | -2.68035 |
| H  | 1.41219  | -3.38145 | -1.61399 |
| H  | -0.37044 | -2.68005 | 2.12842  |

**1a cat.-water(3)**

Temperature = 298.15 Kelvin

Pressure = 1 atm

Frequencies scaled by = 1

Electronic Energy (EE) = -1225.0267 Hartree

Zero-point Energy Correction = 0.374478 Hartree

Thermal Correction to Energy = 0.394565 Hartree

Thermal Correction to Enthalpy = 0.395509 Hartree

Thermal Correction to Free Energy = 0.32271 Hartree

EE + Zero-point Energy = -1224.6522 Hartree

EE + Thermal Energy Correction = -1224.6321 Hartree

EE + Thermal Enthalpy Correction = -1224.6312 Hartree

EE + Thermal Free Energy Correction = -1224.704 Hartree

E (Thermal) = 247.593 kcal/mol

Heat Capacity (Cv) = 75.543 cal/mol-kelvin

Entropy (S) = 153.22 cal/mol-kelvin

Symbolic Z-matrix:

Charge = 0 Multiplicity = 1

|   |          |          |          |
|---|----------|----------|----------|
| C | 1.0193   | 0.7182   | -0.05066 |
| C | 1.62873  | -0.59129 | -0.65061 |
| N | 0.56513  | -1.6836  | -0.50061 |
| N | -0.2408  | 1.02191  | -0.75972 |
| H | -0.26638 | 1.01429  | -1.75936 |
| H | 0.78004  | 0.5227   | 0.99581  |
| H | 1.7767   | -0.44864 | -1.72292 |
| C | 2.95141  | -0.94957 | 0.00258  |

---

|   |         |          |          |
|---|---------|----------|----------|
| C | 4.12716 | -0.87954 | -0.75716 |
| C | 3.0282  | -1.3089  | 1.35682  |
| C | 5.36461 | -1.16848 | -0.17718 |
| H | 4.07647 | -0.59646 | -1.80284 |
| C | 4.26706 | -1.5999  | 1.93274  |
| H | 2.12563 | -1.38207 | 1.95632  |
| C | 5.43679 | -1.53065 | 1.17024  |
| H | 6.26602 | -1.11178 | -0.77578 |
| H | 4.31759 | -1.88202 | 2.97797  |
| H | 6.39529 | -1.75752 | 1.62203  |
| C | 2.01453 | 1.87535  | -0.13611 |
| C | 2.64834 | 2.3414   | 1.0223   |
| C | 2.29629 | 2.48993  | -1.36389 |
| C | 3.5567  | 3.40143  | 0.95535  |
| H | 2.43571 | 1.87229  | 1.97642  |
| C | 3.20554 | 3.5471   | -1.43223 |
| H | 1.80452 | 2.15428  | -2.27007 |
| C | 3.83822 | 4.00566  | -0.27234 |
| H | 4.03975 | 3.75404  | 1.85908  |
| H | 3.41665 | 4.01412  | -2.38707 |
| H | 4.54124 | 4.82852  | -0.32594 |
| C | 0.72819 | -2.98704 | -1.31416 |
| C | 1.89075 | -3.84752 | -0.80747 |
| C | 0.81671 | -2.66067 | -2.8128  |
| H | 2.85261 | -3.37822 | -1.0207  |
| H | 1.8113  | -4.02125 | 0.27003  |

---

|    |          |          |          |
|----|----------|----------|----------|
| H  | 1.78662  | -2.22471 | -3.07139 |
| H  | 0.7027   | -3.59001 | -3.37941 |
| H  | -0.21653 | -3.50522 | -1.11935 |
| Cl | -0.32617 | -1.9257  | 2.50613  |
| H  | 0.4195   | -1.90534 | 0.52342  |
| H  | -0.35098 | -1.26416 | -0.83323 |
| H  | 1.84801  | -4.81497 | -1.31848 |
| H  | 0.01347  | -1.97369 | -3.09524 |
| H  | -1.06811 | 1.23509  | -0.24    |

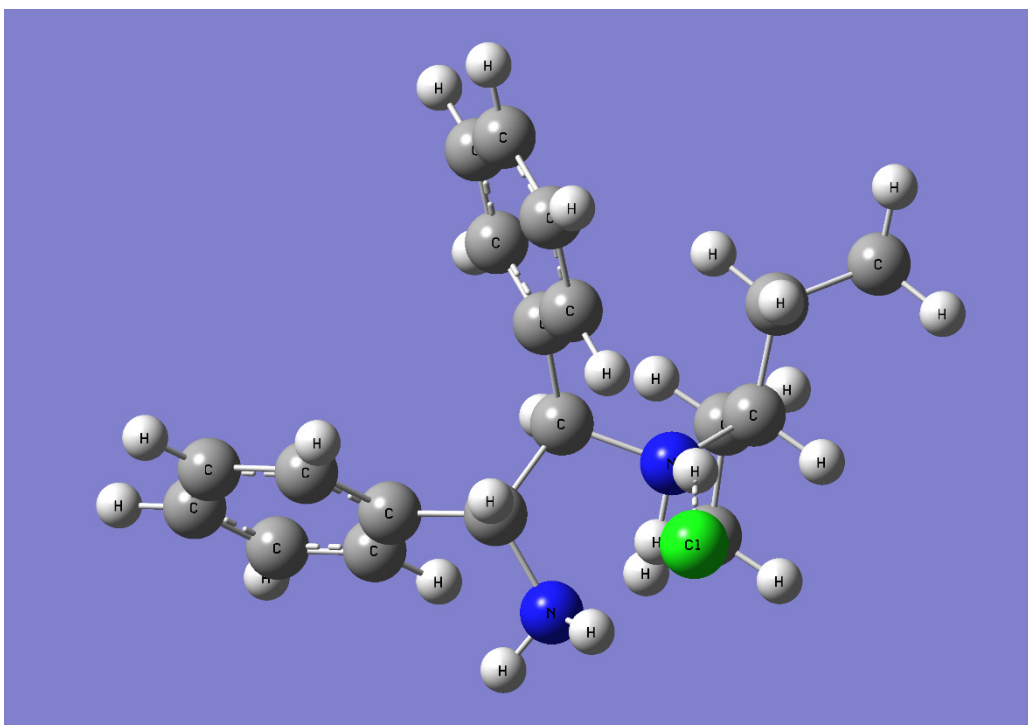**1b cat.-gas(3)**

Temperature = 298.15 Kelvin

Pressure = 1 atm

Frequencies scaled by = 1

Electronic Energy (EE) = -1303.1972 Hartree

Zero-point Energy Correction = 0.433132 Hartree

Thermal Correction to Energy = 0.455341 Hartree

Thermal Correction to Enthalpy = 0.456285 Hartree

Thermal Correction to Free Energy = 0.379938 Hartree

EE + Zero-point Energy = -1302.7641 Hartree

EE + Thermal Energy Correction = -1302.7419 Hartree

EE + Thermal Enthalpy Correction = -1302.7409 Hartree

EE + Thermal Free Energy Correction = -1302.8173 Hartree

E (Thermal) = 285.731 kcal/mol

Heat Capacity (Cv) = 84.367 cal/mol-kelvin

Entropy (S) = 160.685 cal/mol-kelvin

Symbolic Z-matrix:

Charge = 0 Multiplicity = 1

|   |          |          |          |
|---|----------|----------|----------|
| C | -0.85086 | 1.03343  | 0.02132  |
| C | -1.53034 | -0.28093 | 0.54253  |
| N | -0.5443  | -1.42629 | 0.29236  |
| N | 0.41073  | 1.24449  | 0.75526  |
| H | 0.20834  | 1.46725  | 1.70889  |
| H | -0.61627 | 0.87978  | -1.03479 |
| H | -1.65453 | -0.19807 | 1.62598  |
| C | -2.88659 | -0.50285 | -0.1045  |
| C | -4.04035 | -0.4246  | 0.68555  |
| C | -3.01155 | -0.73356 | -1.48366 |
| C | -5.3047  | -0.58644 | 0.11577  |
| H | -3.95166 | -0.22335 | 1.74815  |
| C | -4.27733 | -0.89718 | -2.04851 |
| H | -2.12347 | -0.80714 | -2.10701 |
| C | -5.425   | -0.82582 | -1.254   |
| H | -6.18919 | -0.52229 | 0.73866  |
| H | -4.36371 | -1.08331 | -3.1127  |
| H | -6.40473 | -0.95394 | -1.69956 |
| C | -1.79461 | 2.22546  | 0.18364  |
| C | -2.5125  | 2.71034  | -0.91535 |
| C | -1.95183 | 2.84764  | 1.42824  |

|    |          |          |          |
|----|----------|----------|----------|
| C  | -3.3819  | 3.79322  | -0.77025 |
| H  | -2.39789 | 2.23295  | -1.88154 |
| C  | -2.8227  | 3.92758  | 1.57579  |
| H  | -1.37898 | 2.50199  | 2.28162  |
| C  | -3.54103 | 4.40289  | 0.47562  |
| H  | -3.93155 | 4.1599   | -1.62927 |
| H  | -2.93471 | 4.40219  | 2.54389  |
| H  | -4.21412 | 5.24479  | 0.5882   |
| C  | -0.90412 | -2.86362 | 0.73429  |
| C  | -1.74059 | -3.57809 | -0.35137 |
| C  | -1.5459  | -2.89072 | 2.13456  |
| C  | -1.67713 | -5.11341 | -0.19189 |
| C  | -0.56771 | -2.53774 | 3.27961  |
| H  | -2.24633 | -5.59524 | -0.9934  |
| H  | -0.64073 | -5.46534 | -0.25299 |
| H  | -2.09912 | -5.44137 | 0.76422  |
| H  | 0.17477  | -3.33621 | 3.39336  |
| H  | -0.01428 | -1.61445 | 3.08627  |
| H  | -1.10706 | -2.44045 | 4.228    |
| H  | -2.77658 | -3.23224 | -0.30805 |
| H  | -1.33643 | -3.30471 | -1.33332 |
| H  | -2.42108 | -2.2329  | 2.13924  |
| H  | -1.92417 | -3.90647 | 2.29438  |
| H  | 0.078    | -3.3514  | 0.78295  |
| Cl | 0.28769  | -1.18537 | -2.62995 |
| H  | -0.31418 | -1.43892 | -0.75926 |

---

|   |         |          |         |
|---|---------|----------|---------|
| H | 0.36911 | -1.16123 | 0.76779 |
| H | 0.91749 | 1.9984   | 0.33715 |



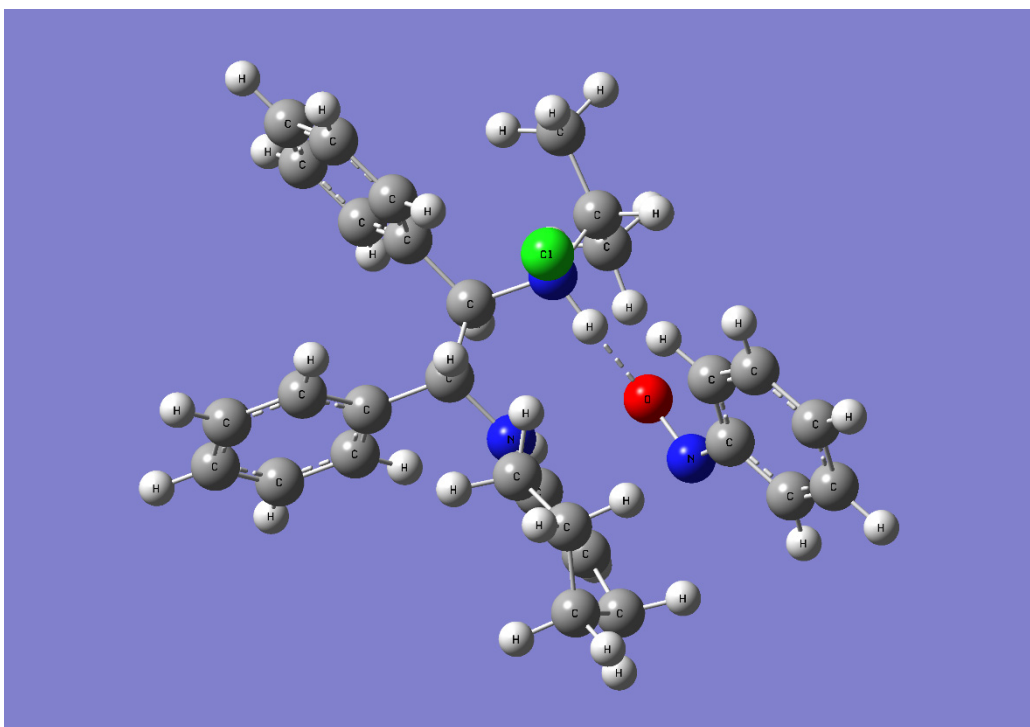**TS of 1a cat.-Gas**

Temperature = 298.15 Kelvin

Pressure = 1 atm

Frequencies scaled by = 1

Electronic Energy (EE) = -1816.7336 Hartree

Zero-point Energy Correction = 0.602506 Hartree

Thermal Correction to Energy = 0.635968 Hartree

Thermal Correction to Enthalpy = 0.636912 Hartree

Thermal Correction to Free Energy = 0.532796 Hartree

EE + Zero-point Energy = -1816.1311 Hartree

EE + Thermal Energy Correction = -1816.0976 Hartree

EE + Thermal Enthalpy Correction = -1816.0967 Hartree

EE + Thermal Free Energy Correction = -1816.2008 Hartree

E (Thermal) = 399.076 kcal/mol

Heat Capacity (Cv) = 126.268 cal/mol-kelvin

Entropy (S) = 219.131 cal/mol-kelvin

Symbolic Z-matrix:

Charge = 0 Multiplicity = 1

|   |          |          |          |
|---|----------|----------|----------|
| C | -1.68632 | 0.99979  | -0.13589 |
| C | -1.73002 | -0.44464 | 0.46951  |
| N | -0.27694 | -0.90569 | 0.52539  |
| N | -0.70165 | 1.80172  | 0.63573  |
| H | -1.15017 | 2.43208  | 1.30008  |
| H | -1.3486  | 0.93159  | -1.17344 |
| H | -2.05968 | -0.35338 | 1.50588  |
| C | -2.67072 | -1.36982 | -0.27644 |
| C | -3.8657  | -1.7538  | 0.34975  |
| C | -2.42156 | -1.79157 | -1.5911  |
| C | -4.7984  | -2.54714 | -0.31905 |
| H | -4.07195 | -1.42051 | 1.36147  |
| C | -3.35529 | -2.59043 | -2.25448 |
| H | -1.48253 | -1.54739 | -2.0795  |
| C | -4.54405 | -2.96768 | -1.62598 |
| H | -5.71787 | -2.83411 | 0.17792  |
| H | -3.14423 | -2.92226 | -3.26435 |
| H | -5.26438 | -3.58694 | -2.1481  |
| C | -3.06484 | 1.64286  | -0.0865  |
| C | -3.73263 | 1.98699  | -1.26685 |
| C | -3.67686 | 1.92241  | 1.14548  |

---

|    |          |          |          |
|----|----------|----------|----------|
| C  | -4.9849  | 2.60309  | -1.22005 |
| H  | -3.27239 | 1.76658  | -2.22309 |
| C  | -4.92655 | 2.54104  | 1.19352  |
| H  | -3.18147 | 1.65335  | 2.07382  |
| C  | -5.58396 | 2.88361  | 0.0092   |
| H  | -5.49058 | 2.86288  | -2.14264 |
| H  | -5.38762 | 2.7523   | 2.15153  |
| H  | -6.55526 | 3.36269  | 0.04552  |
| C  | 0.10009  | -2.08181 | 1.44383  |
| C  | -0.36594 | -3.41472 | 0.82703  |
| C  | -0.38156 | -1.83646 | 2.88545  |
| H  | -1.42922 | -3.49595 | 0.91495  |
| H  | -0.09013 | -3.44527 | -0.20636 |
| H  | -1.45038 | -1.87636 | 2.91606  |
| H  | 0.02206  | -2.58967 | 3.5294   |
| H  | 1.19465  | -2.04134 | 1.4208   |
| Cl | 0.95882  | -1.51997 | -2.20269 |
| H  | 0.10589  | -1.13835 | -0.45946 |
| C  | 0.46965  | 2.3728   | 0.04513  |
| C  | 1.0147   | 3.52966  | 0.87406  |
| C  | 1.07448  | 1.92348  | -1.06482 |
| C  | 2.48682  | 3.83419  | 0.53093  |
| C  | 2.32948  | 2.55692  | -1.63692 |
| C  | 2.65229  | 3.92552  | -0.99955 |
| H  | 2.79344  | 4.76853  | 1.01522  |
| H  | 2.21456  | 2.66603  | -2.72342 |

---

|   |          |          |          |
|---|----------|----------|----------|
| H | 1.9651   | 4.68718  | -1.39093 |
| H | 3.17681  | 1.87423  | -1.48067 |
| H | 3.67344  | 4.22789  | -1.25962 |
| H | 3.11502  | 3.02347  | 0.91955  |
| H | 0.26367  | -0.0755  | 0.84595  |
| O | 2.30587  | 0.08852  | 1.16412  |
| N | 3.53347  | 0.42962  | 1.35714  |
| H | 0.39552  | 4.42396  | 0.70614  |
| C | 4.44319  | -0.15422 | 0.41658  |
| C | 4.04347  | -0.89597 | -0.70652 |
| C | 5.80185  | 0.08339  | 0.67396  |
| C | 5.01481  | -1.4025  | -1.56169 |
| H | 2.99037  | -1.04424 | -0.92461 |
| C | 6.76908  | -0.43755 | -0.17834 |
| H | 6.06638  | 0.67166  | 1.54388  |
| C | 6.37357  | -1.18122 | -1.29732 |
| H | 4.70706  | -1.96134 | -2.43691 |
| H | 7.8202   | -0.26474 | 0.01762  |
| H | 7.12486  | -1.58121 | -1.96873 |
| H | 0.9321   | 3.26098  | 1.93618  |
| H | 0.73297  | 1.0356   | -1.58985 |
| H | 0.09792  | -4.22853 | 1.34419  |
| H | -0.05109 | -0.87285 | 3.21278  |

**TS of 1a cat.-Water**

Temperature = 298.15 Kelvin

Pressure = 1 atm

Frequencies scaled by = 1

Electronic Energy (EE) = -1816.7688 Hartree

Zero-point Energy Correction = 0.603687 Hartree

Thermal Correction to Energy = 0.636367 Hartree

Thermal Correction to Enthalpy = 0.637311 Hartree

Thermal Correction to Free Energy = 0.537745 Hartree

EE + Zero-point Energy = -1816.1651 Hartree

EE + Thermal Energy Correction = -1816.1324 Hartree

EE + Thermal Enthalpy Correction = -1816.1315 Hartree

EE + Thermal Free Energy Correction = -1816.2311 Hartree

E (Thermal) = 399.326 kcal/mol

Heat Capacity (Cv) = 125.929 cal/mol-kelvin

Entropy (S) = 209.554 cal/mol-kelvin

Symbolic Z-matrix:

Charge = 0 Multiplicity = 1

|   |          |          |          |
|---|----------|----------|----------|
| C | 1.01914  | 0.71901  | -0.04951 |
| C | 1.6276   | -0.59086 | -0.64984 |
| N | 0.56383  | -1.6828  | -0.4991  |
| N | -0.24104 | 1.02342  | -0.75802 |
| H | -0.20661 | 0.99881  | -1.77584 |
| H | 0.78038  | 0.52363  | 0.99711  |
| H | 1.77481  | -0.44802 | -1.72226 |
| C | 2.9507   | -0.94987 | 0.00208  |

|   |         |          |          |
|---|---------|----------|----------|
| C | 4.12573 | -0.88073 | -0.75883 |
| C | 3.02853 | -1.30951 | 1.35617  |
| C | 5.36352 | -1.17079 | -0.1802  |
| H | 4.07419 | -0.59738 | -1.8044  |
| C | 4.26774 | -1.60162 | 1.93073  |
| H | 2.12647 | -1.38221 | 1.95651  |
| C | 5.43674 | -1.53322 | 1.16707  |
| H | 6.26438 | -1.11469 | -0.77969 |
| H | 4.31903 | -1.88403 | 2.97584  |
| H | 6.39552 | -1.76096 | 1.61785  |
| C | 2.01515 | 1.8754   | -0.13605 |
| C | 2.65308 | 2.3389   | 1.02107  |
| C | 2.29397 | 2.49143  | -1.36375 |
| C | 3.56259 | 3.39784  | 0.95288  |
| H | 2.44281 | 1.86858  | 1.97511  |
| C | 3.20431 | 3.54755  | -1.43335 |
| H | 1.79886 | 2.15776  | -2.26887 |
| C | 3.84113 | 4.00354  | -0.27474 |
| H | 4.04887 | 3.74846  | 1.85564  |
| H | 3.41305 | 4.01578  | -2.38813 |
| H | 4.54504 | 4.82559  | -0.32926 |
| C | 0.72667 | -2.98705 | -1.31115 |
| C | 1.8884  | -3.84779 | -0.803   |
| C | 0.81608 | -2.66233 | -2.81012 |
| H | 2.85071 | -3.3795  | -1.01643 |
| H | 1.80841 | -4.01992 | 0.2747   |

---

|    |          |          |          |
|----|----------|----------|----------|
| H  | 1.78637  | -2.22712 | -3.06866 |
| H  | 0.70193  | -3.59217 | -3.37589 |
| H  | -0.21845 | -3.50451 | -1.11632 |
| Cl | -0.32578 | -1.9188  | 2.50664  |
| H  | 0.41785  | -1.90325 | 0.52543  |
| C  | -1.3483  | 1.6301   | -0.20362 |
| C  | -2.33449 | 2.11047  | -1.01967 |
| C  | -1.45389 | 1.6577   | 1.31201  |
| C  | -3.5925  | 2.76039  | -0.49996 |
| C  | -2.8737  | 2.02993  | 1.79671  |
| H  | -1.18147 | 0.6726   | 1.71353  |
| C  | -3.44904 | 3.19905  | 0.97446  |
| H  | -3.8533  | 3.61806  | -1.13216 |
| H  | -2.82909 | 2.28718  | 2.86061  |
| H  | -2.77481 | 4.06245  | 1.03992  |
| H  | -3.52826 | 1.15779  | 1.68683  |
| H  | -4.42579 | 3.49985  | 1.36967  |
| H  | -4.42538 | 2.04146  | -0.57074 |
| H  | -0.35218 | -1.26355 | -0.83244 |
| O  | -1.59135 | -0.79873 | -1.84734 |
| N  | -2.79476 | -0.25299 | -1.87166 |
| H  | -0.72824 | 2.38702  | 1.70029  |
| H  | -2.16303 | 2.13915  | -2.08888 |
| C  | -3.67207 | -0.7058  | -0.82484 |
| C  | -3.29033 | -1.45607 | 0.29723  |
| C  | -5.02112 | -0.35828 | -1.00554 |

---

|   |          |          |          |
|---|----------|----------|----------|
| C | -4.25103 | -1.84964 | 1.22327  |
| H | -2.25219 | -1.70281 | 0.46675  |
| C | -5.98311 | -0.76416 | -0.08124 |
| H | -5.29438 | 0.2041   | -1.88978 |
| C | -5.59929 | -1.50996 | 1.03706  |
| H | -3.94931 | -2.41608 | 2.09636  |
| H | -7.02338 | -0.50244 | -0.23183 |
| H | -6.34161 | -1.82403 | 1.76108  |
| H | 1.84508  | -4.81592 | -1.31271 |
| H | 0.01328  | -1.97528 | -3.09369 |



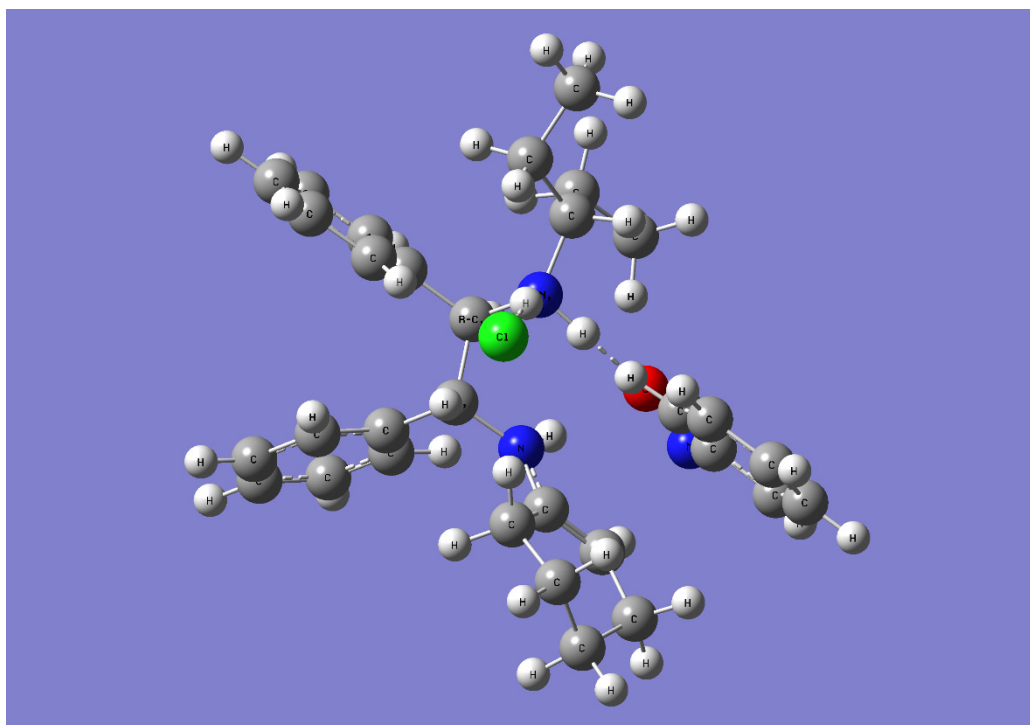

### TS of 1b cat.-Gas

Temperature = 298.15 Kelvin

Pressure = 1 atm

Frequencies scaled by = 1

Electronic Energy (EE) = -1894.9424 Hartree

Zero-point Energy Correction = 0.661461 Hartree

Thermal Correction to Energy = 0.696676 Hartree

Thermal Correction to Enthalpy = 0.697621 Hartree

Thermal Correction to Free Energy = 0.592772 Hartree

EE + Zero-point Energy = -1894.2809 Hartree

EE + Thermal Energy Correction = -1894.2457 Hartree

EE + Thermal Enthalpy Correction = -1894.2447 Hartree

EE + Thermal Free Energy Correction = -1894.3496 Hartree

E (Thermal) = 437.171 kcal/mol

Heat Capacity (Cv) = 135.388 cal/mol-kelvin

Entropy (S) = 220.672 cal/mol-kelvin

Symbolic Z-matrix:

Charge = 0 Multiplicity = 1

|   |         |          |          |
|---|---------|----------|----------|
| C | 1.71111 | 0.82245  | -0.15845 |
| C | 1.692   | -0.74115 | -0.34045 |
| N | 0.21384 | -1.13099 | -0.40158 |
| N | 0.69183 | 1.41569  | -1.08208 |
| H | 1.03291 | 1.48442  | -2.04737 |
| H | 1.37395 | 1.03915  | 0.85659  |
| H | 2.09878 | -0.98146 | -1.3267  |
| C | 2.51099 | -1.43188 | 0.73345  |
| C | 3.74182 | -1.99729 | 0.3706   |
| C | 2.11067 | -1.46586 | 2.07845  |
| C | 4.56222 | -2.59305 | 1.3294   |
| H | 4.0642  | -1.96132 | -0.66477 |
| C | 2.93286 | -2.06946 | 3.03236  |
| H | 1.14964 | -1.05841 | 2.3798   |
| C | 4.15738 | -2.63149 | 2.66451  |
| H | 5.51162 | -3.02429 | 1.03397  |
| H | 2.60802 | -2.10158 | 4.06577  |
| H | 4.78991 | -3.09718 | 3.41151  |
| C | 3.11786 | 1.36219  | -0.36712 |
| C | 3.81622 | 1.94437  | 0.69663  |
| C | 3.73266 | 1.29782  | -1.62629 |

---

|    |          |          |          |
|----|----------|----------|----------|
| C  | 5.1021   | 2.45501  | 0.50789  |
| H  | 3.35382  | 1.99001  | 1.6763   |
| C  | 5.01652  | 1.80821  | -1.81767 |
| H  | 3.21305  | 0.8464   | -2.46683 |
| C  | 5.70474  | 2.38958  | -0.74938 |
| H  | 5.63095  | 2.90206  | 1.34144  |
| H  | 5.47924  | 1.75335  | -2.79631 |
| H  | 6.70194  | 2.78696  | -0.8973  |
| C  | -0.14804 | -2.4674  | -1.07146 |
| C  | 0.2655   | -3.61832 | -0.13234 |
| C  | 0.43743  | -2.50852 | -2.50592 |
| C  | -0.32286 | -4.98632 | -0.5425  |
| C  | -0.43053 | -3.32003 | -3.50018 |
| H  | -0.12036 | -5.72258 | 0.24254  |
| H  | -1.40828 | -4.91884 | -0.67533 |
| H  | 0.11877  | -5.35596 | -1.47199 |
| H  | -0.39993 | -4.38874 | -3.27601 |
| H  | -1.46959 | -2.98509 | -3.44546 |
| H  | -0.06051 | -3.17665 | -4.52157 |
| H  | 1.35768  | -3.67697 | -0.08229 |
| H  | -0.0969  | -3.36782 | 0.87214  |
| H  | 0.49445  | -1.47776 | -2.88394 |
| H  | 1.45951  | -2.90712 | -2.47939 |
| H  | -1.23816 | -2.41928 | -1.13416 |
| Cl | -1.45336 | -0.66157 | 2.0949   |
| H  | -0.2857  | -1.0786  | 0.5549   |

|   |          |          |          |
|---|----------|----------|----------|
| C | 0.03605  | 2.63697  | -0.67538 |
| C | -0.2428  | 3.59112  | -1.5744  |
| C | -0.36669 | 2.73912  | 0.78726  |
| C | -1.012   | 4.85843  | -1.25506 |
| C | -1.4717  | 3.79646  | 0.99696  |
| H | -0.70702 | 1.76705  | 1.16625  |
| C | -1.1041  | 5.10525  | 0.26827  |
| H | -0.52518 | 5.71417  | -1.74172 |
| H | -1.60046 | 3.97393  | 2.07021  |
| H | -0.13192 | 5.4588   | 0.63506  |
| H | -2.41955 | 3.40983  | 0.61192  |
| H | -1.84719 | 5.88377  | 0.4768   |
| H | -2.0276  | 4.79114  | -1.67545 |
| H | -0.18486 | -0.30761 | -0.93307 |
| O | -3.53435 | -1.65673 | -1.63336 |
| N | -4.74945 | -1.25477 | -1.62656 |
| H | 0.51365  | 3.03023  | 1.38049  |
| H | 0.06488  | 3.45863  | -2.61076 |
| C | -5.12347 | -0.58052 | -0.41911 |
| C | -4.26248 | -0.36476 | 0.66749  |
| C | -6.44771 | -0.12114 | -0.38329 |
| C | -4.72952 | 0.3148   | 1.78242  |
| H | -3.2405  | -0.71871 | 0.64641  |
| C | -6.91345 | 0.55644  | 0.73598  |
| H | -7.08119 | -0.30756 | -1.24151 |
| C | -6.05287 | 0.77513  | 1.81802  |

---

|   |          |         |         |
|---|----------|---------|---------|
| H | -4.05329 | 0.47827 | 2.60796 |
| H | -7.93508 | 0.91422 | 0.77134 |
| H | -6.41483 | 1.30515 | 2.6915  |

**TS of 1b cat.-Water**

Temperature = 298.15 Kelvin

Pressure = 1 atm

Frequencies scaled by = 1

Electronic Energy (EE) = -1894.9692 Hartree

Zero-point Energy Correction = 0.661552 Hartree

Thermal Correction to Energy = 0.696912 Hartree

Thermal Correction to Enthalpy = 0.697856 Hartree

Thermal Correction to Free Energy = 0.592423 Hartree

EE + Zero-point Energy = -1894.3077 Hartree

EE + Thermal Energy Correction = -1894.2723 Hartree

EE + Thermal Enthalpy Correction = -1894.2714 Hartree

EE + Thermal Free Energy Correction = -1894.3768 Hartree

E (Thermal) = 437.319 kcal/mol

Heat Capacity (Cv) = 135.57 cal/mol-kelvin

Entropy (S) = 221.902 cal/mol-kelvin

Symbolic Z-matrix:

Charge = 0 Multiplicity = 1

|   |          |          |          |
|---|----------|----------|----------|
| C | -0.85086 | 1.03343  | 0.02132  |
| C | -1.53034 | -0.28093 | 0.54253  |
| N | -0.5443  | -1.42629 | 0.29236  |
| N | 0.41073  | 1.24449  | 0.75526  |
| H | 0.4194   | 1.01839  | 1.7483   |
| H | -0.61627 | 0.87978  | -1.03479 |
| H | -1.65453 | -0.19807 | 1.62598  |
| C | -2.88659 | -0.50285 | -0.1045  |

---

|   |          |          |          |
|---|----------|----------|----------|
| C | -4.04035 | -0.4246  | 0.68555  |
| C | -3.01155 | -0.73356 | -1.48366 |
| C | -5.3047  | -0.58644 | 0.11577  |
| H | -3.95166 | -0.22335 | 1.74815  |
| C | -4.27733 | -0.89718 | -2.04851 |
| H | -2.12347 | -0.80714 | -2.10701 |
| C | -5.425   | -0.82582 | -1.254   |
| H | -6.18919 | -0.52229 | 0.73866  |
| H | -4.36371 | -1.08331 | -3.1127  |
| H | -6.40473 | -0.95394 | -1.69956 |
| C | -1.79461 | 2.22546  | 0.18364  |
| C | -2.5125  | 2.71034  | -0.91535 |
| C | -1.95183 | 2.84764  | 1.42824  |
| C | -3.3819  | 3.79322  | -0.77025 |
| H | -2.39789 | 2.23295  | -1.88154 |
| C | -2.8227  | 3.92758  | 1.57579  |
| H | -1.37898 | 2.50199  | 2.28162  |
| C | -3.54103 | 4.40289  | 0.47562  |
| H | -3.93155 | 4.1599   | -1.62927 |
| H | -2.93471 | 4.40219  | 2.54389  |
| H | -4.21412 | 5.24479  | 0.5882   |
| C | -0.90412 | -2.86362 | 0.73429  |
| C | -1.74059 | -3.57809 | -0.35137 |
| C | -1.5459  | -2.89072 | 2.13456  |
| C | -1.67713 | -5.11341 | -0.19189 |
| C | -0.56771 | -2.53774 | 3.27961  |

---

|    |          |          |          |
|----|----------|----------|----------|
| H  | -2.24633 | -5.59524 | -0.9934  |
| H  | -0.64073 | -5.46534 | -0.25299 |
| H  | -2.09912 | -5.44137 | 0.76422  |
| H  | 0.17477  | -3.33621 | 3.39336  |
| H  | -0.01428 | -1.61445 | 3.08627  |
| H  | -1.10706 | -2.44045 | 4.228    |
| H  | -2.77658 | -3.23224 | -0.30805 |
| H  | -1.33643 | -3.30471 | -1.33332 |
| H  | -2.42108 | -2.2329  | 2.13924  |
| H  | -1.92417 | -3.90647 | 2.29438  |
| H  | 0.078    | -3.3514  | 0.78295  |
| Cl | 0.28769  | -1.18537 | -2.62995 |
| H  | -0.31418 | -1.43892 | -0.75926 |
| C  | 1.56653  | 1.79163  | 0.25535  |
| C  | 2.5907   | 2.08578  | 1.12034  |
| C  | 1.68468  | 1.9704   | -1.24789 |
| C  | 3.91417  | 2.64866  | 0.66591  |
| C  | 3.13572  | 2.26146  | -1.69464 |
| H  | 1.32906  | 1.06468  | -1.75868 |
| C  | 3.82232  | 3.26477  | -0.74835 |
| H  | 4.26521  | 3.3964   | 1.38787  |
| H  | 3.11864  | 2.6426   | -2.72141 |
| H  | 3.24004  | 4.19421  | -0.70823 |
| H  | 3.70079  | 1.32263  | -1.69645 |
| H  | 4.82669  | 3.50857  | -1.11326 |
| H  | 4.66202  | 1.8386   | 0.64692  |



---

|   |         |          |          |
|---|---------|----------|----------|
| H | 0.36911 | -1.16123 | 0.76779  |
| O | 1.55952 | -0.69999 | 1.78166  |
| N | 2.81945 | -0.2743  | 1.79878  |
| H | 1.02934 | 2.80197  | -1.54704 |
| H | 2.40279 | 2.0549   | 2.18589  |
| C | 3.62768 | -0.77298 | 0.71642  |
| C | 3.15853 | -1.33019 | -0.48117 |
| C | 5.01049 | -0.65004 | 0.93158  |
| C | 4.06407 | -1.7594  | -1.44609 |
| H | 2.10384 | -1.38203 | -0.70853 |
| C | 5.9154  | -1.10023 | -0.02808 |
| H | 5.34593 | -0.22516 | 1.86959  |
| C | 5.44326 | -1.65501 | -1.22086 |
| H | 3.68256 | -2.15559 | -2.37947 |
| H | 6.98081 | -1.01634 | 0.15079  |
| H | 6.14279 | -1.99509 | -1.9755  |

**Figure 5.**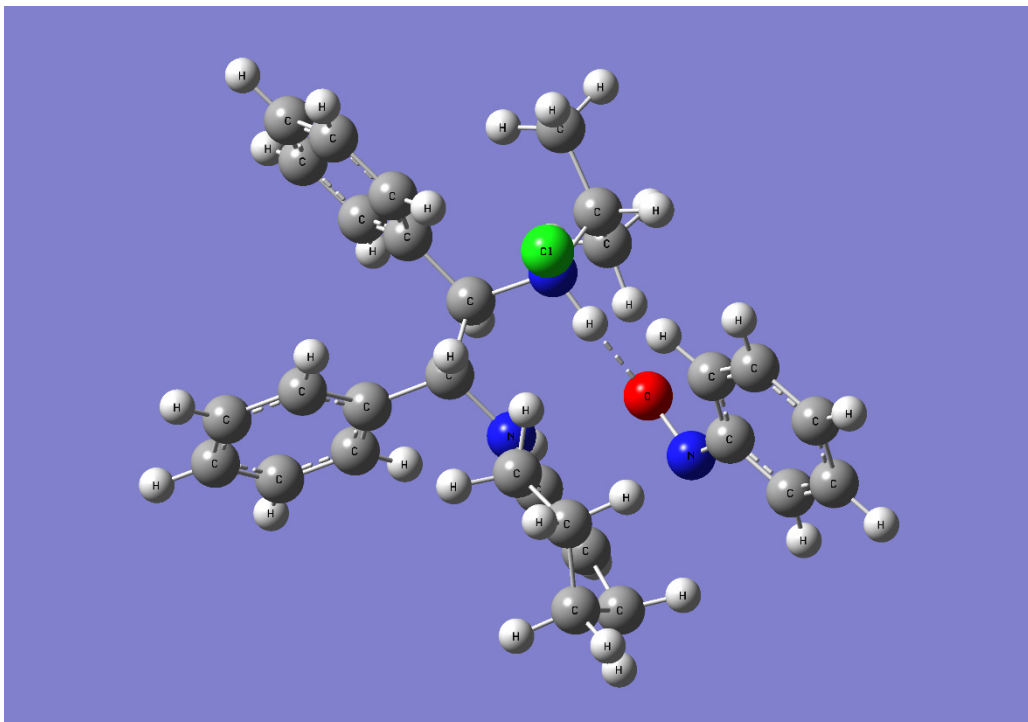**TS of 1a cat.-Heptane**

Temperature = 298.15 Kelvin

Pressure = 1 atm

Frequencies scaled by = 1

Electronic Energy (EE) = -1816.7499 Hartree

Zero-point Energy Correction = 0.603464 Hartree

Thermal Correction to Energy = 0.636088 Hartree

Thermal Correction to Enthalpy = 0.637032 Hartree

Thermal Correction to Free Energy = 0.537404 Hartree

EE + Zero-point Energy = -1816.1464 Hartree

EE + Thermal Energy Correction = -1816.1138 Hartree

EE + Thermal Enthalpy Correction = -1816.1129 Hartree

EE + Thermal Free Energy Correction = -1816.2125 Hartree

E (Thermal) = 399.151 kcal/mol

Heat Capacity (Cv) = 125.83 cal/mol-kelvin

Entropy (S) = 209.685 cal/mol-kelvin

Symbolic Z-matrix:

Charge = 0 Multiplicity = 1

|   |          |          |          |
|---|----------|----------|----------|
| C | 0.96217  | 0.73486  | -0.04304 |
| C | 1.5532   | -0.5817  | -0.66155 |
| N | 0.47154  | -1.66349 | -0.55229 |
| N | -0.2511  | 1.12223  | -0.79019 |
| H | -0.21027 | 1.03493  | -1.80312 |
| H | 0.68618  | 0.51125  | 0.98956  |
| H | 1.72533  | -0.4094  | -1.72766 |
| C | 2.86476  | -0.98088 | -0.00771 |
| C | 4.04568  | -0.90289 | -0.75842 |
| C | 2.92762  | -1.39505 | 1.33146  |
| C | 5.27432  | -1.23908 | -0.18727 |
| H | 4.00596  | -0.57014 | -1.79035 |
| C | 4.15851  | -1.73343 | 1.89765  |
| H | 2.0192   | -1.47844 | 1.92184  |
| C | 5.33249  | -1.65747 | 1.14373  |
| H | 6.17996  | -1.17336 | -0.77882 |
| H | 4.19621  | -2.06063 | 2.93017  |
| H | 6.28435  | -1.92237 | 1.58928  |
| C | 2.00463  | 1.85419  | -0.07423 |
| C | 2.70426  | 2.19647  | 1.08854  |

|    |          |          |          |
|----|----------|----------|----------|
| C  | 2.2776   | 2.544    | -1.2624  |
| C  | 3.66775  | 3.20729  | 1.06308  |
| H  | 2.50209  | 1.66465  | 2.01119  |
| C  | 3.24151  | 3.55263  | -1.29002 |
| H  | 1.72831  | 2.30662  | -2.16691 |
| C  | 3.93985  | 3.88652  | -0.12627 |
| H  | 4.20267  | 3.46294  | 1.97022  |
| H  | 3.44283  | 4.08099  | -2.21481 |
| H  | 4.68587  | 4.67233  | -0.14646 |
| C  | 0.63961  | -2.96273 | -1.35856 |
| C  | 1.76584  | -3.84828 | -0.81282 |
| C  | 0.78206  | -2.64056 | -2.85452 |
| H  | 2.74464  | -3.40058 | -0.99465 |
| H  | 1.64606  | -4.01171 | 0.26221  |
| H  | 1.76781  | -2.21899 | -3.07728 |
| H  | 0.6747   | -3.56674 | -3.42796 |
| H  | -0.32101 | -3.46367 | -1.19516 |
| Cl | -0.4355  | -1.71805 | 2.37407  |
| H  | 0.29077  | -1.86485 | 0.4807   |
| C  | -1.36692 | 1.75602  | -0.28715 |
| C  | -2.33751 | 2.18544  | -1.15092 |
| C  | -1.49802 | 1.87594  | 1.22205  |
| C  | -3.61643 | 2.84356  | -0.69425 |
| C  | -2.92713 | 2.27313  | 1.65838  |
| H  | -1.23282 | 0.9213   | 1.69615  |
| C  | -3.50137 | 3.3782   | 0.75106  |

---

|   |          |          |          |
|---|----------|----------|----------|
| H | -3.87954 | 3.65719  | -1.38161 |
| H | -2.89944 | 2.60176  | 2.70297  |
| H | -2.83802 | 4.25232  | 0.76841  |
| H | -3.57386 | 1.39012  | 1.6009   |
| H | -4.48738 | 3.69281  | 1.11171  |
| H | -4.43575 | 2.10616  | -0.73674 |
| H | -0.42953 | -1.23256 | -0.91195 |
| O | -1.57455 | -0.63353 | -1.87404 |
| N | -2.82978 | -0.23505 | -1.833   |
| H | -0.77774 | 2.6307   | 1.57029  |
| H | -2.14271 | 2.16611  | -2.21579 |
| C | -3.56842 | -0.81234 | -0.74571 |
| C | -3.02159 | -1.42413 | 0.39397  |
| C | -4.96064 | -0.66482 | -0.85887 |
| C | -3.86598 | -1.88629 | 1.3998   |
| H | -1.95102 | -1.50804 | 0.53756  |
| C | -5.80296 | -1.14967 | 0.13987  |
| H | -5.35411 | -0.18074 | -1.7441  |
| C | -5.25639 | -1.75853 | 1.27401  |
| H | -3.42992 | -2.35107 | 2.27585  |
| H | -6.87678 | -1.04654 | 0.04012  |
| H | -5.9069  | -2.12581 | 2.05902  |
| H | 1.7191   | -4.81833 | -1.31945 |
| H | -0.00085 | -1.94136 | -3.1631  |

**TS of 1a cat.-Cyclohexane**

Temperature = 298.15 Kelvin

Pressure = 1 atm

Frequencies scaled by = 1

Electronic Energy (EE) = -1816.766 Hartree

Zero-point Energy Correction = 0.603813 Hartree

Thermal Correction to Energy = 0.636422 Hartree

Thermal Correction to Enthalpy = 0.637366 Hartree

Thermal Correction to Free Energy = 0.538254 Hartree

EE + Zero-point Energy = -1816.1622 Hartree

EE + Thermal Energy Correction = -1816.1295 Hartree

EE + Thermal Enthalpy Correction = -1816.1286 Hartree

EE + Thermal Free Energy Correction = -1816.2277 Hartree

E (Thermal) = 399.361 kcal/mol

Heat Capacity (Cv) = 125.859 cal/mol-kelvin

Entropy (S) = 208.599 cal/mol-kelvin

Symbolic Z-matrix:

Charge = 0 Multiplicity = 1

|   |          |          |          |
|---|----------|----------|----------|
| C | 1.0193   | 0.7182   | -0.05066 |
| C | 1.62873  | -0.59129 | -0.65061 |
| N | 0.56513  | -1.6836  | -0.50061 |
| N | -0.2408  | 1.02191  | -0.75972 |
| H | -0.20533 | 0.99883  | -1.77758 |
| H | 0.78004  | 0.5227   | 0.99581  |
| H | 1.7767   | -0.44864 | -1.72292 |
| C | 2.95141  | -0.94957 | 0.00258  |

---

|   |         |          |          |
|---|---------|----------|----------|
| C | 4.12716 | -0.87954 | -0.75716 |
| C | 3.0282  | -1.3089  | 1.35682  |
| C | 5.36461 | -1.16848 | -0.17718 |
| H | 4.07647 | -0.59646 | -1.80284 |
| C | 4.26706 | -1.5999  | 1.93274  |
| H | 2.12563 | -1.38207 | 1.95632  |
| C | 5.43679 | -1.53065 | 1.17024  |
| H | 6.26602 | -1.11178 | -0.77578 |
| H | 4.31759 | -1.88202 | 2.97797  |
| H | 6.39529 | -1.75752 | 1.62203  |
| C | 2.01453 | 1.87535  | -0.13611 |
| C | 2.64834 | 2.3414   | 1.0223   |
| C | 2.29629 | 2.48993  | -1.36389 |
| C | 3.5567  | 3.40143  | 0.95535  |
| H | 2.43571 | 1.87229  | 1.97642  |
| C | 3.20554 | 3.5471   | -1.43223 |
| H | 1.80452 | 2.15428  | -2.27007 |
| C | 3.83822 | 4.00566  | -0.27234 |
| H | 4.03975 | 3.75404  | 1.85908  |
| H | 3.41665 | 4.01412  | -2.38707 |
| H | 4.54124 | 4.82852  | -0.32594 |
| C | 0.72819 | -2.98704 | -1.31416 |
| C | 1.89075 | -3.84752 | -0.80747 |
| C | 0.81671 | -2.66067 | -2.8128  |
| H | 2.85261 | -3.37822 | -1.0207  |
| H | 1.8113  | -4.02125 | 0.27003  |

---

|    |          |          |          |
|----|----------|----------|----------|
| H  | 1.78662  | -2.22471 | -3.07139 |
| H  | 0.7027   | -3.59001 | -3.37941 |
| H  | -0.21653 | -3.50522 | -1.11935 |
| Cl | -0.32617 | -1.9257  | 2.50613  |
| H  | 0.4195   | -1.90534 | 0.52342  |
| C  | -1.34786 | 1.6292   | -0.20539 |
| C  | -2.33372 | 2.11032  | -1.02126 |
| C  | -1.45348 | 1.65645  | 1.31028  |
| C  | -3.59098 | 2.76154  | -0.50137 |
| C  | -2.87274 | 2.0305   | 1.79524  |
| H  | -1.18233 | 0.67076  | 1.71126  |
| C  | -3.44674 | 3.20025  | 0.97294  |
| H  | -3.85104 | 3.61938  | -1.13364 |
| H  | -2.8276  | 2.28788  | 2.85909  |
| H  | -2.77142 | 4.0628   | 1.03821  |
| H  | -3.52854 | 1.15926  | 1.68556  |
| H  | -4.42304 | 3.50231  | 1.3683   |
| H  | -4.42465 | 2.0435   | -0.57187 |
| H  | -0.35098 | -1.26416 | -0.83323 |
| O  | -1.59288 | -0.80111 | -1.84696 |
| N  | -2.79578 | -0.25456 | -1.87144 |
| H  | -0.72684 | 2.38454  | 1.69895  |
| H  | -2.16244 | 2.1386   | -2.09053 |
| C  | -3.67306 | -0.70595 | -0.8239  |
| C  | -3.29144 | -1.45765 | 0.29725  |
| C  | -5.02168 | -0.35608 | -1.00302 |



---

|   |          |          |          |
|---|----------|----------|----------|
| C | -4.25174 | -1.84991 | 1.22425  |
| H | -2.25352 | -1.7067  | 0.46473  |
| C | -5.98334 | -0.76055 | -0.07772 |
| H | -5.29507 | 0.20706  | -1.88675 |
| C | -5.59959 | -1.50751 | 1.03984  |
| H | -3.95031 | -2.41781 | 2.09651  |
| H | -7.0233  | -0.4969  | -0.22702 |
| H | -6.34167 | -1.82059 | 1.76453  |
| H | 1.84801  | -4.81497 | -1.31848 |
| H | 0.01347  | -1.97369 | -3.09524 |

**TS of 1a cat.-CCl<sub>4</sub>**

Temperature = 298.15 Kelvin

Pressure = 1 atm

Frequencies scaled by = 1

Electronic Energy (EE) = -1816.7518 Hartree

Zero-point Energy Correction = 0.603494 Hartree

Thermal Correction to Energy = 0.636146 Hartree

Thermal Correction to Enthalpy = 0.63709 Hartree

Thermal Correction to Free Energy = 0.537178 Hartree

EE + Zero-point Energy = -1816.1483 Hartree

EE + Thermal Energy Correction = -1816.1157 Hartree

EE + Thermal Enthalpy Correction = -1816.1147 Hartree

EE + Thermal Free Energy Correction = -1816.2147 Hartree

E (Thermal) = 399.188 kcal/mol

Heat Capacity (Cv) = 125.819 cal/mol-kelvin

Entropy (S) = 210.283 cal/mol-kelvin

Symbolic Z-matrix:

Charge = 0 Multiplicity = 1

|   |          |          |          |
|---|----------|----------|----------|
| C | 1.00289  | 0.72657  | -0.03914 |
| C | 1.60065  | -0.5894  | -0.64163 |
| N | 0.53851  | -1.67635 | -0.46784 |
| N | -0.25202 | 1.04204  | -0.75002 |
| H | -0.24028 | 0.95718  | -1.76445 |
| H | 0.76278  | 0.52819  | 1.00745  |
| H | 1.73203  | -0.44792 | -1.71747 |
| C | 2.93413  | -0.95058 | -0.0124  |

|   |         |          |          |
|---|---------|----------|----------|
| C | 4.09516 | -0.89212 | -0.79447 |
| C | 3.03264 | -1.30999 | 1.34045  |
| C | 5.34044 | -1.1942  | -0.23976 |
| H | 4.0275  | -0.60236 | -1.83775 |
| C | 4.27951 | -1.61409 | 1.89029  |
| H | 2.1395  | -1.37328 | 1.95627  |
| C | 5.43437 | -1.55806 | 1.10524  |
| H | 6.23113 | -1.14438 | -0.85504 |
| H | 4.34568 | -1.89764 | 2.9342   |
| H | 6.39914 | -1.79572 | 1.5381   |
| C | 2.01089 | 1.87108  | -0.13526 |
| C | 2.70392 | 2.29484  | 1.00441  |
| C | 2.25226 | 2.51075  | -1.35806 |
| C | 3.63007 | 3.33732  | 0.92261  |
| H | 2.52497 | 1.80313  | 1.95383  |
| C | 3.17916 | 3.55049  | -1.44193 |
| H | 1.7093  | 2.20828  | -2.24709 |
| C | 3.87073 | 3.96652  | -0.30055 |
| H | 4.15987 | 3.65676  | 1.81235  |
| H | 3.35725 | 4.03886  | -2.39303 |
| H | 4.58766 | 4.77666  | -0.36456 |
| C | 0.70253 | -3.00694 | -1.22552 |
| C | 1.84178 | -3.86599 | -0.66503 |
| C | 0.82238 | -2.73896 | -2.7341  |
| H | 2.81495 | -3.41968 | -0.8759  |
| H | 1.73865 | -3.9937  | 0.41658  |

---

|    |          |          |          |
|----|----------|----------|----------|
| H  | 1.80203  | -2.32007 | -2.98611 |
| H  | 0.71337  | -3.68648 | -3.27105 |
| H  | -0.25289 | -3.5061  | -1.03059 |
| Cl | -0.30391 | -1.7141  | 2.49336  |
| H  | 0.37932  | -1.85118 | 0.57277  |
| C  | -1.36721 | 1.64085  | -0.20793 |
| C  | -2.36152 | 2.08265  | -1.03867 |
| C  | -1.47265 | 1.70798  | 1.30574  |
| C  | -3.63492 | 2.71582  | -0.53609 |
| C  | -2.89836 | 2.07014  | 1.78063  |
| H  | -1.18587 | 0.73989  | 1.73812  |
| C  | -3.49944 | 3.20133  | 0.92458  |
| H  | -3.91801 | 3.54817  | -1.1924  |
| H  | -2.85617 | 2.36004  | 2.83607  |
| H  | -2.8443  | 4.08104  | 0.96178  |
| H  | -3.53492 | 1.18167  | 1.70215  |
| H  | -4.48234 | 3.49286  | 1.31196  |
| H  | -4.44901 | 1.97357  | -0.58362 |
| H  | -0.37636 | -1.269   | -0.82484 |
| O  | -1.56078 | -0.78497 | -1.8586  |
| N  | -2.77869 | -0.26474 | -1.87169 |
| H  | -0.75801 | 2.46099  | 1.66943  |
| H  | -2.18645 | 2.09635  | -2.10734 |
| C  | -3.63931 | -0.73549 | -0.81921 |
| C  | -3.23714 | -1.4258  | 0.33375  |
| C  | -5.00052 | -0.45338 | -1.02339 |

---

|   |          |          |          |
|---|----------|----------|----------|
| C | -4.19032 | -1.82955 | 1.26332  |
| H | -2.19319 | -1.61067 | 0.54338  |
| C | -5.95407 | -0.87338 | -0.09766 |
| H | -5.28497 | 0.06958  | -1.92812 |
| C | -5.5499  | -1.56235 | 1.04931  |
| H | -3.86684 | -2.34015 | 2.1623   |
| H | -7.00348 | -0.66465 | -0.26791 |
| H | -6.28569 | -1.88392 | 1.77694  |
| H | 1.79326  | -4.85277 | -1.138   |
| H | 0.0297   | -2.05704 | -3.05722 |

**TS of 1a cat.-Benzen**

Temperature = 298.15 Kelvin

Pressure = 1 atm

Frequencies scaled by = 1

Electronic Energy (EE) = -1816.7521 Hartree

Zero-point Energy Correction = 0.603506 Hartree

Thermal Correction to Energy = 0.636155 Hartree

Thermal Correction to Enthalpy = 0.637099 Hartree

Thermal Correction to Free Energy = 0.537233 Hartree

EE + Zero-point Energy = -1816.1486 Hartree

EE + Thermal Energy Correction = -1816.1159 Hartree

EE + Thermal Enthalpy Correction = -1816.115 Hartree

EE + Thermal Free Energy Correction = -1816.2148 Hartree

E (Thermal) = 399.193 kcal/mol

Heat Capacity (Cv) = 125.816 cal/mol-kelvin

Entropy (S) = 210.186 cal/mol-kelvin

Symbolic Z-matrix:

Charge = 0 Multiplicity = 1

|   |          |          |          |
|---|----------|----------|----------|
| C | 1.00933  | 0.7233   | -0.04085 |
| C | 1.61165  | -0.59018 | -0.64259 |
| N | 0.55003  | -1.68009 | -0.47739 |
| N | -0.24814 | 1.03376  | -0.75036 |
| H | -0.22664 | 0.97399  | -1.76655 |
| H | 0.77042  | 0.52655  | 1.00593  |
| H | 1.74838  | -0.44768 | -1.71718 |
| C | 2.94199  | -0.94984 | -0.00579 |

|   |         |          |          |
|---|---------|----------|----------|
| C | 4.10796 | -0.88558 | -0.78036 |
| C | 3.03368 | -1.31107 | 1.34697  |
| C | 5.35096 | -1.18284 | -0.21767 |
| H | 4.04566 | -0.59718 | -1.82419 |
| C | 4.27821 | -1.61038 | 1.90517  |
| H | 2.13761 | -1.37983 | 1.9573   |
| C | 5.43804 | -1.54769 | 1.12774  |
| H | 6.2452  | -1.12909 | -0.82736 |
| H | 4.33935 | -1.89494 | 2.9491   |
| H | 6.401   | -1.78136 | 1.56664  |
| C | 2.01253 | 1.8724   | -0.13523 |
| C | 2.68666 | 2.3121   | 1.00997  |
| C | 2.26656 | 2.50167  | -1.36115 |
| C | 3.60678 | 3.36049  | 0.93107  |
| H | 2.49744 | 1.82936  | 1.96207  |
| C | 3.18733 | 3.54737  | -1.44186 |
| H | 1.74068 | 2.18615  | -2.25578 |
| C | 3.86004 | 3.97955  | -0.29494 |
| H | 4.12177 | 3.69234  | 1.82496  |
| H | 3.37579 | 4.02708  | -2.39531 |
| H | 4.57224 | 4.79396  | -0.35703 |
| C | 0.71362 | -2.99964 | -1.25835 |
| C | 1.86504 | -3.85827 | -0.72322 |
| C | 0.81613 | -2.70795 | -2.76369 |
| H | 2.83248 | -3.4011  | -0.93738 |
| H | 1.77465 | -4.00539 | 0.3571   |

---

|    |          |          |          |
|----|----------|----------|----------|
| H  | 1.79099  | -2.28204 | -3.02192 |
| H  | 0.70379  | -3.64833 | -3.31226 |
| H  | -0.23629 | -3.50772 | -1.06075 |
| Cl | -0.31092 | -1.79156 | 2.50146  |
| H  | 0.39739  | -1.87399 | 0.55702  |
| C  | -1.36024 | 1.63698  | -0.20463 |
| C  | -2.35108 | 2.09274  | -1.03071 |
| C  | -1.46584 | 1.69183  | 1.30974  |
| C  | -3.61929 | 2.73239  | -0.52315 |
| C  | -2.89    | 2.05665  | 1.78721  |
| H  | -1.18333 | 0.71859  | 1.73252  |
| C  | -3.482   | 3.20125  | 0.94269  |
| H  | -3.89381 | 3.57398  | -1.17119 |
| H  | -2.84776 | 2.33481  | 2.84582  |
| H  | -2.82047 | 4.07564  | 0.99048  |
| H  | -3.53226 | 1.17335  | 1.69694  |
| H  | -4.46313 | 3.49562  | 1.33221  |
| H  | -4.44023 | 1.99842  | -0.57977 |
| H  | -0.36617 | -1.26854 | -0.82327 |
| O  | -1.572   | -0.79211 | -1.84981 |
| N  | -2.78455 | -0.26281 | -1.86989 |
| H  | -0.74813 | 2.43782  | 1.68137  |
| H  | -2.17742 | 2.11007  | -2.09968 |
| C  | -3.65328 | -0.72524 | -0.82051 |
| C  | -3.26066 | -1.43516 | 0.32389  |
| C  | -5.01005 | -0.41998 | -1.02038 |



---

|   |          |          |          |
|---|----------|----------|----------|
| C | -4.21913 | -1.83451 | 1.24991  |
| H | -2.21875 | -1.64207 | 0.52253  |
| C | -5.96912 | -0.83411 | -0.09738 |
| H | -5.28845 | 0.11607  | -1.91931 |
| C | -5.57467 | -1.54212 | 1.04144  |
| H | -3.9054  | -2.36347 | 2.1418   |
| H | -7.01519 | -0.60681 | -0.26385 |
| H | -6.3146  | -1.8604  | 1.76622  |
| H | 1.81897  | -4.8372  | -1.21214 |
| H | 0.01773  | -2.02435 | -3.06805 |

**TS of 1a cat.-Toluene**

Temperature = 298.15 Kelvin

Pressure = 1 atm

Frequencies scaled by = 1

Electronic Energy (EE) = -1816.7526 Hartree

Zero-point Energy Correction = 0.603537 Hartree

Thermal Correction to Energy = 0.636176 Hartree

Thermal Correction to Enthalpy = 0.63712 Hartree

Thermal Correction to Free Energy = 0.537369 Hartree

EE + Zero-point Energy = -1816.1491 Hartree

EE + Thermal Energy Correction = -1816.1164 Hartree

EE + Thermal Enthalpy Correction = -1816.1155 Hartree

EE + Thermal Free Energy Correction = -1816.2152 Hartree

E (Thermal) = 399.206 kcal/mol

Heat Capacity (Cv) = 125.81 cal/mol-kelvin

Entropy (S) = 209.943 cal/mol-kelvin

Symbolic Z-matrix:

Charge = 0 Multiplicity = 1

|   |          |          |          |
|---|----------|----------|----------|
| C | 1.0193   | 0.7182   | -0.05066 |
| C | 1.62873  | -0.59129 | -0.65061 |
| N | 0.56513  | -1.6836  | -0.50061 |
| N | -0.2408  | 1.02191  | -0.75972 |
| H | -0.20533 | 0.99883  | -1.77758 |
| H | 0.78004  | 0.5227   | 0.99581  |
| H | 1.7767   | -0.44864 | -1.72292 |
| C | 2.95141  | -0.94957 | 0.00258  |

---

|   |         |          |          |
|---|---------|----------|----------|
| C | 4.12716 | -0.87954 | -0.75716 |
| C | 3.0282  | -1.3089  | 1.35682  |
| C | 5.36461 | -1.16848 | -0.17718 |
| H | 4.07647 | -0.59646 | -1.80284 |
| C | 4.26706 | -1.5999  | 1.93274  |
| H | 2.12563 | -1.38207 | 1.95632  |
| C | 5.43679 | -1.53065 | 1.17024  |
| H | 6.26602 | -1.11178 | -0.77578 |
| H | 4.31759 | -1.88202 | 2.97797  |
| H | 6.39529 | -1.75752 | 1.62203  |
| C | 2.01453 | 1.87535  | -0.13611 |
| C | 2.64834 | 2.3414   | 1.0223   |
| C | 2.29629 | 2.48993  | -1.36389 |
| C | 3.5567  | 3.40143  | 0.95535  |
| H | 2.43571 | 1.87229  | 1.97642  |
| C | 3.20554 | 3.5471   | -1.43223 |
| H | 1.80452 | 2.15428  | -2.27007 |
| C | 3.83822 | 4.00566  | -0.27234 |
| H | 4.03975 | 3.75404  | 1.85908  |
| H | 3.41665 | 4.01412  | -2.38707 |
| H | 4.54124 | 4.82852  | -0.32594 |
| C | 0.72819 | -2.98704 | -1.31416 |
| C | 1.89075 | -3.84752 | -0.80747 |
| C | 0.81671 | -2.66067 | -2.8128  |
| H | 2.85261 | -3.37822 | -1.0207  |
| H | 1.8113  | -4.02125 | 0.27003  |

---

|    |          |          |          |
|----|----------|----------|----------|
| H  | 1.78662  | -2.22471 | -3.07139 |
| H  | 0.7027   | -3.59001 | -3.37941 |
| H  | -0.21653 | -3.50522 | -1.11935 |
| Cl | -0.32617 | -1.9257  | 2.50613  |
| H  | 0.4195   | -1.90534 | 0.52342  |
| C  | -1.34786 | 1.6292   | -0.20539 |
| C  | -2.33372 | 2.11032  | -1.02126 |
| C  | -1.45348 | 1.65645  | 1.31028  |
| C  | -3.59098 | 2.76154  | -0.50137 |
| C  | -2.87274 | 2.0305   | 1.79524  |
| H  | -1.18233 | 0.67076  | 1.71126  |
| C  | -3.44674 | 3.20025  | 0.97294  |
| H  | -3.85104 | 3.61938  | -1.13364 |
| H  | -2.8276  | 2.28788  | 2.85909  |
| H  | -2.77142 | 4.0628   | 1.03821  |
| H  | -3.52854 | 1.15926  | 1.68556  |
| H  | -4.42304 | 3.50231  | 1.3683   |
| H  | -4.42465 | 2.0435   | -0.57187 |
| H  | -0.35098 | -1.26416 | -0.83323 |
| O  | -1.59288 | -0.80111 | -1.84696 |
| N  | -2.79578 | -0.25456 | -1.87144 |
| H  | -0.72684 | 2.38454  | 1.69895  |
| H  | -2.16244 | 2.1386   | -2.09053 |
| C  | -3.67306 | -0.70595 | -0.8239  |
| C  | -3.29144 | -1.45765 | 0.29725  |
| C  | -5.02168 | -0.35608 | -1.00302 |

---

|   |          |          |          |
|---|----------|----------|----------|
| C | -4.25174 | -1.84991 | 1.22425  |
| H | -2.25352 | -1.7067  | 0.46473  |
| C | -5.98334 | -0.76055 | -0.07772 |
| H | -5.29507 | 0.20706  | -1.88675 |
| C | -5.59959 | -1.50751 | 1.03984  |
| H | -3.95031 | -2.41781 | 2.09651  |
| H | -7.0233  | -0.4969  | -0.22702 |
| H | -6.34167 | -1.82059 | 1.76453  |
| H | 1.84801  | -4.81497 | -1.31848 |
| H | 0.01347  | -1.97369 | -3.09524 |

**TS of 1a cat.-Toluene**

Temperature = 298.15 Kelvin

Pressure = 1 atm

Frequencies scaled by = 1

Electronic Energy (EE) = -1816.7585 Hartree

Zero-point Energy Correction = 0.603768 Hartree

Thermal Correction to Energy = 0.636359 Hartree

Thermal Correction to Enthalpy = 0.637303 Hartree

Thermal Correction to Free Energy = 0.538111 Hartree

EE + Zero-point Energy = -1816.1548 Hartree

EE + Thermal Energy Correction = -1816.1222 Hartree

EE + Thermal Enthalpy Correction = -1816.1212 Hartree

EE + Thermal Free Energy Correction = -1816.2204 Hartree

E (Thermal) = 399.321 kcal/mol

Heat Capacity (Cv) = 125.793 cal/mol-kelvin

Entropy (S) = 208.766 cal/mol-kelvin

Symbolic Z-matrix:

Charge = 0 Multiplicity = 1

|   |          |          |          |
|---|----------|----------|----------|
| C | 1.01078  | 0.72351  | -0.04094 |
| C | 1.61298  | -0.58984 | -0.64283 |
| N | 0.55073  | -1.67957 | -0.47936 |
| N | -0.24715 | 1.03392  | -0.74975 |
| H | -0.2248  | 0.97783  | -1.76616 |
| H | 0.77235  | 0.52714  | 1.00595  |
| H | 1.75075  | -0.44699 | -1.71718 |
| C | 2.94249  | -0.95036 | -0.0048  |

|   |         |          |          |
|---|---------|----------|----------|
| C | 4.10927 | -0.88631 | -0.77822 |
| C | 3.03279 | -1.31187 | 1.34797  |
| C | 5.35166 | -1.18387 | -0.21428 |
| H | 4.048   | -0.5982  | -1.82216 |
| C | 4.2767  | -1.61149 | 1.90748  |
| H | 2.13619 | -1.38077 | 1.95742  |
| C | 5.43735 | -1.54884 | 1.13123  |
| H | 6.24648 | -1.13039 | -0.82312 |
| H | 4.33683 | -1.89621 | 2.95143  |
| H | 6.39981 | -1.78271 | 1.57108  |
| C | 2.01381 | 1.87283  | -0.13529 |
| C | 2.6864  | 2.31379  | 1.01038  |
| C | 2.26897 | 2.50122  | -1.36147 |
| C | 3.60616 | 3.36257  | 0.93174  |
| H | 2.49621 | 1.8319   | 1.96272  |
| C | 3.18936 | 3.54732  | -1.44188 |
| H | 1.74459 | 2.18473  | -2.2566  |
| C | 3.86056 | 3.98076  | -0.2945  |
| H | 4.11991 | 3.69541  | 1.82597  |
| H | 3.37877 | 4.02625  | -2.39551 |
| H | 4.57248 | 4.79543  | -0.35644 |
| C | 0.71376 | -2.99745 | -1.26385 |
| C | 1.86572 | -3.85703 | -0.73152 |
| C | 0.81523 | -2.70211 | -2.76853 |
| H | 2.83292 | -3.39924 | -0.94543 |
| H | 1.77618 | -4.00676 | 0.34852  |

---

|    |          |          |          |
|----|----------|----------|----------|
| H  | 1.78988  | -2.27573 | -3.02672 |
| H  | 0.70225  | -3.64126 | -3.31905 |
| H  | -0.23593 | -3.50608 | -1.06677 |
| Cl | -0.31319 | -1.80417 | 2.50203  |
| H  | 0.39864  | -1.87643 | 0.55405  |
| C  | -1.35869 | 1.63723  | -0.20271 |
| C  | -2.3492  | 2.09579  | -1.0275  |
| C  | -1.46411 | 1.68877  | 1.31183  |
| C  | -3.61659 | 2.73584  | -0.51837 |
| C  | -2.88807 | 2.05315  | 1.7902   |
| H  | -1.18191 | 0.71444  | 1.73222  |
| C  | -3.47896 | 3.20059  | 0.94874  |
| H  | -3.88987 | 3.5795   | -1.16421 |
| H  | -2.84583 | 2.32836  | 2.84958  |
| H  | -2.81659 | 4.07419  | 0.99903  |
| H  | -3.53101 | 1.17062  | 1.69718  |
| H  | -4.45982 | 3.49482  | 1.339    |
| H  | -4.43853 | 2.00318  | -0.5771  |
| H  | -0.3653  | -1.26685 | -0.82395 |
| O  | -1.57351 | -0.79049 | -1.84971 |
| N  | -2.78523 | -0.25962 | -1.87011 |
| H  | -0.74611 | 2.43356  | 1.68528  |
| H  | -2.17581 | 2.11493  | -2.0965  |
| C  | -3.65517 | -0.72216 | -0.82179 |
| C  | -3.26398 | -1.43663 | 0.32027  |
| C  | -5.01126 | -0.41315 | -1.02046 |



---

|   |          |          |          |
|---|----------|----------|----------|
| C | -4.22314 | -1.83666 | 1.24526  |
| H | -2.2224  | -1.647   | 0.51686  |
| C | -5.97107 | -0.82769 | -0.09835 |
| H | -5.28881 | 0.12609  | -1.91773 |
| C | -5.57804 | -1.54018 | 1.03817  |
| H | -3.91079 | -2.36968 | 2.13523  |
| H | -7.01662 | -0.59735 | -0.26383 |
| H | -6.31855 | -1.85899 | 1.76211  |
| H | 1.81942  | -4.83481 | -1.22269 |
| H | 0.01672  | -2.0177  | -3.0707  |

**TS of 1a cat.-CHCl<sub>3</sub>**

Temperature = 298.15 Kelvin

Pressure = 1 atm

Frequencies scaled by = 1

Electronic Energy (EE) = -1816.7594 Hartree

Zero-point Energy Correction = 0.603782 Hartree

Thermal Correction to Energy = 0.636373 Hartree

Thermal Correction to Enthalpy = 0.637317 Hartree

Thermal Correction to Free Energy = 0.538128 Hartree

EE + Zero-point Energy = -1816.1556 Hartree

EE + Thermal Energy Correction = -1816.123 Hartree

EE + Thermal Enthalpy Correction = -1816.1221 Hartree

EE + Thermal Free Energy Correction = -1816.2213 Hartree

E (Thermal) = 399.33 kcal/mol

Heat Capacity (Cv) = 125.796 cal/mol-kelvin

Entropy (S) = 208.761 cal/mol-kelvin

Symbolic Z-matrix:

Charge = 0 Multiplicity = 1

|   |          |          |          |
|---|----------|----------|----------|
| C | 1.01734  | 0.72436  | -0.04214 |
| C | 1.61894  | -0.58843 | -0.64476 |
| N | 0.5537   | -1.67713 | -0.4887  |
| N | -0.24276 | 1.03442  | -0.74762 |
| H | -0.21653 | 0.99562  | -1.76495 |
| H | 0.78116  | 0.52953  | 1.00528  |
| H | 1.76122  | -0.44436 | -1.71803 |
| C | 2.94477  | -0.95243 | -0.00111 |

---

|   |         |          |          |
|---|---------|----------|----------|
| C | 4.11518 | -0.88907 | -0.76928 |
| C | 3.02887 | -1.31461 | 1.3519   |
| C | 5.35487 | -1.18728 | -0.19944 |
| H | 4.05861 | -0.60257 | -1.81382 |
| C | 4.27003 | -1.61486 | 1.91752  |
| H | 2.12984 | -1.38405 | 1.9574   |
| C | 5.43439 | -1.55224 | 1.14661  |
| H | 6.25235 | -1.13487 | -0.8044  |
| H | 4.32571 | -1.89974 | 2.9617   |
| H | 6.3947  | -1.78644 | 1.59089  |
| C | 2.01936 | 1.8749   | -0.13588 |
| C | 2.68357 | 2.32217  | 1.01249  |
| C | 2.28047 | 2.49924  | -1.36305 |
| C | 3.6012  | 3.37319  | 0.93576  |
| H | 2.4881  | 1.84432  | 1.96585  |
| C | 3.19873 | 3.54761  | -1.44137 |
| H | 1.76384 | 2.17807  | -2.26085 |
| C | 3.86172 | 3.98731  | -0.29143 |
| H | 4.10822 | 3.71102  | 1.83196  |
| H | 3.39309 | 4.02294  | -2.39576 |
| H | 4.57196 | 4.8035   | -0.35216 |
| C | 0.7144  | -2.98793 | -1.28807 |
| C | 1.86817 | -3.85164 | -0.76679 |
| C | 0.81251 | -2.67702 | -2.78965 |
| H | 2.83456 | -3.39147 | -0.97933 |
| H | 1.78158 | -4.01211 | 0.31204  |

---

|    |          |          |          |
|----|----------|----------|----------|
| H  | 1.78634  | -2.24843 | -3.04676 |
| H  | 0.69736  | -3.6109  | -3.34857 |
| H  | -0.23459 | -3.4987  | -1.0938  |
| Cl | -0.32248 | -1.86394 | 2.50472  |
| H  | 0.40392  | -1.88678 | 0.54013  |
| C  | -1.35171 | 1.63742  | -0.19391 |
| C  | -2.34058 | 2.10988  | -1.01218 |
| C  | -1.45652 | 1.67148  | 1.3214   |
| C  | -3.6039  | 2.75148  | -0.49495 |
| C  | -2.87936 | 2.03412  | 1.8043   |
| H  | -1.17652 | 0.6912   | 1.72918  |
| C  | -3.46447 | 3.19568  | 0.97829  |
| H  | -3.87127 | 3.60533  | -1.12971 |
| H  | -2.83692 | 2.2947   | 2.8674   |
| H  | -2.79776 | 4.06515  | 1.04092  |
| H  | -3.52601 | 1.15575  | 1.69782  |
| H  | -4.44395 | 3.48939  | 1.37226  |
| H  | -4.43076 | 2.02534  | -0.56403 |
| H  | -0.36131 | -1.25917 | -0.82802 |
| O  | -1.5806  | -0.78313 | -1.85049 |
| N  | -2.78818 | -0.24438 | -1.87217 |
| H  | -0.73673 | 2.40945  | 1.70453  |
| H  | -2.16832 | 2.13865  | -2.0812  |
| C  | -3.66382 | -0.7073  | -0.82873 |
| C  | -3.27946 | -1.44406 | 0.30141  |
| C  | -5.01637 | -0.37942 | -1.0206  |

---

|   |          |          |          |
|---|----------|----------|----------|
| C | -4.24157 | -1.84645 | 1.22218  |
| H | -2.23964 | -1.67185 | 0.4869   |
| C | -5.97942 | -0.7951  | -0.10209 |
| H | -5.28996 | 0.1753   | -1.90959 |
| C | -5.59318 | -1.52924 | 1.02297  |
| H | -3.93596 | -2.39943 | 2.10237  |
| H | -7.02229 | -0.54942 | -0.26193 |
| H | -6.33622 | -1.84998 | 1.74338  |
| H | 1.82096  | -4.82454 | -1.26723 |
| H | 0.01379  | -1.98923 | -3.0831  |

**TS of 1a cat.-Chlorobenzene**

Temperature = 298.15 Kelvin

Pressure = 1 atm

Frequencies scaled by = 1

Electronic Energy (EE) = -1816.7609 Hartree

Zero-point Energy Correction = 0.60381 Hartree

Thermal Correction to Energy = 0.636397 Hartree

Thermal Correction to Enthalpy = 0.637341 Hartree

Thermal Correction to Free Energy = 0.53822 Hartree

EE + Zero-point Energy = -1816.1571 Hartree

EE + Thermal Energy Correction = -1816.1245 Hartree

EE + Thermal Enthalpy Correction = -1816.1235 Hartree

EE + Thermal Free Energy Correction = -1816.2226 Hartree

E (Thermal) = 399.345 kcal/mol

Heat Capacity (Cv) = 125.802 cal/mol-kelvin

Entropy (S) = 208.616 cal/mol-kelvin

Symbolic Z-matrix:

Charge = 0 Multiplicity = 1

|   |          |          |          |
|---|----------|----------|----------|
| C | 1.01784  | 0.72399  | -0.04275 |
| C | 1.61991  | -0.58855 | -0.64524 |
| N | 0.55464  | -1.67746 | -0.48991 |
| N | -0.2424  | 1.03359  | -0.74827 |
| H | -0.21532 | 0.99686  | -1.76568 |
| H | 0.7816   | 0.52921  | 1.00464  |
| H | 1.76274  | -0.44453 | -1.7184  |
| C | 2.94537  | -0.95233 | -0.00073 |

|   |         |          |          |
|---|---------|----------|----------|
| C | 4.11628 | -0.88861 | -0.76815 |
| C | 3.02875 | -1.3143  | 1.35238  |
| C | 5.35573 | -1.18621 | -0.19739 |
| H | 4.06027 | -0.60251 | -1.81281 |
| C | 4.26966 | -1.61393 | 1.91896  |
| H | 2.12941 | -1.38398 | 1.95735  |
| C | 5.43452 | -1.55091 | 1.14879  |
| H | 6.25356 | -1.13361 | -0.80178 |
| H | 4.32484 | -1.89858 | 2.96322  |
| H | 6.39463 | -1.78461 | 1.59376  |
| C | 2.01934 | 1.87504  | -0.13593 |
| C | 2.68127 | 2.32378  | 1.01323  |
| C | 2.28197 | 2.49864  | -1.36319 |
| C | 3.59819 | 3.3755   | 0.93724  |
| H | 2.48449 | 1.84665  | 1.96669  |
| C | 3.19954 | 3.5477   | -1.44074 |
| H | 1.76727 | 2.17636  | -2.26167 |
| C | 3.86028 | 3.98885  | -0.29003 |
| H | 4.10341 | 3.71448  | 1.83402  |
| H | 3.39515 | 4.02237  | -2.39519 |
| H | 4.56996 | 4.80556  | -0.35024 |
| C | 0.7154  | -2.9874  | -1.29103 |
| C | 1.86998 | -3.85102 | -0.77141 |
| C | 0.81255 | -2.67463 | -2.79225 |
| H | 2.83597 | -3.39008 | -0.98411 |
| H | 1.78419 | -4.01288 | 0.30728  |

---

|    |          |          |          |
|----|----------|----------|----------|
| H  | 1.78603  | -2.24538 | -3.0495  |
| H  | 0.69736  | -3.60794 | -3.35211 |
| H  | -0.23321 | -3.49886 | -1.09678 |
| Cl | -0.32319 | -1.87116 | 2.50532  |
| H  | 0.40534  | -1.8886  | 0.53833  |
| C  | -1.35108 | 1.63683  | -0.19412 |
| C  | -2.33965 | 2.11067  | -1.01186 |
| C  | -1.45593 | 1.66938  | 1.32124  |
| C  | -3.60236 | 2.75296  | -0.49399 |
| C  | -2.87852 | 2.03254  | 1.80451  |
| H  | -1.17657 | 0.68842  | 1.72783  |
| C  | -3.46259 | 3.1955   | 0.9797   |
| H  | -3.86887 | 3.60771  | -1.12789 |
| H  | -2.83597 | 2.29198  | 2.86789  |
| H  | -2.79509 | 4.06428  | 1.04333  |
| H  | -3.52592 | 1.15486  | 1.69691  |
| H  | -4.4418  | 3.48966  | 1.37397  |
| H  | -4.42995 | 2.02775  | -0.56385 |
| H  | -0.36041 | -1.25915 | -0.82848 |
| O  | -1.58179 | -0.78393 | -1.85023 |
| N  | -2.78881 | -0.24417 | -1.87224 |
| H  | -0.73566 | 2.40635  | 1.70533  |
| H  | -2.16749 | 2.14002  | -2.08089 |
| C  | -3.66496 | -0.70632 | -0.82887 |
| C  | -3.28124 | -1.44539 | 0.29998  |
| C  | -5.01703 | -0.37587 | -1.01955 |



---

|   |          |          |          |
|---|----------|----------|----------|
| C | -4.24348 | -1.84725 | 1.22086  |
| H | -2.24165 | -1.67561 | 0.48364  |
| C | -5.98025 | -0.79086 | -0.10086 |
| H | -5.29033 | 0.18032  | -1.90771 |
| C | -5.59464 | -1.52713 | 1.02303  |
| H | -3.93861 | -2.4024  | 2.09995  |
| H | -7.02276 | -0.54308 | -0.25972 |
| H | -6.33781 | -1.84748 | 1.74348  |
| H | 1.82299  | -4.82333 | -1.27298 |
| H | 0.01345  | -1.98676 | -3.08445 |

**TS of 1a cat.-Aniline**

Temperature = 298.15 Kelvin

Pressure = 1 atm

Frequencies scaled by = 1

Electronic Energy (EE) = -1816.7621 Hartree

Zero-point Energy Correction = 0.603839 Hartree

Thermal Correction to Energy = 0.636418 Hartree

Thermal Correction to Enthalpy = 0.637362 Hartree

Thermal Correction to Free Energy = 0.538352 Hartree

EE + Zero-point Energy = -1816.1583 Hartree

EE + Thermal Energy Correction = -1816.1257 Hartree

EE + Thermal Enthalpy Correction = -1816.1248 Hartree

EE + Thermal Free Energy Correction = -1816.2238 Hartree

E (Thermal) = 399.358 kcal/mol

Heat Capacity (Cv) = 125.808 cal/mol-kelvin

Entropy (S) = 208.384 cal/mol-kelvin

Symbolic Z-matrix:

Charge = 0 Multiplicity = 1

|   |          |          |          |
|---|----------|----------|----------|
| C | 1.01356  | 0.72431  | -0.04093 |
| C | 1.61502  | -0.58901 | -0.64328 |
| N | 0.55131  | -1.67801 | -0.4829  |
| N | -0.2453  | 1.03499  | -0.74808 |
| H | -0.22185 | 0.98541  | -1.76487 |
| H | 0.77627  | 0.52865  | 1.00625  |
| H | 1.75458  | -0.44545 | -1.71719 |
| C | 2.94302  | -0.95152 | -0.00323 |

|   |         |          |          |
|---|---------|----------|----------|
| C | 4.11117 | -0.88816 | -0.77469 |
| C | 3.03084 | -1.31367 | 1.34954  |
| C | 5.35241 | -1.18673 | -0.20866 |
| H | 4.05176 | -0.6004  | -1.81879 |
| C | 4.27358 | -1.61428 | 1.91122  |
| H | 2.1333  | -1.38263 | 1.95749  |
| C | 5.43564 | -1.55204 | 1.13696  |
| H | 6.24825 | -1.13396 | -0.81606 |
| H | 4.33189 | -1.89939 | 2.95518  |
| H | 6.39719 | -1.78663 | 1.5784   |
| C | 2.01661 | 1.87371  | -0.13551 |
| C | 2.68728 | 2.31636  | 1.01071  |
| C | 2.27324 | 2.50082  | -1.3621  |
| C | 3.60668 | 3.36555  | 0.9323   |
| H | 2.49577 | 1.83575  | 1.96345  |
| C | 3.19326 | 3.54735  | -1.44223 |
| H | 1.7508  | 2.18309  | -2.25788 |
| C | 3.8626  | 3.98246  | -0.29434 |
| H | 4.11888 | 3.69972  | 1.82692  |
| H | 3.38391 | 4.02514  | -2.39617 |
| H | 4.57423 | 4.79738  | -0.3562  |
| C | 0.71309 | -2.99316 | -1.27315 |
| C | 1.86513 | -3.85497 | -0.74474 |
| C | 0.81384 | -2.69181 | -2.77663 |
| H | 2.83234 | -3.39675 | -0.95773 |
| H | 1.77623 | -4.0088  | 0.3348   |

---

|    |          |          |          |
|----|----------|----------|----------|
| H  | 1.78845  | -2.26501 | -3.03415 |
| H  | 0.69977  | -3.62886 | -3.33048 |
| H  | -0.23664 | -3.50217 | -1.07749 |
| Cl | -0.31732 | -1.82666 | 2.50253  |
| H  | 0.39986  | -1.87984 | 0.54882  |
| C  | -1.35582 | 1.63799  | -0.19821 |
| C  | -2.34581 | 2.10201  | -1.02035 |
| C  | -1.46087 | 1.68254  | 1.31666  |
| C  | -3.61179 | 2.7422   | -0.50789 |
| C  | -2.88452 | 2.04559  | 1.7969   |
| H  | -1.17913 | 0.70598  | 1.7321   |
| C  | -3.4736  | 3.19857  | 0.96177  |
| H  | -3.883   | 3.58997  | -1.14919 |
| H  | -2.84228 | 2.31478  | 2.85784  |
| H  | -2.80986 | 4.07082  | 1.0171   |
| H  | -3.52854 | 1.16442  | 1.6984   |
| H  | -4.45403 | 3.49214  | 1.35357  |
| H  | -4.43545 | 2.01183  | -0.5709  |
| H  | -0.36418 | -1.263   | -0.82556 |
| O  | -1.57589 | -0.7861  | -1.85034 |
| N  | -2.78613 | -0.25238 | -1.87101 |
| H  | -0.74246 | 2.42499  | 1.69385  |
| H  | -2.17292 | 2.12521  | -2.08936 |
| C  | -3.65831 | -0.71587 | -0.82498 |
| C  | -3.26978 | -1.43898 | 0.31254  |
| C  | -5.01315 | -0.40016 | -1.02146 |

---

|   |          |          |          |
|---|----------|----------|----------|
| C | -4.23024 | -1.84072 | 1.23539  |
| H | -2.22883 | -1.65547 | 0.50554  |
| C | -5.97436 | -0.81595 | -0.10127 |
| H | -5.28909 | 0.14523  | -1.9155  |
| C | -5.58398 | -1.53696 | 1.03081  |
| H | -3.92041 | -2.38137 | 2.12167  |
| H | -7.01896 | -0.58018 | -0.26494 |
| H | -6.32558 | -1.85712 | 1.753    |
| H | 1.81816  | -4.83085 | -1.23953 |
| H | 0.01561  | -2.00575 | -3.07565 |

**TS of 1a cat.-THF**

Temperature = 298.15 Kelvin

Pressure = 1 atm

Frequencies scaled by = 1

Electronic Energy (EE) = -1816.7626 Hartree

Zero-point Energy Correction = 0.603847 Hartree

Thermal Correction to Energy = 0.636424 Hartree

Thermal Correction to Enthalpy = 0.637368 Hartree

Thermal Correction to Free Energy = 0.538388 Hartree

EE + Zero-point Energy = -1816.1588 Hartree

EE + Thermal Energy Correction = -1816.1262 Hartree

EE + Thermal Enthalpy Correction = -1816.1252 Hartree

EE + Thermal Free Energy Correction = -1816.2242 Hartree

E (Thermal) = 399.362 kcal/mol

Heat Capacity (Cv) = 125.811 cal/mol-kelvin

Entropy (S) = 208.322 cal/mol-kelvin

Symbolic Z-matrix:

Charge = 0 Multiplicity = 1

|   |          |          |          |
|---|----------|----------|----------|
| C | 1.0193   | 0.7182   | -0.05066 |
| C | 1.62873  | -0.59129 | -0.65061 |
| N | 0.56513  | -1.6836  | -0.50061 |
| N | -0.2408  | 1.02191  | -0.75972 |
| H | -0.20533 | 0.99883  | -1.77758 |
| H | 0.78004  | 0.5227   | 0.99581  |
| H | 1.7767   | -0.44864 | -1.72292 |
| C | 2.95141  | -0.94957 | 0.00258  |

---

|   |         |          |          |
|---|---------|----------|----------|
| C | 4.12716 | -0.87954 | -0.75716 |
| C | 3.0282  | -1.3089  | 1.35682  |
| C | 5.36461 | -1.16848 | -0.17718 |
| H | 4.07647 | -0.59646 | -1.80284 |
| C | 4.26706 | -1.5999  | 1.93274  |
| H | 2.12563 | -1.38207 | 1.95632  |
| C | 5.43679 | -1.53065 | 1.17024  |
| H | 6.26602 | -1.11178 | -0.77578 |
| H | 4.31759 | -1.88202 | 2.97797  |
| H | 6.39529 | -1.75752 | 1.62203  |
| C | 2.01453 | 1.87535  | -0.13611 |
| C | 2.64834 | 2.3414   | 1.0223   |
| C | 2.29629 | 2.48993  | -1.36389 |
| C | 3.5567  | 3.40143  | 0.95535  |
| H | 2.43571 | 1.87229  | 1.97642  |
| C | 3.20554 | 3.5471   | -1.43223 |
| H | 1.80452 | 2.15428  | -2.27007 |
| C | 3.83822 | 4.00566  | -0.27234 |
| H | 4.03975 | 3.75404  | 1.85908  |
| H | 3.41665 | 4.01412  | -2.38707 |
| H | 4.54124 | 4.82852  | -0.32594 |
| C | 0.72819 | -2.98704 | -1.31416 |
| C | 1.89075 | -3.84752 | -0.80747 |
| C | 0.81671 | -2.66067 | -2.8128  |
| H | 2.85261 | -3.37822 | -1.0207  |
| H | 1.8113  | -4.02125 | 0.27003  |

---

|    |          |          |          |
|----|----------|----------|----------|
| H  | 1.78662  | -2.22471 | -3.07139 |
| H  | 0.7027   | -3.59001 | -3.37941 |
| H  | -0.21653 | -3.50522 | -1.11935 |
| Cl | -0.32617 | -1.9257  | 2.50613  |
| H  | 0.4195   | -1.90534 | 0.52342  |
| C  | -1.34786 | 1.6292   | -0.20539 |
| C  | -2.33372 | 2.11032  | -1.02126 |
| C  | -1.45348 | 1.65645  | 1.31028  |
| C  | -3.59098 | 2.76154  | -0.50137 |
| C  | -2.87274 | 2.0305   | 1.79524  |
| H  | -1.18233 | 0.67076  | 1.71126  |
| C  | -3.44674 | 3.20025  | 0.97294  |
| H  | -3.85104 | 3.61938  | -1.13364 |
| H  | -2.8276  | 2.28788  | 2.85909  |
| H  | -2.77142 | 4.0628   | 1.03821  |
| H  | -3.52854 | 1.15926  | 1.68556  |
| H  | -4.42304 | 3.50231  | 1.3683   |
| H  | -4.42465 | 2.0435   | -0.57187 |
| H  | -0.35098 | -1.26416 | -0.83323 |
| O  | -1.59288 | -0.80111 | -1.84696 |
| N  | -2.79578 | -0.25456 | -1.87144 |
| H  | -0.72684 | 2.38454  | 1.69895  |
| H  | -2.16244 | 2.1386   | -2.09053 |
| C  | -3.67306 | -0.70595 | -0.8239  |
| C  | -3.29144 | -1.45765 | 0.29725  |
| C  | -5.02168 | -0.35608 | -1.00302 |



---

|   |          |          |          |
|---|----------|----------|----------|
| C | -4.25174 | -1.84991 | 1.22425  |
| H | -2.25352 | -1.7067  | 0.46473  |
| C | -5.98334 | -0.76055 | -0.07772 |
| H | -5.29507 | 0.20706  | -1.88675 |
| C | -5.59959 | -1.50751 | 1.03984  |
| H | -3.95031 | -2.41781 | 2.09651  |
| H | -7.0233  | -0.4969  | -0.22702 |
| H | -6.34167 | -1.82059 | 1.76453  |
| H | 1.84801  | -4.81497 | -1.31848 |
| H | 0.01347  | -1.97369 | -3.09524 |

**TS of 1a cat.-CH<sub>2</sub>Cl<sub>2</sub>**

Temperature = 298.15 Kelvin

Pressure = 1 atm

Frequencies scaled by = 1

Electronic Energy (EE) = -1816.7636 Hartree

Zero-point Energy Correction = 0.603855 Hartree

Thermal Correction to Energy = 0.636433 Hartree

Thermal Correction to Enthalpy = 0.637377 Hartree

Thermal Correction to Free Energy = 0.538427 Hartree

EE + Zero-point Energy = -1816.1598 Hartree

EE + Thermal Energy Correction = -1816.1272 Hartree

EE + Thermal Enthalpy Correction = -1816.1263 Hartree

EE + Thermal Free Energy Correction = -1816.2252 Hartree

E (Thermal) = 399.368 kcal/mol

Heat Capacity (Cv) = 125.82 cal/mol-kelvin

Entropy (S) = 208.259 cal/mol-kelvin

Symbolic Z-matrix:

Charge = 0 Multiplicity = 1

|   |          |          |          |
|---|----------|----------|----------|
| C | 1.01906  | 0.7196   | -0.04868 |
| C | 1.62677  | -0.59056 | -0.6493  |
| N | 0.56283  | -1.68219 | -0.49803 |
| N | -0.24118 | 1.02458  | -0.75677 |
| H | -0.20754 | 0.99883  | -1.77457 |
| H | 0.78067  | 0.52433  | 0.99804  |
| H | 1.77344  | -0.44758 | -1.7218  |
| C | 2.95015  | -0.95014 | 0.00174  |

---

|   |         |          |          |
|---|---------|----------|----------|
| C | 4.12468 | -0.88166 | -0.75998 |
| C | 3.02868 | -1.31004 | 1.35572  |
| C | 5.36269 | -1.17258 | -0.1823  |
| H | 4.07257 | -0.59807 | -1.80547 |
| C | 4.26811 | -1.603   | 1.92932  |
| H | 2.12696 | -1.38239 | 1.95663  |
| C | 5.43661 | -1.53522 | 1.16486  |
| H | 6.26317 | -1.11691 | -0.7824  |
| H | 4.31991 | -1.88563 | 2.97434  |
| H | 6.39556 | -1.76364 | 1.61494  |
| C | 2.01567 | 1.87541  | -0.13604 |
| C | 2.65657 | 2.3371   | 1.02014  |
| C | 2.29243 | 2.49244  | -1.36368 |
| C | 3.56694 | 3.3952   | 0.95103  |
| H | 2.44798 | 1.86592  | 1.97412  |
| C | 3.2036  | 3.54776  | -1.43422 |
| H | 1.79491 | 2.16018  | -2.26802 |
| C | 3.84338 | 4.00191  | -0.27656 |
| H | 4.05556 | 3.7444   | 1.85308  |
| H | 3.41066 | 4.01682  | -2.38896 |
| H | 4.54796 | 4.82335  | -0.33174 |
| C | 0.72546 | -2.98703 | -1.30899 |
| C | 1.88652 | -3.84803 | -0.79972 |
| C | 0.81559 | -2.66353 | -2.8082  |
| H | 2.84918 | -3.38052 | -1.01324 |
| H | 1.80607 | -4.019   | 0.27811  |

---

|    |          |          |          |
|----|----------|----------|----------|
| H  | 1.78619  | -2.22892 | -3.06667 |
| H  | 0.70132  | -3.59374 | -3.37334 |
| H  | -0.21999 | -3.50391 | -1.11416 |
| Cl | -0.32555 | -1.9138  | 2.50688  |
| H  | 0.41656  | -1.90169 | 0.52686  |
| C  | -1.34858 | 1.63082  | -0.2023  |
| C  | -2.33501 | 2.11065  | -1.01846 |
| C  | -1.4541  | 1.65868  | 1.3133   |
| C  | -3.59355 | 2.75963  | -0.49885 |
| C  | -2.87428 | 2.02964  | 1.79786  |
| H  | -1.18079 | 0.674    | 1.71521  |
| C  | -3.4506  | 3.19829  | 0.97563  |
| H  | -3.8549  | 3.61717  | -1.13101 |
| H  | -2.83002 | 2.2868   | 2.86178  |
| H  | -2.77716 | 4.06231  | 1.0412   |
| H  | -3.52797 | 1.15685  | 1.68788  |
| H  | -4.42767 | 3.4982   | 1.37076  |
| H  | -4.42587 | 2.04006  | -0.56981 |
| H  | -0.35308 | -1.26304 | -0.83191 |
| O  | -1.59027 | -0.79691 | -1.84763 |
| N  | -2.79404 | -0.25173 | -1.87179 |
| H  | -0.72915 | 2.38888  | 1.70128  |
| H  | -2.16345 | 2.13962  | -2.08764 |
| C  | -3.67138 | -0.70563 | -0.8255  |
| C  | -3.28956 | -1.45491 | 0.2972   |
| C  | -5.02072 | -0.35983 | -1.00735 |

---

|   |          |          |          |
|---|----------|----------|----------|
| C | -4.25055 | -1.84949 | 1.22251  |
| H | -2.25126 | -1.69997 | 0.46823  |
| C | -5.98297 | -0.76679 | -0.08381 |
| H | -5.29388 | 0.20206  | -1.89195 |
| C | -5.5991  | -1.51179 | 1.03498  |
| H | -3.94862 | -2.41491 | 2.09617  |
| H | -7.02346 | -0.50646 | -0.23535 |
| H | -6.3416  | -1.82663 | 1.75849  |
| H | 1.84275  | -4.81664 | -1.3085  |
| H | 0.01315  | -1.9764  | -3.09262 |

**TS of 1a cat.-EtCl<sub>2</sub>(chloroethane)**

Temperature = 298.15 Kelvin

Pressure = 1 atm

Frequencies scaled by = 1

Electronic Energy (EE) = -1816.7642 Hartree

Zero-point Energy Correction = 0.603852 Hartree

Thermal Correction to Energy = 0.636435 Hartree

Thermal Correction to Enthalpy = 0.637379 Hartree

Thermal Correction to Free Energy = 0.538416 Hartree

EE + Zero-point Energy = -1816.1604 Hartree

EE + Thermal Energy Correction = -1816.1278 Hartree

EE + Thermal Enthalpy Correction = -1816.1269 Hartree

EE + Thermal Free Energy Correction = -1816.2258 Hartree

E (Thermal) = 399.369 kcal/mol

Heat Capacity (Cv) = 125.828 cal/mol-kelvin

Entropy (S) = 208.285 cal/mol-kelvin

Symbolic Z-matrix:

Charge = 0 Multiplicity = 1

|   |          |          |          |
|---|----------|----------|----------|
| C | 1.01886  | 0.72132  | -0.0462  |
| C | 1.62446  | -0.58963 | -0.64768 |
| N | 0.55993  | -1.68026 | -0.49531 |
| N | -0.24141 | 1.02811  | -0.75324 |
| H | -0.20994 | 0.99918  | -1.77094 |
| H | 0.78131  | 0.52619  | 1.00076  |
| H | 1.76986  | -0.44609 | -1.72037 |
| C | 2.94849  | -0.95101 | 0.00106  |

---

|   |         |          |          |
|---|---------|----------|----------|
| C | 4.12177 | -0.88435 | -0.76266 |
| C | 3.02865 | -1.31181 | 1.35469  |
| C | 5.36024 | -1.17787 | -0.18742 |
| H | 4.06832 | -0.59987 | -1.80785 |
| C | 4.26855 | -1.60736 | 1.92582  |
| H | 2.12775 | -1.38318 | 1.95701  |
| C | 5.4358  | -1.54136 | 1.15937  |
| H | 6.2598  | -1.12341 | -0.78903 |
| H | 4.3215  | -1.89083 | 2.97055  |
| H | 6.39513 | -1.77183 | 1.60765  |
| C | 2.01729 | 1.87541  | -0.13552 |
| C | 2.66612 | 2.33198  | 1.01819  |
| C | 2.28869 | 2.49519  | -1.36291 |
| C | 3.57896 | 3.38772  | 0.94675  |
| H | 2.46194 | 1.85841  | 1.97191  |
| C | 3.20225 | 3.54822  | -1.43581 |
| H | 1.78474 | 2.1669   | -2.26519 |
| C | 3.84997 | 3.99722  | -0.28062 |
| H | 4.07383 | 3.7329   | 1.84694  |
| H | 3.40498 | 4.0196   | -2.39036 |
| H | 4.55648 | 4.8169   | -0.3375  |
| C | 0.72192 | -2.98668 | -1.3033  |
| C | 1.88072 | -3.84873 | -0.79067 |
| C | 0.81453 | -2.66643 | -2.80312 |
| H | 2.84455 | -3.38354 | -1.00395 |
| H | 1.79851 | -4.01668 | 0.28746  |

---

|    |          |          |          |
|----|----------|----------|----------|
| H  | 1.78615  | -2.23364 | -3.06105 |
| H  | 0.69991  | -3.59756 | -3.36668 |
| H  | -0.22463 | -3.50174 | -1.10884 |
| Cl | -0.32524 | -1.90011 | 2.50675  |
| H  | 0.4126   | -1.89723 | 0.53059  |
| C  | -1.34925 | 1.63305  | -0.19864 |
| C  | -2.33633 | 2.11137  | -1.01515 |
| C  | -1.45474 | 1.66158  | 1.31689  |
| C  | -3.59637 | 2.75773  | -0.4959  |
| C  | -2.87595 | 2.02912  | 1.80097  |
| H  | -1.1791  | 0.67801  | 1.71986  |
| C  | -3.4549  | 3.19646  | 0.97873  |
| H  | -3.85928 | 3.61486  | -1.12801 |
| H  | -2.83262 | 2.28613  | 2.86494  |
| H  | -2.78361 | 4.06214  | 1.04455  |
| H  | -3.52726 | 1.1546   | 1.69081  |
| H  | -4.43283 | 3.49394  | 1.37359  |
| H  | -4.42711 | 2.03633  | -0.56732 |
| H  | -0.35561 | -1.26124 | -0.83079 |
| O  | -1.58706 | -0.79139 | -1.84886 |
| N  | -2.79186 | -0.24787 | -1.87245 |
| H  | -0.73168 | 2.39409  | 1.7041   |
| H  | -2.1644  | 2.14119  | -2.08423 |
| C  | -3.66926 | -0.70506 | -0.82775 |
| C  | -3.28727 | -1.45169 | 0.29667  |
| C  | -5.01944 | -0.36416 | -1.01286 |



---

|   |          |          |          |
|---|----------|----------|----------|
| C | -4.24909 | -1.84929 | 1.21982  |
| H | -2.24857 | -1.69195 | 0.47208  |
| C | -5.98242 | -0.77436 | -0.09159 |
| H | -5.29229 | 0.19642  | -1.89838 |
| C | -5.59845 | -1.51725 | 1.02854  |
| H | -3.94657 | -2.41191 | 2.09505  |
| H | -7.02353 | -0.51804 | -0.24581 |
| H | -6.34148 | -1.83439 | 1.75051  |
| H | 1.83572  | -4.81856 | -1.29707 |
| H | 0.01329  | -1.97893 | -3.09006 |

**TS of 1a cat.-Cyclohexanone**

Temperature = 298.15 Kelvin

Pressure = 1 atm

Frequencies scaled by = 1

Electronic Energy (EE) = -1816.766 Hartree

Zero-point Energy Correction = 0.603813 Hartree

Thermal Correction to Energy = 0.636422 Hartree

Thermal Correction to Enthalpy = 0.637366 Hartree

Thermal Correction to Free Energy = 0.538254 Hartree

EE + Zero-point Energy = -1816.1622 Hartree

EE + Thermal Energy Correction = -1816.1295 Hartree

EE + Thermal Enthalpy Correction = -1816.1286 Hartree

EE + Thermal Free Energy Correction = -1816.2277 Hartree

E (Thermal) = 399.361 kcal/mol

Heat Capacity (Cv) = 125.859 cal/mol-kelvin

Entropy (S) = 208.599 cal/mol-kelvin

Symbolic Z-matrix:

Charge = 0 Multiplicity = 1

|   |          |          |          |
|---|----------|----------|----------|
| C | 1.0193   | 0.7182   | -0.05066 |
| C | 1.62873  | -0.59129 | -0.65061 |
| N | 0.56513  | -1.6836  | -0.50061 |
| N | -0.2408  | 1.02191  | -0.75972 |
| H | -0.20533 | 0.99883  | -1.77758 |
| H | 0.78004  | 0.5227   | 0.99581  |
| H | 1.7767   | -0.44864 | -1.72292 |
| C | 2.95141  | -0.94957 | 0.00258  |

---

|   |         |          |          |
|---|---------|----------|----------|
| C | 4.12716 | -0.87954 | -0.75716 |
| C | 3.0282  | -1.3089  | 1.35682  |
| C | 5.36461 | -1.16848 | -0.17718 |
| H | 4.07647 | -0.59646 | -1.80284 |
| C | 4.26706 | -1.5999  | 1.93274  |
| H | 2.12563 | -1.38207 | 1.95632  |
| C | 5.43679 | -1.53065 | 1.17024  |
| H | 6.26602 | -1.11178 | -0.77578 |
| H | 4.31759 | -1.88202 | 2.97797  |
| H | 6.39529 | -1.75752 | 1.62203  |
| C | 2.01453 | 1.87535  | -0.13611 |
| C | 2.64834 | 2.3414   | 1.0223   |
| C | 2.29629 | 2.48993  | -1.36389 |
| C | 3.5567  | 3.40143  | 0.95535  |
| H | 2.43571 | 1.87229  | 1.97642  |
| C | 3.20554 | 3.5471   | -1.43223 |
| H | 1.80452 | 2.15428  | -2.27007 |
| C | 3.83822 | 4.00566  | -0.27234 |
| H | 4.03975 | 3.75404  | 1.85908  |
| H | 3.41665 | 4.01412  | -2.38707 |
| H | 4.54124 | 4.82852  | -0.32594 |
| C | 0.72819 | -2.98704 | -1.31416 |
| C | 1.89075 | -3.84752 | -0.80747 |
| C | 0.81671 | -2.66067 | -2.8128  |
| H | 2.85261 | -3.37822 | -1.0207  |
| H | 1.8113  | -4.02125 | 0.27003  |

---

|    |          |          |          |
|----|----------|----------|----------|
| H  | 1.78662  | -2.22471 | -3.07139 |
| H  | 0.7027   | -3.59001 | -3.37941 |
| H  | -0.21653 | -3.50522 | -1.11935 |
| Cl | -0.32617 | -1.9257  | 2.50613  |
| H  | 0.4195   | -1.90534 | 0.52342  |
| C  | -1.34786 | 1.6292   | -0.20539 |
| C  | -2.33372 | 2.11032  | -1.02126 |
| C  | -1.45348 | 1.65645  | 1.31028  |
| C  | -3.59098 | 2.76154  | -0.50137 |
| C  | -2.87274 | 2.0305   | 1.79524  |
| H  | -1.18233 | 0.67076  | 1.71126  |
| C  | -3.44674 | 3.20025  | 0.97294  |
| H  | -3.85104 | 3.61938  | -1.13364 |
| H  | -2.8276  | 2.28788  | 2.85909  |
| H  | -2.77142 | 4.0628   | 1.03821  |
| H  | -3.52854 | 1.15926  | 1.68556  |
| H  | -4.42304 | 3.50231  | 1.3683   |
| H  | -4.42465 | 2.0435   | -0.57187 |
| H  | -0.35098 | -1.26416 | -0.83323 |
| O  | -1.59288 | -0.80111 | -1.84696 |
| N  | -2.79578 | -0.25456 | -1.87144 |
| H  | -0.72684 | 2.38454  | 1.69895  |
| H  | -2.16244 | 2.1386   | -2.09053 |
| C  | -3.67306 | -0.70595 | -0.8239  |
| C  | -3.29144 | -1.45765 | 0.29725  |
| C  | -5.02168 | -0.35608 | -1.00302 |

---

|   |          |          |          |
|---|----------|----------|----------|
| C | -4.25174 | -1.84991 | 1.22425  |
| H | -2.25352 | -1.7067  | 0.46473  |
| C | -5.98334 | -0.76055 | -0.07772 |
| H | -5.29507 | 0.20706  | -1.88675 |
| C | -5.59959 | -1.50751 | 1.03984  |
| H | -3.95031 | -2.41781 | 2.09651  |
| H | -7.0233  | -0.4969  | -0.22702 |
| H | -6.34167 | -1.82059 | 1.76453  |
| H | 1.84801  | -4.81497 | -1.31848 |
| H | 0.01347  | -1.97369 | -3.09524 |

**TS of 1a cat.-Aceton**

Temperature = 298.15 Kelvin

Pressure = 1 atm

Frequencies scaled by = 1

Electronic Energy (EE) = -1816.7668 Hartree

Zero-point Energy Correction = 0.603786 Hartree

Thermal Correction to Energy = 0.636411 Hartree

Thermal Correction to Enthalpy = 0.637356 Hartree

Thermal Correction to Free Energy = 0.538139 Hartree

EE + Zero-point Energy = -1816.163 Hartree

EE + Thermal Energy Correction = -1816.1304 Hartree

EE + Thermal Enthalpy Correction = -1816.1294 Hartree

EE + Thermal Free Energy Correction = -1816.2286 Hartree

E (Thermal) = 399.354 kcal/mol

Heat Capacity (Cv) = 125.876 cal/mol-kelvin

Entropy (S) = 208.818 cal/mol-kelvin

Symbolic Z-matrix:

Charge = 0 Multiplicity = 1

|   |          |          |          |
|---|----------|----------|----------|
| C | 1.01894  | 0.72063  | -0.04729 |
| C | 1.62533  | -0.59006 | -0.64838 |
| N | 0.56105  | -1.68108 | -0.49626 |
| N | -0.24138 | 1.02664  | -0.75468 |
| H | -0.20912 | 0.99889  | -1.77241 |
| H | 0.78115  | 0.52553  | 0.99961  |
| H | 1.77113  | -0.44683 | -1.72101 |
| C | 2.94916  | -0.95066 | 0.00118  |

---

|   |         |          |          |
|---|---------|----------|----------|
| C | 4.12286 | -0.88333 | -0.76186 |
| C | 3.0288  | -1.311   | 1.35497  |
| C | 5.36121 | -1.17577 | -0.18575 |
| H | 4.06984 | -0.5993  | -1.80719 |
| C | 4.26858 | -1.60547 | 1.92699  |
| H | 2.12764 | -1.38272 | 1.95683  |
| C | 5.43625 | -1.53881 | 1.16121  |
| H | 6.26108 | -1.12087 | -0.78685 |
| H | 4.32117 | -1.88852 | 2.97185  |
| H | 6.39547 | -1.76842 | 1.61013  |
| C | 2.01664 | 1.87539  | -0.13602 |
| C | 2.66248 | 2.33405  | 1.01857  |
| C | 2.29001 | 2.49402  | -1.36358 |
| C | 3.57434 | 3.39072  | 0.94789  |
| H | 2.45666 | 1.86149  | 1.97245  |
| C | 3.20263 | 3.54795  | -1.43571 |
| H | 1.78849 | 2.16412  | -2.26661 |
| C | 3.84736 | 3.99904  | -0.27964 |
| H | 4.06685 | 3.73753  | 1.84874  |
| H | 3.40695 | 4.01836  | -2.39039 |
| H | 4.5531  | 4.81941  | -0.33598 |
| C | 0.72325 | -2.98694 | -1.30533 |
| C | 1.88304 | -3.8485  | -0.79409 |
| C | 0.81471 | -2.66552 | -2.80495 |
| H | 2.84636 | -3.38238 | -1.00764 |
| H | 1.80167 | -4.01754 | 0.28394  |

---

|    |          |          |          |
|----|----------|----------|----------|
| H  | 1.78589  | -2.23202 | -3.06324 |
| H  | 0.70019  | -3.59634 | -3.36904 |
| H  | -0.22282 | -3.50274 | -1.11059 |
| Cl | -0.32518 | -1.90528 | 2.50708  |
| H  | 0.41423  | -1.89897 | 0.52927  |
| C  | -1.349   | 1.63214  | -0.20009 |
| C  | -2.33588 | 2.111    | -1.01643 |
| C  | -1.45439 | 1.66052  | 1.31548  |
| C  | -3.59529 | 2.75843  | -0.49699 |
| C  | -2.87518 | 2.0294   | 1.7998   |
| H  | -1.17962 | 0.67655  | 1.71808  |
| C  | -3.45315 | 3.19721  | 0.97754  |
| H  | -3.85762 | 3.61568  | -1.12916 |
| H  | -2.83143 | 2.28652  | 2.86374  |
| H  | -2.78103 | 4.06224  | 1.04318  |
| H  | -3.52741 | 1.15554  | 1.68979  |
| H  | -4.43073 | 3.49565  | 1.37255  |
| H  | -4.42666 | 2.03775  | -0.56815 |
| H  | -0.35467 | -1.26205 | -0.83106 |
| O  | -1.58845 | -0.79372 | -1.84816 |
| N  | -2.79284 | -0.24953 | -1.87197 |
| H  | -0.73058 | 2.39217  | 1.70288  |
| H  | -2.16416 | 2.14041  | -2.08556 |
| C  | -3.67017 | -0.70533 | -0.82657 |
| C  | -3.2882  | -1.45293 | 0.29721  |
| C  | -5.02003 | -0.3625  | -1.01035 |



---

|   |          |          |          |
|---|----------|----------|----------|
| C | -4.24965 | -1.84927 | 1.22128  |
| H | -2.24964 | -1.69507 | 0.47085  |
| C | -5.98269 | -0.77135 | -0.08811 |
| H | -5.29305 | 0.19853  | -1.89553 |
| C | -5.59871 | -1.515   | 1.03153  |
| H | -3.94734 | -2.41293 | 2.09592  |
| H | -7.02356 | -0.51345 | -0.24124 |
| H | -6.3415  | -1.83117 | 1.75416  |
| H | 1.83848  | -4.81789 | -1.30134 |
| H | 0.01295  | -1.97821 | -3.09087 |

**TS of 1a cat.-EtOH**

Temperature = 298.15 Kelvin

Pressure = 1 atm

Frequencies scaled by = 1

Electronic Energy (EE) = -1816.7672 Hartree

Zero-point Energy Correction = 0.603765 Hartree

Thermal Correction to Energy = 0.636402 Hartree

Thermal Correction to Enthalpy = 0.637347 Hartree

Thermal Correction to Free Energy = 0.538055 Hartree

EE + Zero-point Energy = -1816.1635 Hartree

EE + Thermal Energy Correction = -1816.1308 Hartree

EE + Thermal Enthalpy Correction = -1816.1299 Hartree

EE + Thermal Free Energy Correction = -1816.2292 Hartree

E (Thermal) = 399.349 kcal/mol

Heat Capacity (Cv) = 125.888 cal/mol-kelvin

Entropy (S) = 208.976 cal/mol-kelvin

Symbolic Z-matrix:

Charge = 0 Multiplicity = 1

|   |          |          |          |
|---|----------|----------|----------|
| C | 1.01903  | 0.71983  | -0.04837 |
| C | 1.62645  | -0.59045 | -0.64909 |
| N | 0.56244  | -1.68194 | -0.49762 |
| N | -0.24123 | 1.02504  | -0.7563  |
| H | -0.2079  | 0.99885  | -1.77408 |
| H | 0.78078  | 0.5246   | 0.9984   |
| H | 1.77292  | -0.44741 | -1.72162 |
| C | 2.94994  | -0.95025 | 0.00161  |

---

|   |         |          |          |
|---|---------|----------|----------|
| C | 4.12427 | -0.88203 | -0.76041 |
| C | 3.02872 | -1.31024 | 1.35555  |
| C | 5.36236 | -1.17328 | -0.18309 |
| H | 4.07195 | -0.59834 | -1.80586 |
| C | 4.26823 | -1.60354 | 1.92879  |
| H | 2.12713 | -1.38246 | 1.95668  |
| C | 5.43654 | -1.53601 | 1.16403  |
| H | 6.2627  | -1.11778 | -0.78342 |
| H | 4.32021 | -1.88627 | 2.97377  |
| H | 6.39556 | -1.76469 | 1.61384  |
| C | 2.01588 | 1.87541  | -0.13603 |
| C | 2.65791 | 2.33641  | 1.01979  |
| C | 2.29186 | 2.49281  | -1.36366 |
| C | 3.56861 | 3.39419  | 0.95032  |
| H | 2.44995 | 1.86491  | 1.97375  |
| C | 3.20336 | 3.54782  | -1.43455 |
| H | 1.79343 | 2.16109  | -2.2677  |
| C | 3.84427 | 4.00127  | -0.27725 |
| H | 4.05811 | 3.74285  | 1.8521   |
| H | 3.40979 | 4.01719  | -2.38928 |
| H | 4.54911 | 4.82247  | -0.3327  |
| C | 0.72498 | -2.98702 | -1.30816 |
| C | 1.88576 | -3.84813 | -0.79846 |
| C | 0.81539 | -2.66398 | -2.80747 |
| H | 2.84857 | -3.38092 | -1.012   |
| H | 1.80512 | -4.01866 | 0.27941  |

---

|    |          |          |          |
|----|----------|----------|----------|
| H  | 1.78612  | -2.22961 | -3.0659  |
| H  | 0.70107  | -3.59432 | -3.37237 |
| H  | -0.2206  | -3.50366 | -1.11335 |
| Cl | -0.32547 | -1.91189 | 2.50696  |
| H  | 0.41605  | -1.90109 | 0.52741  |
| C  | -1.34867 | 1.63111  | -0.2018  |
| C  | -2.33521 | 2.11073  | -1.01799 |
| C  | -1.45417 | 1.65908  | 1.3138   |
| C  | -3.59394 | 2.75936  | -0.49842 |
| C  | -2.8745  | 2.02956  | 1.7983   |
| H  | -1.18053 | 0.67455  | 1.71586  |
| C  | -3.45118 | 3.19803  | 0.97607  |
| H  | -3.85551 | 3.61684  | -1.13058 |
| H  | -2.83035 | 2.28669  | 2.86222  |
| H  | -2.77804 | 4.06227  | 1.04167  |
| H  | -3.52785 | 1.15652  | 1.6883   |
| H  | -4.42837 | 3.4976   | 1.37118  |
| H  | -4.42605 | 2.03954  | -0.56944 |
| H  | -0.35343 | -1.26283 | -0.83171 |
| O  | -1.58986 | -0.7962  | -1.84775 |
| N  | -2.79377 | -0.25124 | -1.87184 |
| H  | -0.72948 | 2.3896   | 1.70165  |
| H  | -2.16361 | 2.1398   | -2.08717 |
| C  | -3.67111 | -0.70556 | -0.82575 |
| C  | -3.28927 | -1.45447 | 0.2972   |
| C  | -5.02057 | -0.36042 | -1.00804 |

---

|   |          |          |          |
|---|----------|----------|----------|
| C | -4.25036 | -1.84943 | 1.22222  |
| H | -2.25091 | -1.69887 | 0.46881  |
| C | -5.98291 | -0.7678  | -0.08479 |
| H | -5.29369 | 0.20127  | -1.89276 |
| C | -5.59902 | -1.5125  | 1.03419  |
| H | -3.94835 | -2.41446 | 2.09611  |
| H | -7.02349 | -0.50801 | -0.23669 |
| H | -6.34159 | -1.82764 | 1.7575   |
| H | 1.84182  | -4.81691 | -1.3069  |
| H | 0.0131   | -1.97681 | -3.09222 |

**TS of 1a cat.-MeOH**

Temperature = 298.15 Kelvin

Pressure = 1 atm

Frequencies scaled by = 1

Electronic Energy (EE) = -1816.7678 Hartree

Zero-point Energy Correction = 0.603739 Hartree

Thermal Correction to Energy = 0.636391 Hartree

Thermal Correction to Enthalpy = 0.637335 Hartree

Thermal Correction to Free Energy = 0.537951 Hartree

EE + Zero-point Energy = -1816.164 Hartree

EE + Thermal Energy Correction = -1816.1314 Hartree

EE + Thermal Enthalpy Correction = -1816.1304 Hartree

EE + Thermal Free Energy Correction = -1816.2298 Hartree

E (Thermal) = 399.342 kcal/mol

Heat Capacity (Cv) = 125.901 cal/mol-kelvin

Entropy (S) = 209.172 cal/mol-kelvin

Symbolic Z-matrix:

Charge = 0 Multiplicity = 1

|   |          |          |          |
|---|----------|----------|----------|
| C | 1.0193   | 0.7182   | -0.05066 |
| C | 1.62873  | -0.59129 | -0.65061 |
| N | 0.56513  | -1.6836  | -0.50061 |
| N | -0.2408  | 1.02191  | -0.75972 |
| H | -0.20533 | 0.99883  | -1.77758 |
| H | 0.78004  | 0.5227   | 0.99581  |
| H | 1.7767   | -0.44864 | -1.72292 |
| C | 2.95141  | -0.94957 | 0.00258  |

---

|   |         |          |          |
|---|---------|----------|----------|
| C | 4.12716 | -0.87954 | -0.75716 |
| C | 3.0282  | -1.3089  | 1.35682  |
| C | 5.36461 | -1.16848 | -0.17718 |
| H | 4.07647 | -0.59646 | -1.80284 |
| C | 4.26706 | -1.5999  | 1.93274  |
| H | 2.12563 | -1.38207 | 1.95632  |
| C | 5.43679 | -1.53065 | 1.17024  |
| H | 6.26602 | -1.11178 | -0.77578 |
| H | 4.31759 | -1.88202 | 2.97797  |
| H | 6.39529 | -1.75752 | 1.62203  |
| C | 2.01453 | 1.87535  | -0.13611 |
| C | 2.64834 | 2.3414   | 1.0223   |
| C | 2.29629 | 2.48993  | -1.36389 |
| C | 3.5567  | 3.40143  | 0.95535  |
| H | 2.43571 | 1.87229  | 1.97642  |
| C | 3.20554 | 3.5471   | -1.43223 |
| H | 1.80452 | 2.15428  | -2.27007 |
| C | 3.83822 | 4.00566  | -0.27234 |
| H | 4.03975 | 3.75404  | 1.85908  |
| H | 3.41665 | 4.01412  | -2.38707 |
| H | 4.54124 | 4.82852  | -0.32594 |
| C | 0.72819 | -2.98704 | -1.31416 |
| C | 1.89075 | -3.84752 | -0.80747 |
| C | 0.81671 | -2.66067 | -2.8128  |
| H | 2.85261 | -3.37822 | -1.0207  |
| H | 1.8113  | -4.02125 | 0.27003  |

---

|    |          |          |          |
|----|----------|----------|----------|
| H  | 1.78662  | -2.22471 | -3.07139 |
| H  | 0.7027   | -3.59001 | -3.37941 |
| H  | -0.21653 | -3.50522 | -1.11935 |
| Cl | -0.32617 | -1.9257  | 2.50613  |
| H  | 0.4195   | -1.90534 | 0.52342  |
| C  | -1.34786 | 1.6292   | -0.20539 |
| C  | -2.33372 | 2.11032  | -1.02126 |
| C  | -1.45348 | 1.65645  | 1.31028  |
| C  | -3.59098 | 2.76154  | -0.50137 |
| C  | -2.87274 | 2.0305   | 1.79524  |
| H  | -1.18233 | 0.67076  | 1.71126  |
| C  | -3.44674 | 3.20025  | 0.97294  |
| H  | -3.85104 | 3.61938  | -1.13364 |
| H  | -2.8276  | 2.28788  | 2.85909  |
| H  | -2.77142 | 4.0628   | 1.03821  |
| H  | -3.52854 | 1.15926  | 1.68556  |
| H  | -4.42304 | 3.50231  | 1.3683   |
| H  | -4.42465 | 2.0435   | -0.57187 |
| H  | -0.35098 | -1.26416 | -0.83323 |
| O  | -1.59288 | -0.80111 | -1.84696 |
| N  | -2.79578 | -0.25456 | -1.87144 |
| H  | -0.72684 | 2.38454  | 1.69895  |
| H  | -2.16244 | 2.1386   | -2.09053 |
| C  | -3.67306 | -0.70595 | -0.8239  |
| C  | -3.29144 | -1.45765 | 0.29725  |
| C  | -5.02168 | -0.35608 | -1.00302 |



---

|   |          |          |          |
|---|----------|----------|----------|
| C | -4.25174 | -1.84991 | 1.22425  |
| H | -2.25352 | -1.7067  | 0.46473  |
| C | -5.98334 | -0.76055 | -0.07772 |
| H | -5.29507 | 0.20706  | -1.88675 |
| C | -5.59959 | -1.50751 | 1.03984  |
| H | -3.95031 | -2.41781 | 2.09651  |
| H | -7.0233  | -0.4969  | -0.22702 |
| H | -6.34167 | -1.82059 | 1.76453  |
| H | 1.84801  | -4.81497 | -1.31848 |
| H | 0.01347  | -1.97369 | -3.09524 |

**TS of 1a cat.-Acetonitrile**

Temperature = 298.15 Kelvin

Pressure = 1 atm

Frequencies scaled by = 1

Electronic Energy (EE) = -1816.7679 Hartree

Zero-point Energy Correction = 0.603732 Hartree

Thermal Correction to Energy = 0.636388 Hartree

Thermal Correction to Enthalpy = 0.637332 Hartree

Thermal Correction to Free Energy = 0.537922 Hartree

EE + Zero-point Energy = -1816.1642 Hartree

EE + Thermal Energy Correction = -1816.1315 Hartree

EE + Thermal Enthalpy Correction = -1816.1306 Hartree

EE + Thermal Free Energy Correction = -1816.23 Hartree

E (Thermal) = 399.34 kcal/mol

Heat Capacity (Cv) = 125.905 cal/mol-kelvin

Entropy (S) = 209.226 cal/mol-kelvin

Symbolic Z-matrix:

Charge = 0 Multiplicity = 1

|   |          |          |          |
|---|----------|----------|----------|
| C | 1.0193   | 0.7182   | -0.05066 |
| C | 1.62873  | -0.59129 | -0.65061 |
| N | 0.56513  | -1.6836  | -0.50061 |
| N | -0.2408  | 1.02191  | -0.75972 |
| H | -0.20533 | 0.99883  | -1.77758 |
| H | 0.78004  | 0.5227   | 0.99581  |
| H | 1.7767   | -0.44864 | -1.72292 |
| C | 2.95141  | -0.94957 | 0.00258  |

---

|   |         |          |          |
|---|---------|----------|----------|
| C | 4.12716 | -0.87954 | -0.75716 |
| C | 3.0282  | -1.3089  | 1.35682  |
| C | 5.36461 | -1.16848 | -0.17718 |
| H | 4.07647 | -0.59646 | -1.80284 |
| C | 4.26706 | -1.5999  | 1.93274  |
| H | 2.12563 | -1.38207 | 1.95632  |
| C | 5.43679 | -1.53065 | 1.17024  |
| H | 6.26602 | -1.11178 | -0.77578 |
| H | 4.31759 | -1.88202 | 2.97797  |
| H | 6.39529 | -1.75752 | 1.62203  |
| C | 2.01453 | 1.87535  | -0.13611 |
| C | 2.64834 | 2.3414   | 1.0223   |
| C | 2.29629 | 2.48993  | -1.36389 |
| C | 3.5567  | 3.40143  | 0.95535  |
| H | 2.43571 | 1.87229  | 1.97642  |
| C | 3.20554 | 3.5471   | -1.43223 |
| H | 1.80452 | 2.15428  | -2.27007 |
| C | 3.83822 | 4.00566  | -0.27234 |
| H | 4.03975 | 3.75404  | 1.85908  |
| H | 3.41665 | 4.01412  | -2.38707 |
| H | 4.54124 | 4.82852  | -0.32594 |
| C | 0.72819 | -2.98704 | -1.31416 |
| C | 1.89075 | -3.84752 | -0.80747 |
| C | 0.81671 | -2.66067 | -2.8128  |
| H | 2.85261 | -3.37822 | -1.0207  |
| H | 1.8113  | -4.02125 | 0.27003  |

---

|    |          |          |          |
|----|----------|----------|----------|
| H  | 1.78662  | -2.22471 | -3.07139 |
| H  | 0.7027   | -3.59001 | -3.37941 |
| H  | -0.21653 | -3.50522 | -1.11935 |
| Cl | -0.32617 | -1.9257  | 2.50613  |
| H  | 0.4195   | -1.90534 | 0.52342  |
| C  | -1.34786 | 1.6292   | -0.20539 |
| C  | -2.33372 | 2.11032  | -1.02126 |
| C  | -1.45348 | 1.65645  | 1.31028  |
| C  | -3.59098 | 2.76154  | -0.50137 |
| C  | -2.87274 | 2.0305   | 1.79524  |
| H  | -1.18233 | 0.67076  | 1.71126  |
| C  | -3.44674 | 3.20025  | 0.97294  |
| H  | -3.85104 | 3.61938  | -1.13364 |
| H  | -2.8276  | 2.28788  | 2.85909  |
| H  | -2.77142 | 4.0628   | 1.03821  |
| H  | -3.52854 | 1.15926  | 1.68556  |
| H  | -4.42304 | 3.50231  | 1.3683   |
| H  | -4.42465 | 2.0435   | -0.57187 |
| H  | -0.35098 | -1.26416 | -0.83323 |
| O  | -1.59288 | -0.80111 | -1.84696 |
| N  | -2.79578 | -0.25456 | -1.87144 |
| H  | -0.72684 | 2.38454  | 1.69895  |
| H  | -2.16244 | 2.1386   | -2.09053 |
| C  | -3.67306 | -0.70595 | -0.8239  |
| C  | -3.29144 | -1.45765 | 0.29725  |
| C  | -5.02168 | -0.35608 | -1.00302 |

---

|   |          |          |          |
|---|----------|----------|----------|
| C | -4.25174 | -1.84991 | 1.22425  |
| H | -2.25352 | -1.7067  | 0.46473  |
| C | -5.98334 | -0.76055 | -0.07772 |
| H | -5.29507 | 0.20706  | -1.88675 |
| C | -5.59959 | -1.50751 | 1.03984  |
| H | -3.95031 | -2.41781 | 2.09651  |
| H | -7.0233  | -0.4969  | -0.22702 |
| H | -6.34167 | -1.82059 | 1.76453  |
| H | 1.84801  | -4.81497 | -1.31848 |
| H | 0.01347  | -1.97369 | -3.09524 |

**TS of 1a cat.-Nitromethane**

Temperature = 298.15 Kelvin

Pressure = 1 atm

Frequencies scaled by = 1

Electronic Energy (EE) = -1816.768 Hartree

Zero-point Energy Correction = 0.603731 Hartree

Thermal Correction to Energy = 0.636387 Hartree

Thermal Correction to Enthalpy = 0.637332 Hartree

Thermal Correction to Free Energy = 0.537915 Hartree

EE + Zero-point Energy = -1816.1642 Hartree

EE + Thermal Energy Correction = -1816.1316 Hartree

EE + Thermal Enthalpy Correction = -1816.1306 Hartree

EE + Thermal Free Energy Correction = -1816.23 Hartree

E (Thermal) = 399.339 kcal/mol

Heat Capacity (Cv) = 125.906 cal/mol-kelvin

Entropy (S) = 209.24 cal/mol-kelvin

Symbolic Z-matrix:

Charge = 0 Multiplicity = 1

|   |          |          |          |
|---|----------|----------|----------|
| C | 0.99971  | 0.7278   | -0.03852 |
| C | 1.5959   | -0.58908 | -0.64119 |
| N | 0.534    | -1.67533 | -0.46323 |
| N | -0.25379 | 1.04506  | -0.75083 |
| H | -0.24661 | 0.94681  | -1.76411 |
| H | 0.7586   | 0.5286   | 1.00786  |
| H | 1.72455  | -0.4483  | -1.71759 |
| C | 2.93107  | -0.95067 | -0.01586 |

---

|   |         |          |          |
|---|---------|----------|----------|
| C | 4.0891  | -0.89628 | -0.80252 |
| C | 3.03383 | -1.30779 | 1.33732  |
| C | 5.33583 | -1.20024 | -0.25223 |
| H | 4.01783 | -0.60787 | -1.846   |
| C | 4.28216 | -1.61373 | 1.88263  |
| H | 2.14262 | -1.36766 | 1.95652  |
| C | 5.43406 | -1.56193 | 1.09298  |
| H | 6.22429 | -1.15346 | -0.87099 |
| H | 4.35165 | -1.89555 | 2.92679  |
| H | 6.39995 | -1.80111 | 1.52251  |
| C | 2.00944 | 1.8707   | -0.13459 |
| C | 2.71068 | 2.28651  | 1.00294  |
| C | 2.24488 | 2.51635  | -1.35528 |
| C | 3.63918 | 3.32675  | 0.9208   |
| H | 2.53624 | 1.79006  | 1.9507   |
| C | 3.1742  | 3.55381  | -1.43956 |
| H | 1.69434 | 2.22059  | -2.2419  |
| C | 3.87406 | 3.96172  | -0.30042 |
| H | 4.17537 | 3.64004  | 1.80892  |
| H | 3.34749 | 4.04702  | -2.38908 |
| H | 4.59284 | 4.77022  | -0.36457 |
| C | 0.69867 | -3.01021 | -1.21171 |
| C | 1.83314 | -3.86901 | -0.64101 |
| C | 0.82574 | -2.75148 | -2.72136 |
| H | 2.8085  | -3.42711 | -0.85094 |
| H | 1.72524 | -3.98858 | 0.44107  |

---

|    |          |          |          |
|----|----------|----------|----------|
| H  | 1.8071   | -2.3348  | -2.97054 |
| H  | 0.71865  | -3.70186 | -3.25369 |
| H  | -0.25881 | -3.50613 | -1.0182  |
| Cl | -0.29912 | -1.67963 | 2.49308  |
| H  | 0.37308  | -1.84216 | 0.57969  |
| C  | -1.3703  | 1.64232  | -0.2111  |
| C  | -2.36632 | 2.07668  | -1.04448 |
| C  | -1.47579 | 1.7169   | 1.30212  |
| C  | -3.64181 | 2.70796  | -0.54484 |
| C  | -2.90231 | 2.07812  | 1.7753   |
| H  | -1.18677 | 0.75176  | 1.73991  |
| C  | -3.50721 | 3.20243  | 0.91293  |
| H  | -3.92835 | 3.53547  | -1.20577 |
| H  | -2.86042 | 2.3743   | 2.829    |
| H  | -2.85481 | 4.08441  | 0.9446   |
| H  | -3.53632 | 1.18732  | 1.70266  |
| H  | -4.49087 | 3.49322  | 1.29898  |
| H  | -4.45312 | 1.96238  | -0.58752 |
| H  | -0.38068 | -1.27019 | -0.82454 |
| O  | -1.55668 | -0.78336 | -1.86076 |
| N  | -2.77671 | -0.2662  | -1.87083 |
| H  | -0.76274 | 2.47359  | 1.66139  |
| H  | -2.19011 | 2.08835  | -2.11292 |
| C  | -3.63398 | -0.74053 | -0.81704 |
| C  | -3.22777 | -1.42376 | 0.33868  |
| C  | -4.99693 | -0.46785 | -1.02243 |



---

|   |          |          |          |
|---|----------|----------|----------|
| C | -4.17858 | -1.83033 | 1.26948  |
| H | -2.18297 | -1.59961 | 0.55185  |
| C | -5.948   | -0.89091 | -0.0956  |
| H | -5.28417 | 0.05021  | -1.92909 |
| C | -5.53974 | -1.57314 | 1.05391  |
| H | -3.85122 | -2.33478 | 2.17055  |
| H | -6.9987  | -0.68961 | -0.26694 |
| H | -6.2737  | -1.89678 | 1.78251  |
| H | 1.78349  | -4.85899 | -1.10721 |
| H | 0.03513  | -2.07068 | -3.05208 |

**TS of 1a cat.-DMSO**

Temperature = 298.15 Kelvin

Pressure = 1 atm

Frequencies scaled by = 1

Electronic Energy (EE) = -1816.7683 Hartree

Zero-point Energy Correction = 0.603713 Hartree

Thermal Correction to Energy = 0.636379 Hartree

Thermal Correction to Enthalpy = 0.637323 Hartree

Thermal Correction to Free Energy = 0.537847 Hartree

EE + Zero-point Energy = -1816.1646 Hartree

EE + Thermal Energy Correction = -1816.1319 Hartree

EE + Thermal Enthalpy Correction = -1816.131 Hartree

EE + Thermal Free Energy Correction = -1816.2304 Hartree

E (Thermal) = 399.334 kcal/mol

Heat Capacity (Cv) = 125.915 cal/mol-kelvin

Entropy (S) = 209.366 cal/mol-kelvin

Symbolic Z-matrix:

Charge = 0 Multiplicity = 1

|   |          |          |          |
|---|----------|----------|----------|
| C | -0.8622  | 1.02987  | 0.03712  |
| C | -1.56313 | -0.27844 | 0.532    |
| N | -0.59032 | -1.44055 | 0.28331  |
| N | 0.40683  | 1.20936  | 0.77103  |
| H | 0.36469  | 1.10597  | 1.78318  |
| H | -0.62725 | 0.90214  | -1.02063 |
| H | -1.69987 | -0.21328 | 1.61306  |
| C | -2.91111 | -0.47389 | -0.13989 |

|   |          |          |          |
|---|----------|----------|----------|
| C | -4.07546 | -0.434   | 0.63849  |
| C | -3.0187  | -0.64506 | -1.52885 |
| C | -5.33219 | -0.57207 | 0.04351  |
| H | -4.00252 | -0.28895 | 1.71092  |
| C | -4.27557 | -0.78467 | -2.12029 |
| H | -2.12442 | -0.69625 | -2.14254 |
| C | -5.43442 | -0.74893 | -1.33813 |
| H | -6.22459 | -0.54074 | 0.65722  |
| H | -4.34975 | -0.92321 | -3.19262 |
| H | -6.40766 | -0.85789 | -1.8021  |
| C | -1.7819  | 2.23964  | 0.2108   |
| C | -2.34655 | 2.85774  | -0.91151 |
| C | -2.0567  | 2.75472  | 1.48518  |
| C | -3.1818  | 3.96858  | -0.76384 |
| H | -2.13836 | 2.46709  | -1.90119 |
| C | -2.89332 | 3.86231  | 1.634    |
| H | -1.61712 | 2.30132  | 2.3667   |
| C | -3.45839 | 4.47218  | 0.50938  |
| H | -3.61204 | 4.43849  | -1.64046 |
| H | -3.10048 | 4.25071  | 2.62428  |
| H | -4.10521 | 5.33376  | 0.62573  |
| C | -0.9762  | -2.8656  | 0.76768  |
| C | -1.89867 | -3.56034 | -0.25907 |
| C | -1.55033 | -2.85508 | 2.19689  |
| H | -2.89961 | -3.20164 | -0.13928 |
| H | -1.55781 | -3.34231 | -1.24961 |

---

|    |          |          |          |
|----|----------|----------|----------|
| H  | -2.3559  | -2.15304 | 2.25249  |
| H  | -1.91079 | -3.83185 | 2.44365  |
| H  | -0.01099 | -3.38607 | 0.77157  |
| Cl | 0.2956   | -1.34844 | -2.73893 |
| H  | -0.37929 | -1.48879 | -0.75446 |
| C  | 1.55928  | 1.764    | 0.26713  |
| C  | 2.5755   | 2.09374  | 1.12487  |
| C  | 1.68237  | 1.90664  | -1.24018 |
| C  | 3.8855   | 2.68199  | 0.6633   |
| C  | 3.1317   | 2.20386  | -1.68801 |
| H  | 1.33629  | 0.98415  | -1.72461 |
| C  | 3.79038  | 3.25119  | -0.76997 |
| H  | 4.20808  | 3.46062  | 1.36527  |
| H  | 3.11705  | 2.55138  | -2.72678 |
| H  | 3.18736  | 4.16807  | -0.76501 |
| H  | 3.71423  | 1.27622  | -1.65025 |
| H  | 4.79151  | 3.50491  | -1.13617 |
| H  | 4.65786  | 1.89546  | 0.67545  |
| H  | 0.32992  | -1.17858 | 0.74315  |
| O  | 1.58421  | -0.7514  | 1.7341   |
| N  | 2.83138  | -0.3045  | 1.78428  |
| H  | 1.02096  | 2.72213  | -1.56727 |
| H  | 2.38874  | 2.0681   | 2.19122  |
| C  | 3.6731   | -0.77632 | 0.7151   |
| C  | 3.23669  | -1.41844 | -0.45281 |
| C  | 5.04668  | -0.56754 | 0.92272  |

---

|   |          |          |          |
|---|----------|----------|----------|
| C | 4.16656  | -1.84187 | -1.39744 |
| H | 2.18271  | -1.55643 | -0.64366 |
| C | 5.97683  | -1.00329 | -0.02057 |
| H | 5.36199  | -0.08899 | 1.84165  |
| C | 5.53817  | -1.64043 | -1.18489 |
| H | 3.82239  | -2.3226  | -2.30559 |
| H | 7.03511  | -0.84856 | 0.15133  |
| H | 6.25592  | -1.97659 | -1.92363 |
| H | -1.87734 | -4.61812 | -0.09928 |
| H | -0.78314 | -2.57304 | 2.88738  |

**Figure 6.**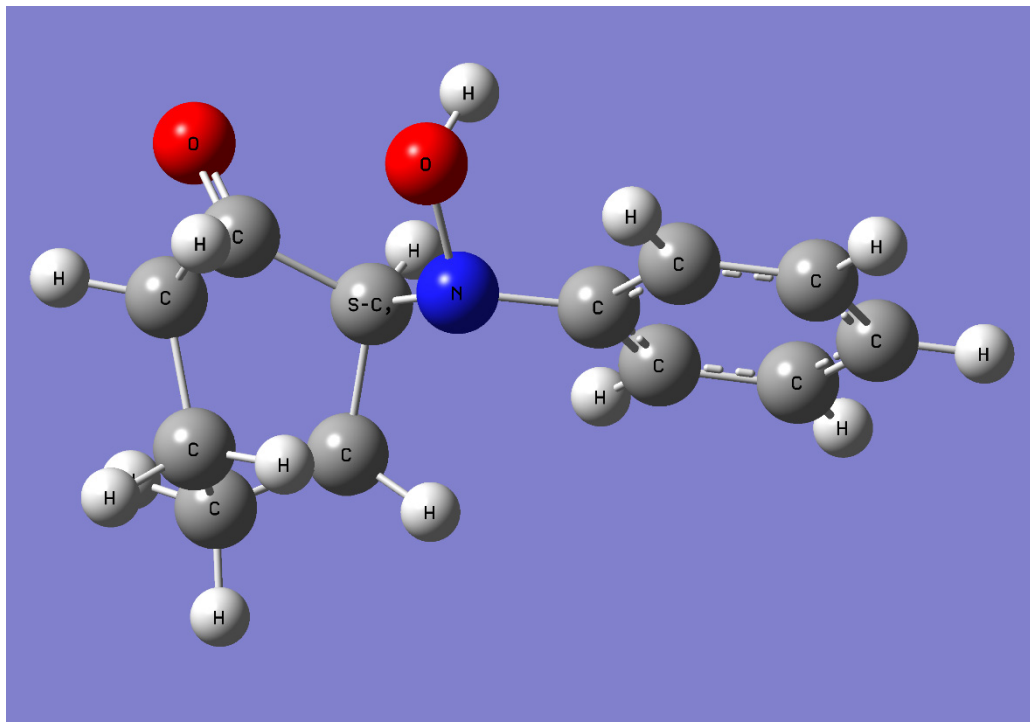**Product**

Temperature = 298.15 Kelvin

Pressure = 1 atm

Frequencies scaled by = 1

Electronic Energy (EE) = -667.77052 Hartree

Zero-point Energy Correction = 0.253318 Hartree

Thermal Correction to Energy = 0.266508 Hartree

Thermal Correction to Enthalpy = 0.267452 Hartree

Thermal Correction to Free Energy = 0.213275 Hartree

EE + Zero-point Energy = -667.51721 Hartree

EE + Thermal Energy Correction = -667.50402 Hartree

EE + Thermal Enthalpy Correction = -667.50307 Hartree

EE + Thermal Free Energy Correction = -667.55725 Hartree

E (Thermal) = 167.236 kcal/mol

Heat Capacity (Cv) = 52.181 cal/mol-kelvin

Entropy (S) = 114.026 cal/mol-kelvin

Symbolic Z-matrix:

Charge = 0 Multiplicity = 1

|   |          |          |          |
|---|----------|----------|----------|
| C | -2.2262  | -0.59145 | 0.73242  |
| C | -0.94088 | 0.25452  | 0.7442   |
| C | -2.87112 | -0.74782 | -0.6359  |
| C | -1.2497  | 1.69383  | 0.21642  |
| C | -2.61827 | 0.48463  | -1.54335 |
| H | -2.44336 | -1.65319 | -1.08    |
| C | -2.53033 | 1.74419  | -0.6565  |
| H | -1.34432 | 2.3717   | 1.07054  |
| H | -3.42731 | 0.57604  | -2.27475 |
| H | -3.42038 | 1.79247  | -0.01492 |
| H | -1.67406 | 0.35901  | -2.08066 |
| H | -2.51144 | 2.65389  | -1.26596 |
| H | -0.40023 | 2.02403  | -0.38729 |
| O | -0.20987 | -1.90814 | -0.08327 |
| N | 0.01581  | -0.42968 | -0.17175 |
| H | -3.94214 | -0.90975 | -0.47637 |
| H | -0.56222 | 0.27319  | 1.77459  |
| C | 1.41495  | -0.15311 | -0.06907 |
| C | 2.31591  | -1.03622 | -0.69403 |
| C | 1.92005  | 0.9722   | 0.60227  |

---

|   |         |          |          |
|---|---------|----------|----------|
| C | 3.68327 | -0.78245 | -0.66871 |
| H | 1.91818 | -1.91516 | -1.18023 |
| C | 3.29528 | 1.22305  | 0.61217  |
| H | 1.25712 | 1.65204  | 1.11871  |
| C | 4.18403 | 0.35346  | -0.02117 |
| H | 4.36157 | -1.47423 | -1.15484 |
| H | 3.66749 | 2.09877  | 1.13134  |
| H | 5.24906 | 0.55041  | -0.00501 |
| O | -2.7017 | -1.05418 | 1.77246  |
| H | 0.19189 | -2.18192 | 0.80097  |



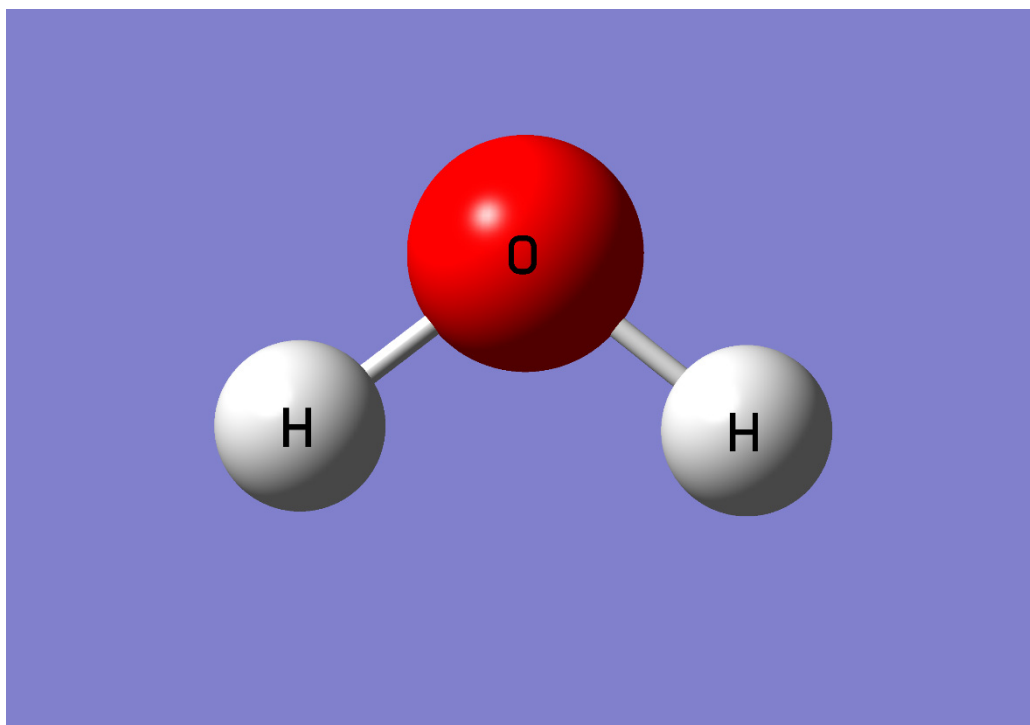**H<sub>2</sub>O**

Temperature = 298.15 Kelvin

Pressure = 1 atm

Frequencies scaled by = 1

Electronic Energy (EE) = -75.981704 Hartree

Zero-point Energy Correction = 0.019853 Hartree

Thermal Correction to Energy = 0.022688 Hartree

Thermal Correction to Enthalpy = 0.023632 Hartree

Thermal Correction to Free Energy = 0.002108 Hartree

EE + Zero-point Energy = -75.961851 Hartree

EE + Thermal Energy Correction = -75.959016 Hartree

EE + Thermal Enthalpy Correction = -75.958072 Hartree

EE + Thermal Free Energy Correction = -75.979596 Hartree

E (Thermal) = 14.237 kcal/mol

Heat Capacity (Cv) = 5.998 cal/mol-kelvin

Entropy (S) = 45.3 cal/mol-kelvin

Symbolic Z-matrix:

Charge = 0 Multiplicity = 1

|   |    |          |          |
|---|----|----------|----------|
| O | 0. | 0.       | 0.12313  |
| H | 0. | 0.78232  | -0.49254 |
| H | 0. | -0.78232 | -0.49254 |
